# Supplementary material for: New β-carboline derivatives containing imidazolium as potential VEGFR2 inhibitors: synthesis, X-ray structure, antiproliferative evaluations, and molecular modeling
Source: Royal Society of Chemistry journal article supplement (doi:10.1039/d2md00065b), 2022-01-01
Supplement: d2md00065b1.pdf [file d2md00065b1.pdf]

## Supplementary Information

### **New $\beta$ -carboline containing imidazolium derivatives as potential VEGFR2 inhibitors: synthesis, X-ray structure, antiproliferative evaluations, and molecular modeling**

Ling Ma<sup>a</sup>, Xiaofei Chen<sup>a</sup>, Siyu Zhu<sup>a</sup>, Wei Chen<sup>b</sup>, Qin Ma<sup>b</sup>, Wenxi Fan<sup>b</sup>,

Jie Zhang<sup>a,\*</sup>, Liang Guo<sup>a,\*</sup>

*<sup>a</sup>School of Chemistry and Chemical Engineering/Key Laboratory for Green Processing of Chemical Engineering of XinJiang Bingtuan, Shihezi University, Shihezi, China*

*<sup>b</sup>XinJiang Huashidan Pharmaceutical Research Co. Ltd., Urumqi, China*

#### Contents

<sup>1</sup>H NMR, <sup>13</sup>C NMR and HRMS data of the target compounds .....S2-S57

---

\* Corresponding author. School of Chemistry and Chemical Engineering, Shihezi University, Shihezi 832003, PRC. Tel: 86-993-2057215 Fax: 86-993-2058176, E-mail: zhangjie-xj@163.com (J. Zhang), guoliang\_xj@163.com (L. Guo)

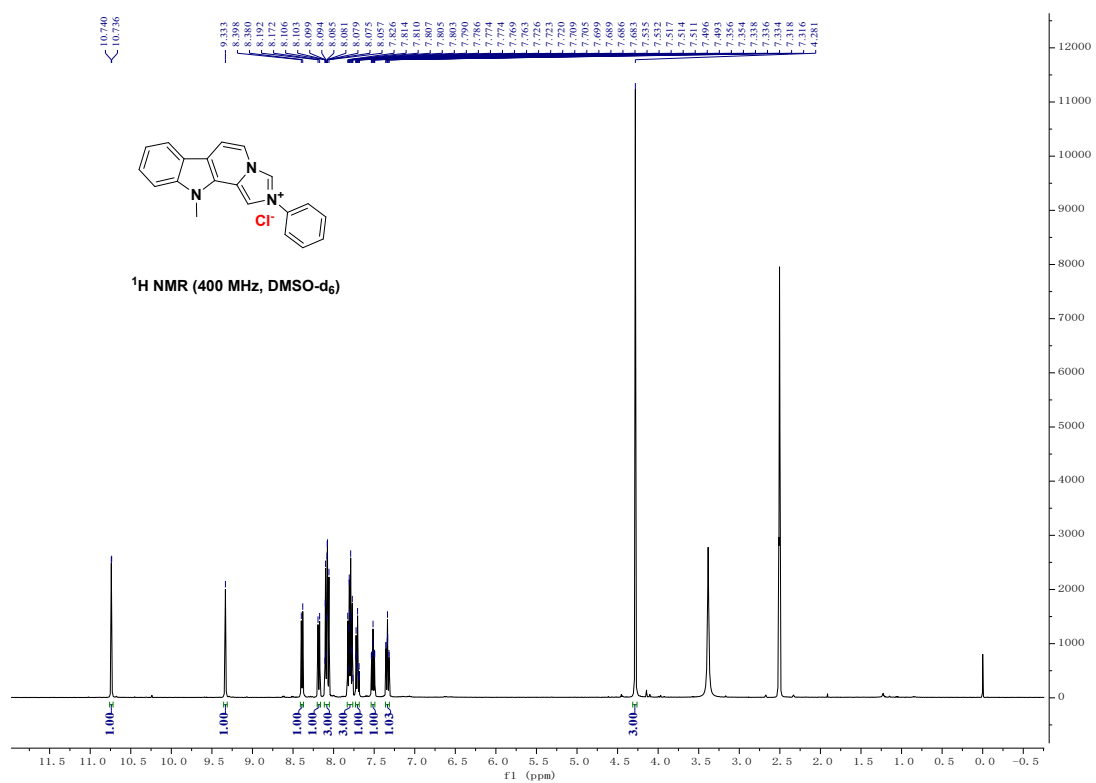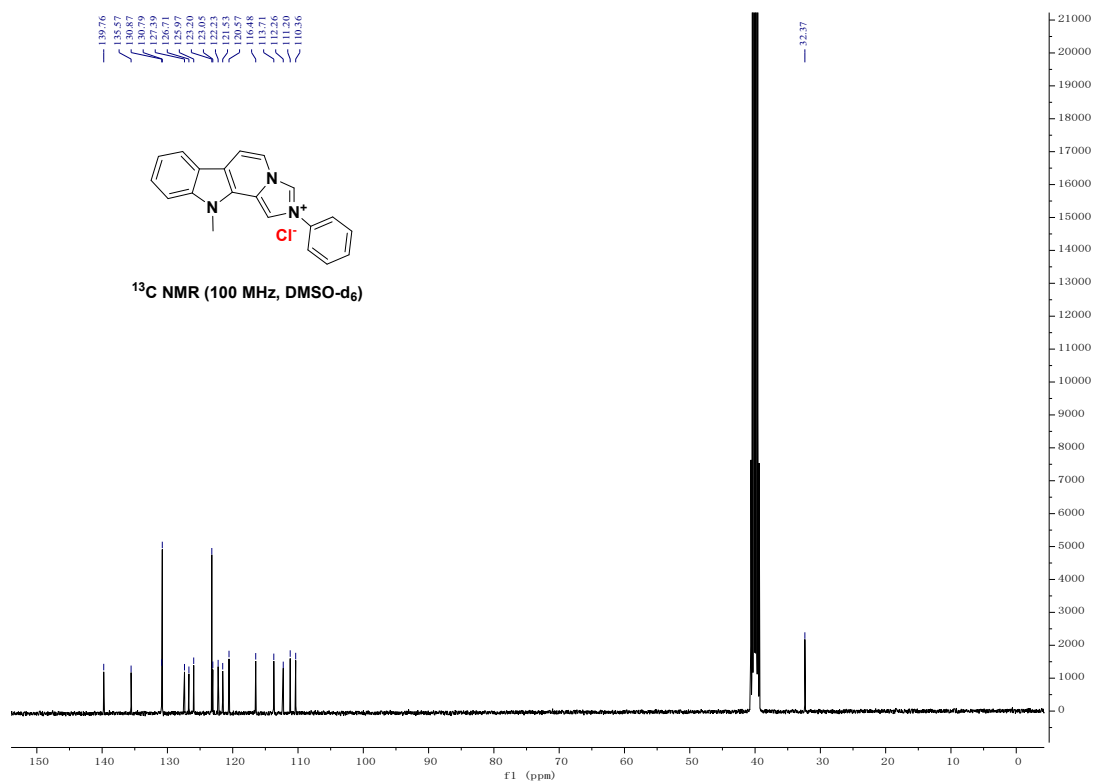

Figure S1-1 the <sup>1</sup>H NMR spectrum and <sup>13</sup>C NMR spectrum of compound 3a

111 #10 RT: 0.12 AV: 1 NL: 3.93E8  
T: FTMS + p ESI Full ms [150.00-2000.00]

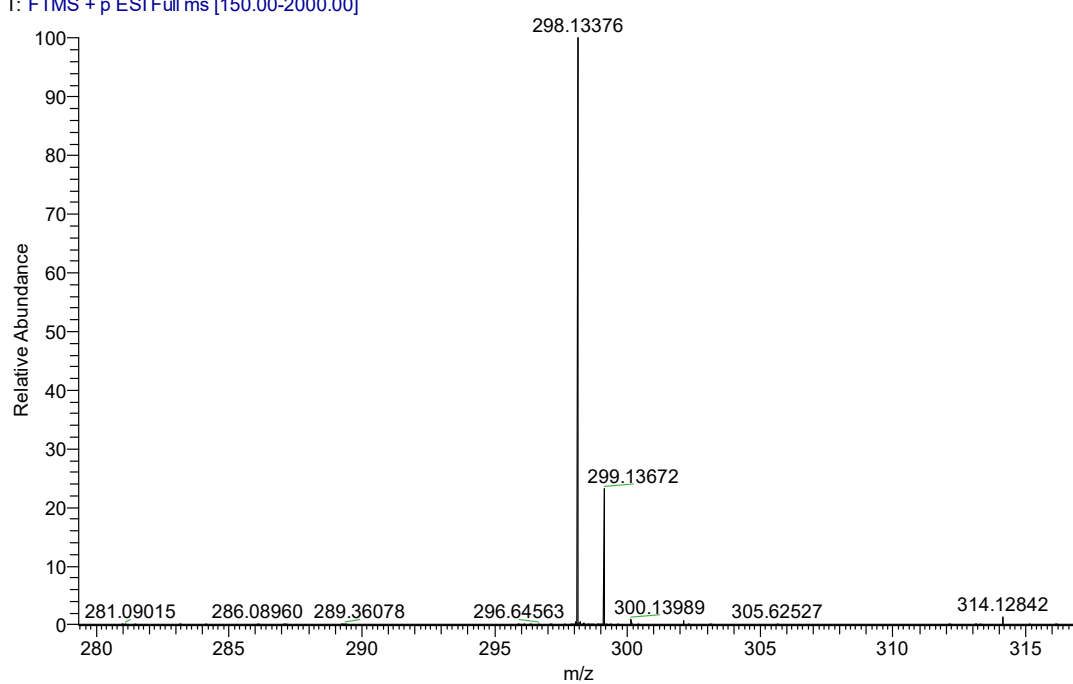

Figure S1-2 the HRMS data of compound 3a

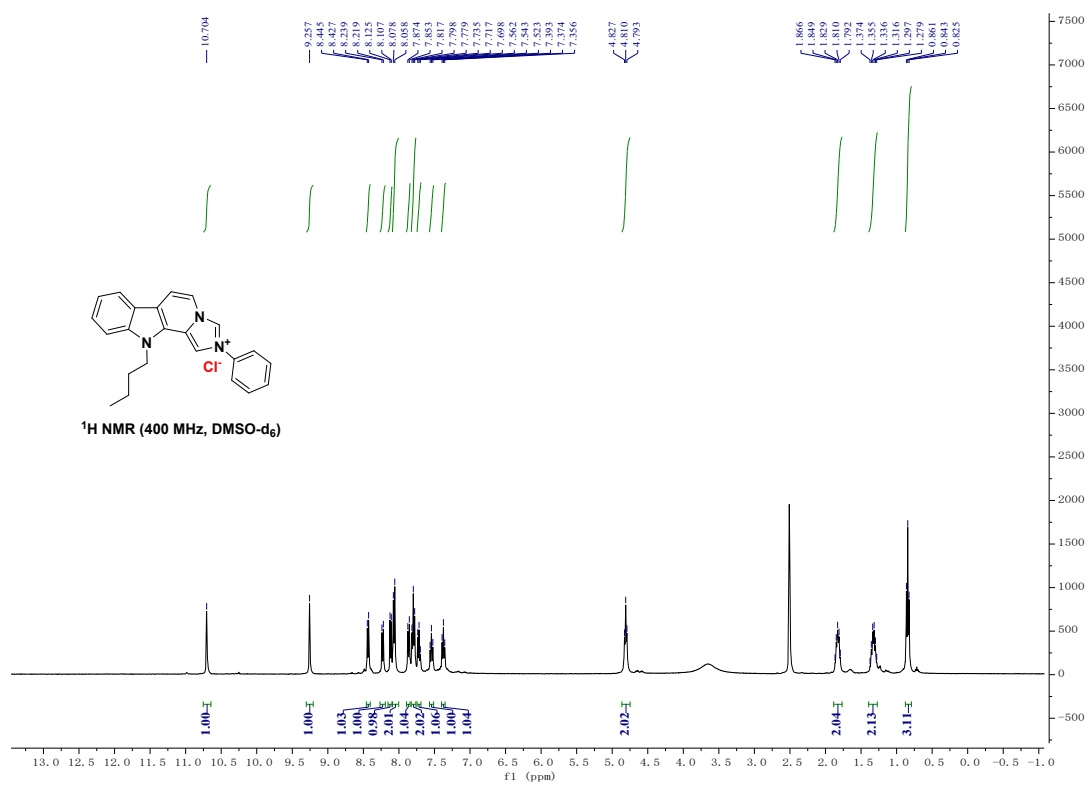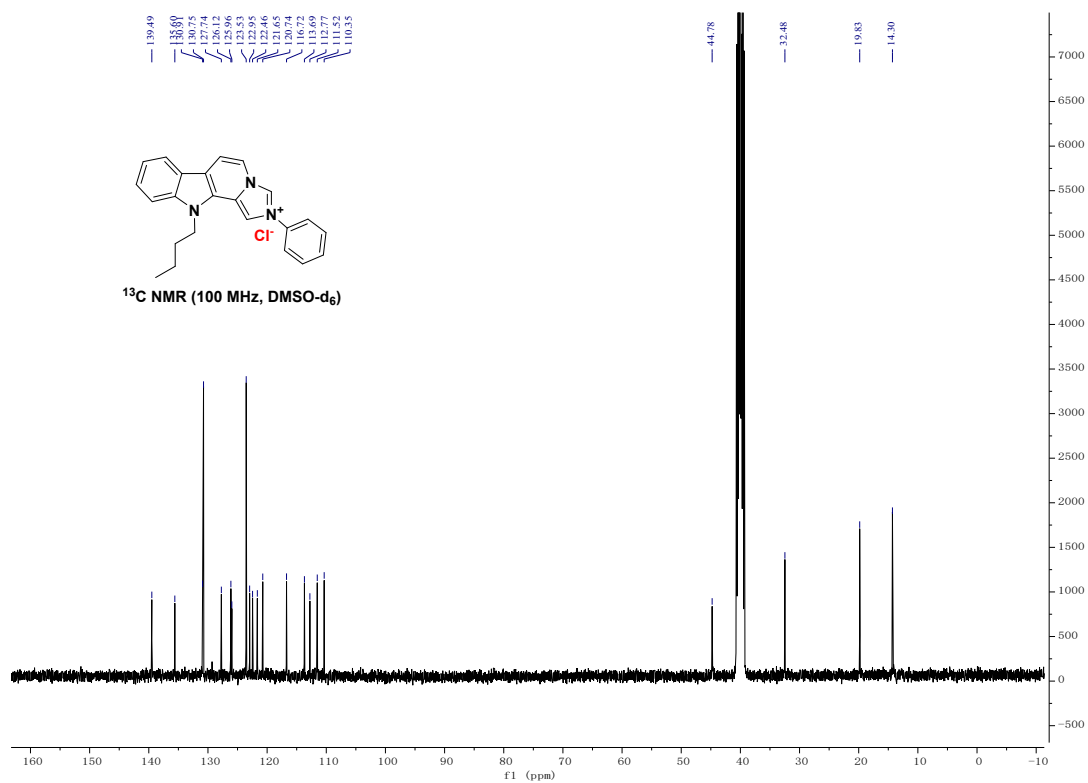

Figure S2-1 the <sup>1</sup>H NMR spectrum and <sup>13</sup>C NMR spectrum of compound 3b

112 #11 RT: 0.14 AV: 1 NL: 9.81E7  
T: FTMS + p ESI Full ms [150.00-2000.00]

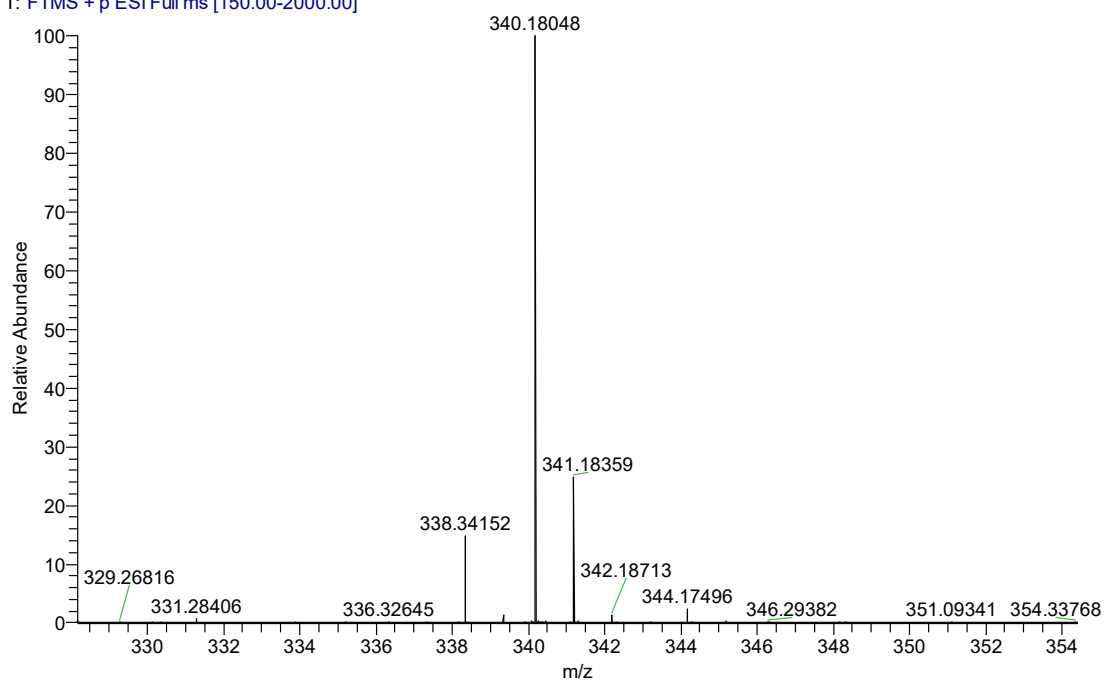

Figure S2-2 the HRMS data of compound 3b

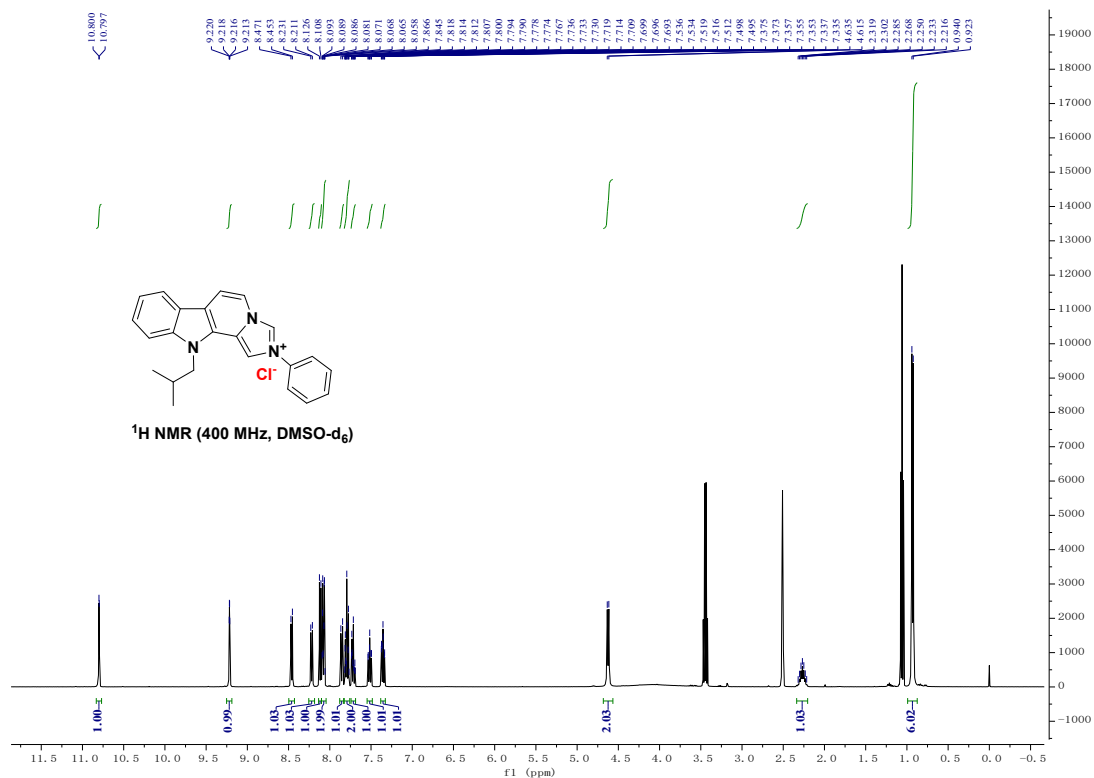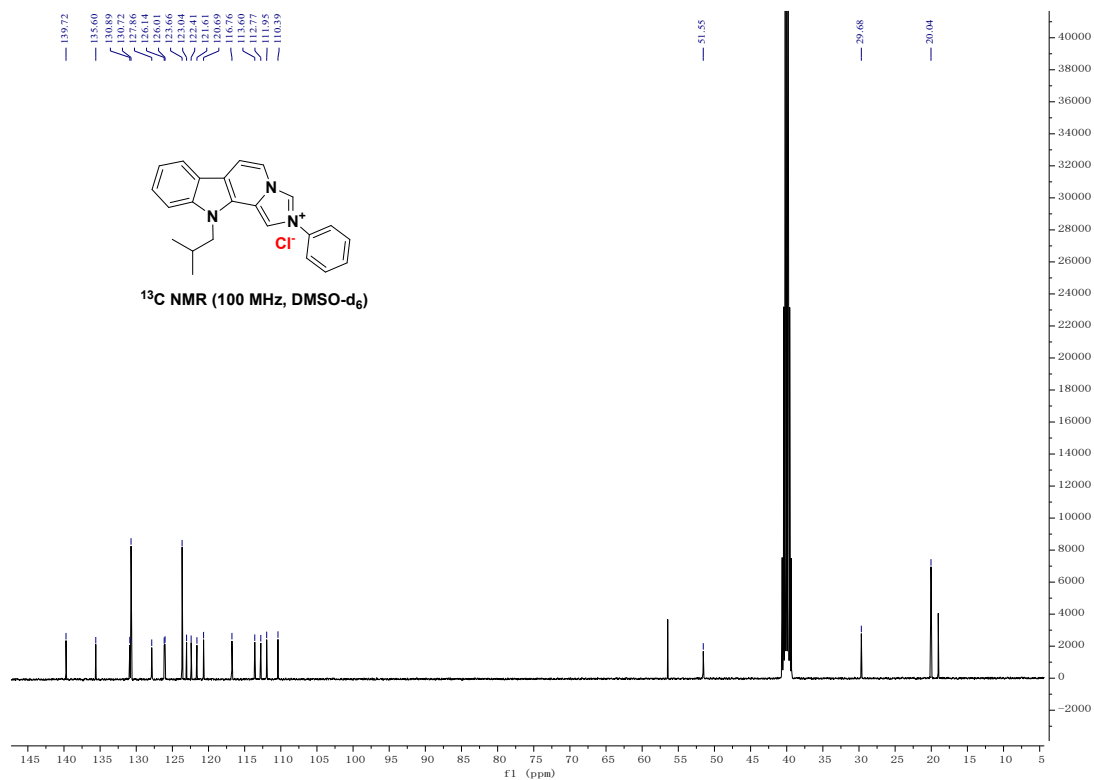

Figure S3-1 the <sup>1</sup>H NMR spectrum and <sup>13</sup>C NMR spectrum of compound **3c**

113 #11 RT: 0.14 AV: 1 NL: 6.61E8  
T: FTMS + p ESI Full ms [150.00-2000.00]

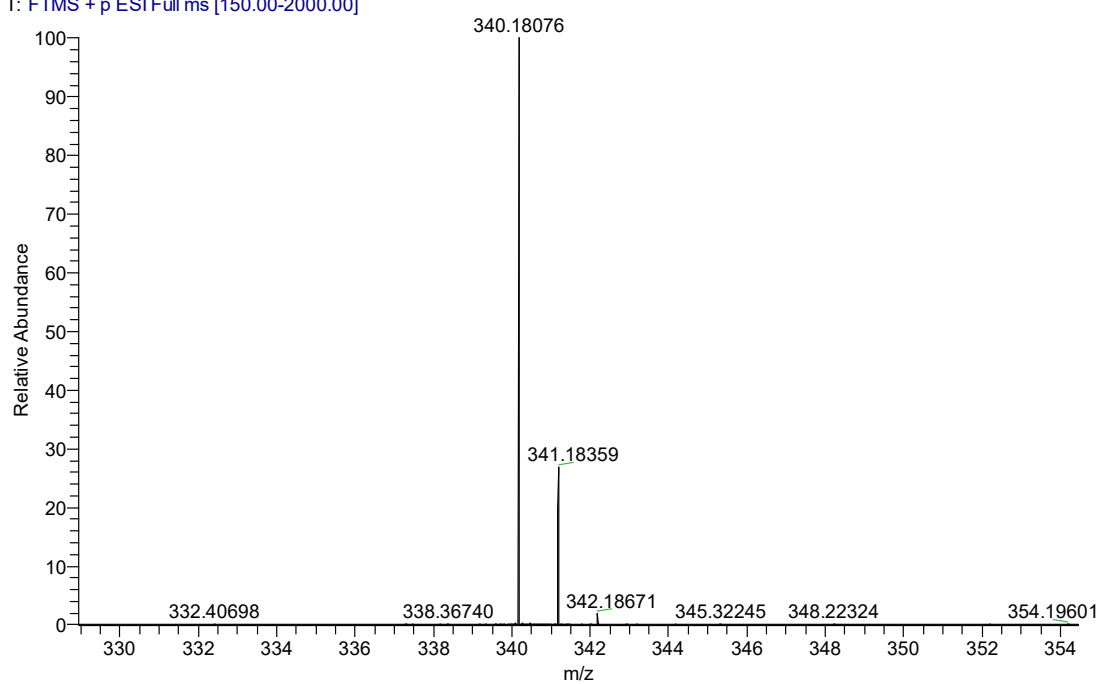

Figure S3-2 the HRMS data of compound 3c

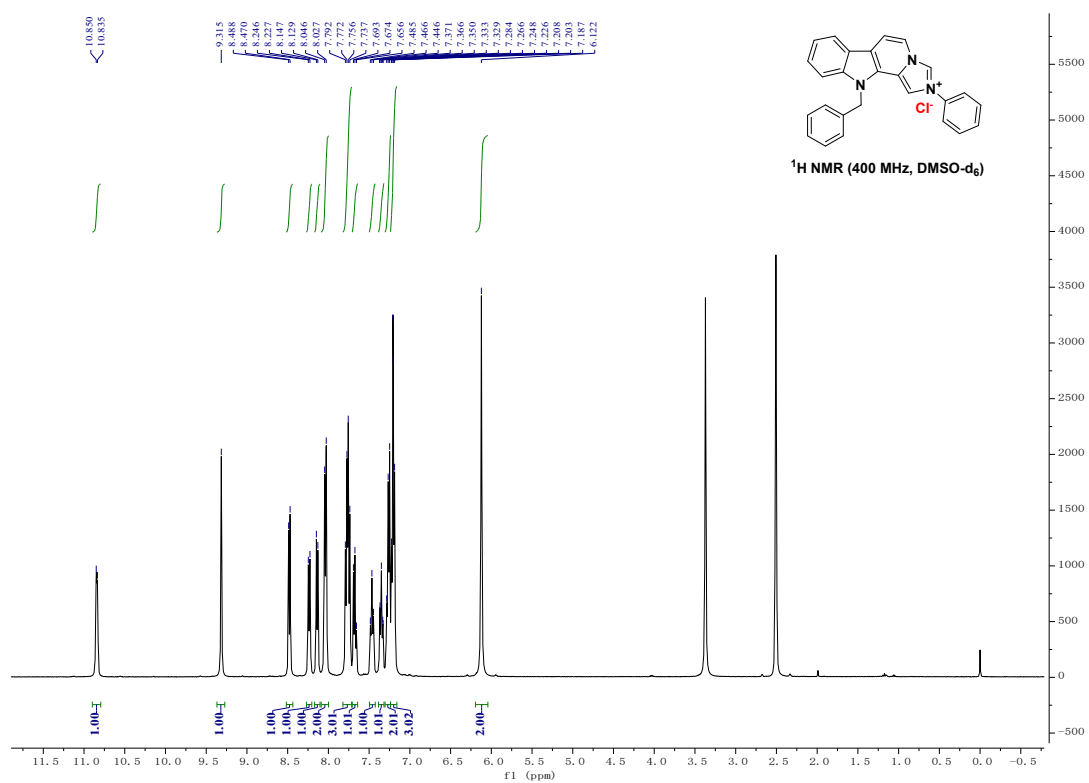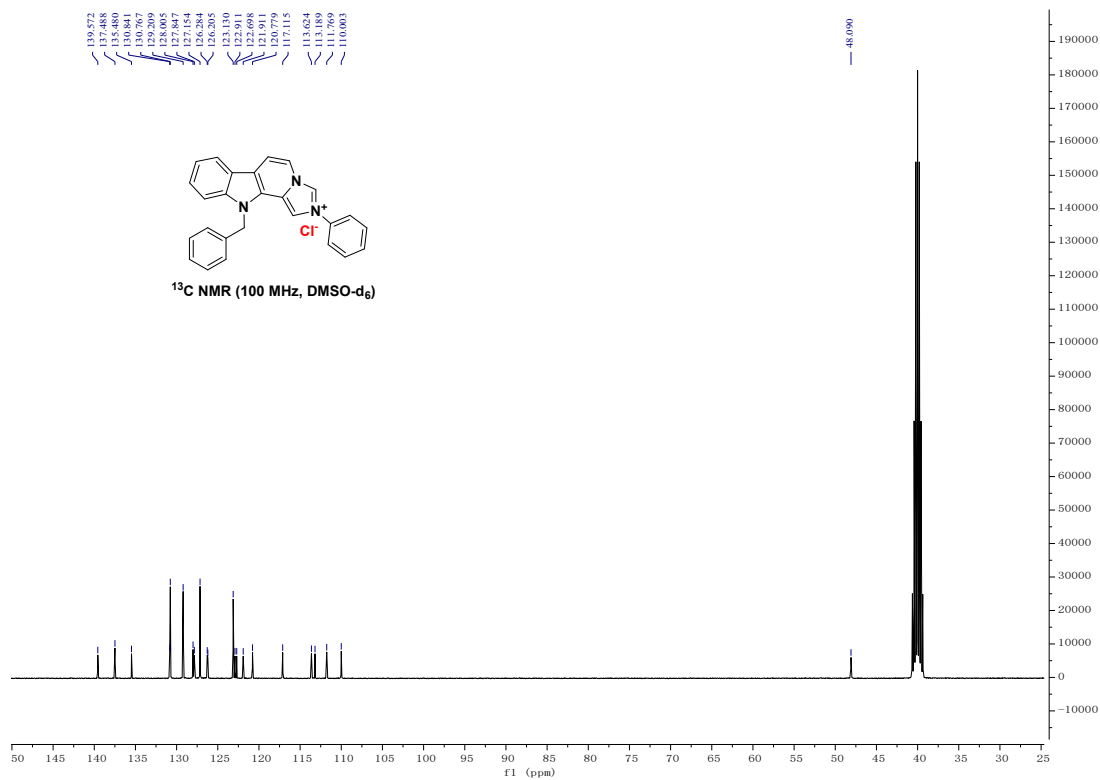

Figure S4-1 the <sup>1</sup>H NMR spectrum and <sup>13</sup>C NMR spectrum of compound 3d



107 #11 RT: 0.14 AV: 1 NL: 6.84E8  
T: FTMS + p ESI Full ms [150.00-2000.00]

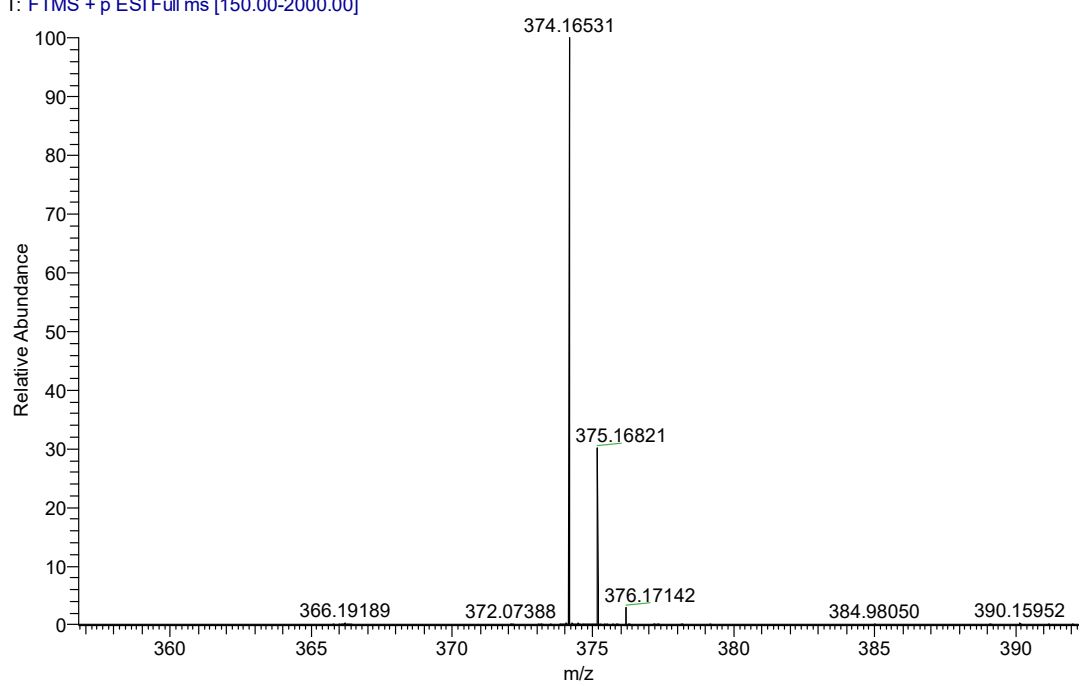

**Figure S4-2** the HRMS data of compound **3d**

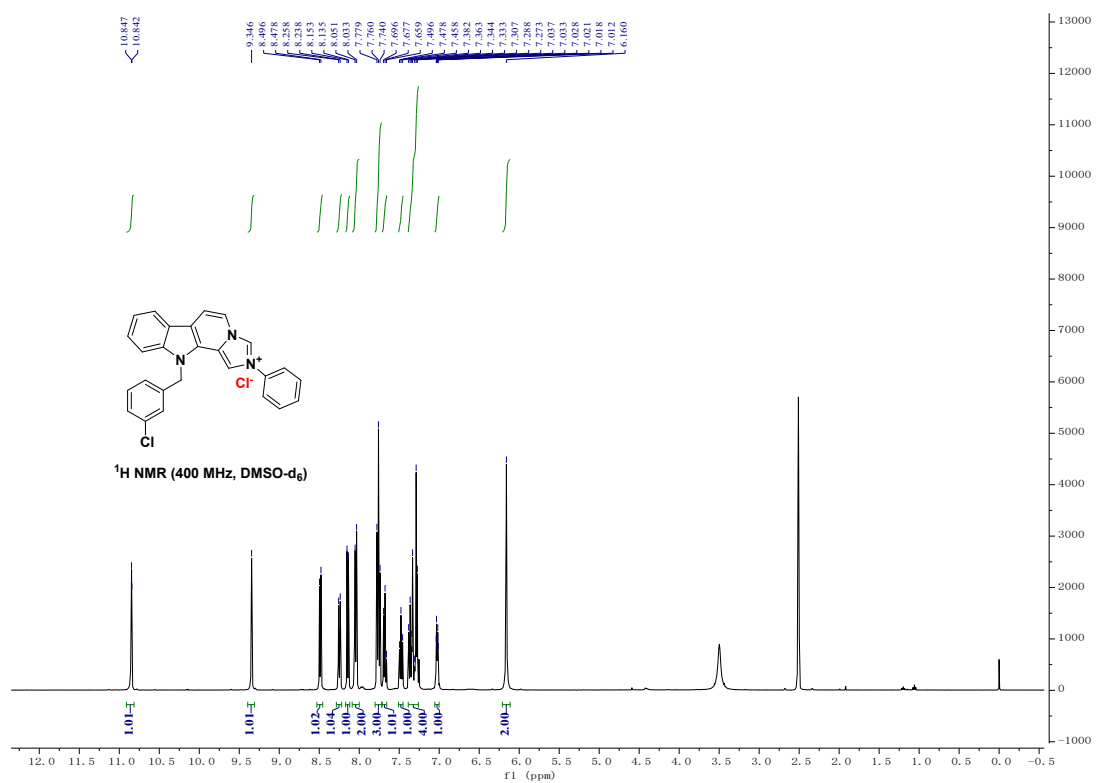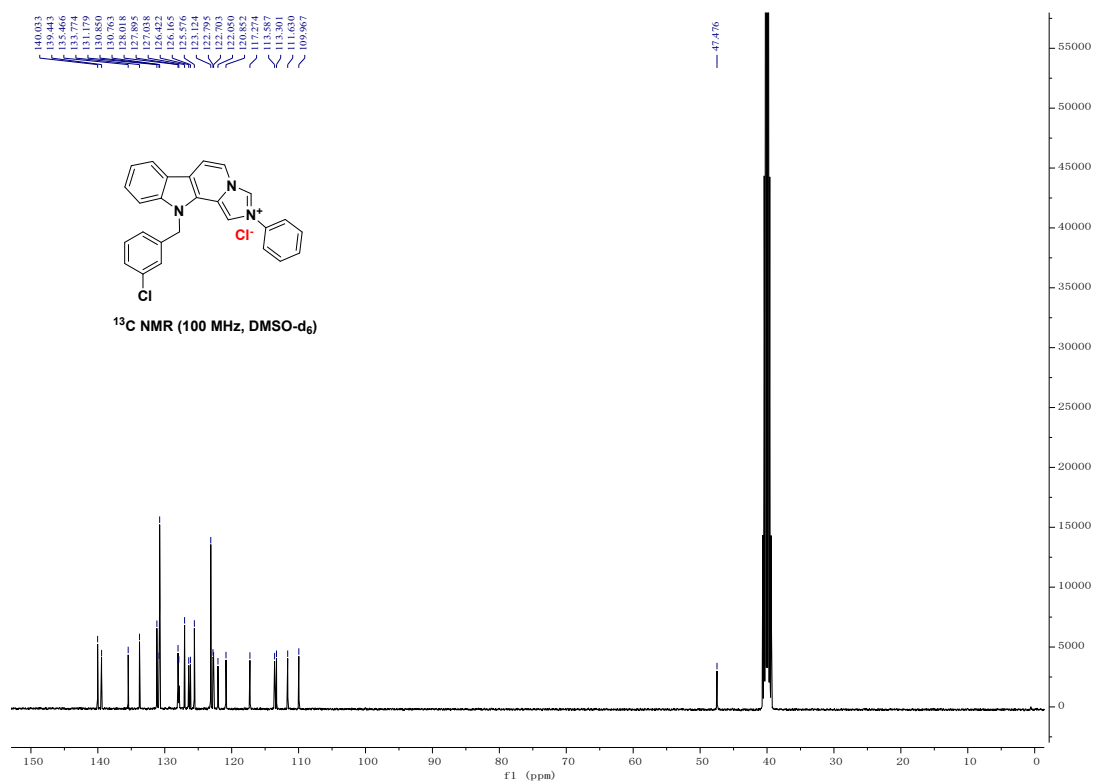

Figure S5-1 the  $^1\text{H}$  NMR spectrum and  $^{13}\text{C}$  NMR spectrum of compound **3e**

109 #11 RT: 0.14 AV: 1 NL: 5.05E8  
T: FTMS + p ESI Full ms [150.00-2000.00]

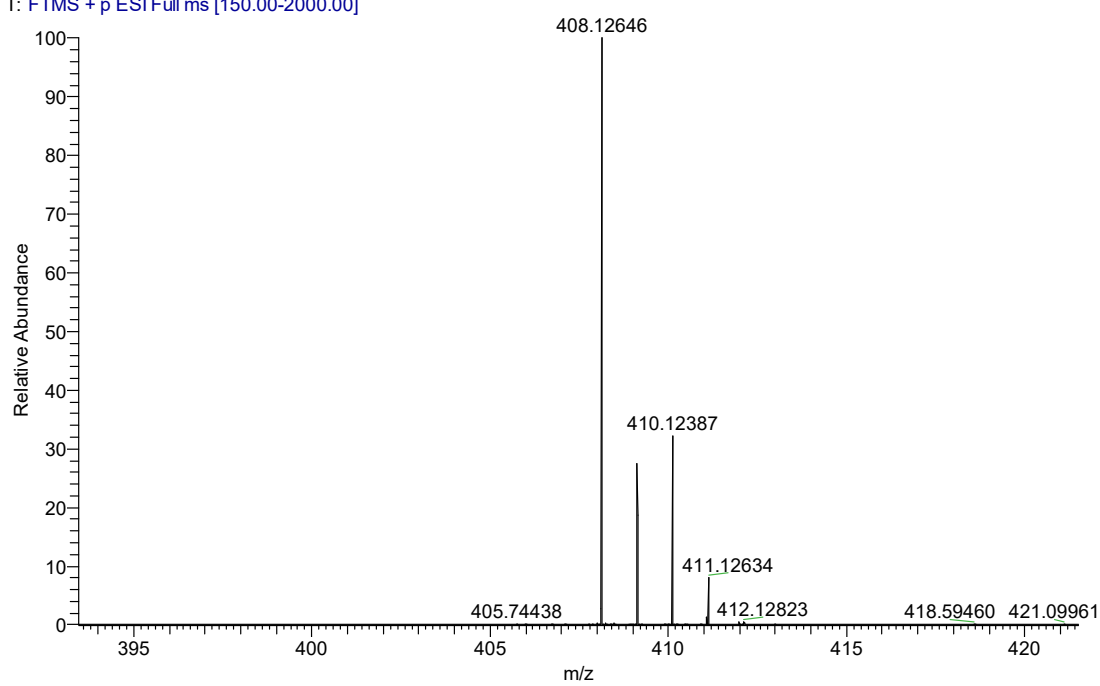

Figure S5-2 the HRMS data of compound 3e

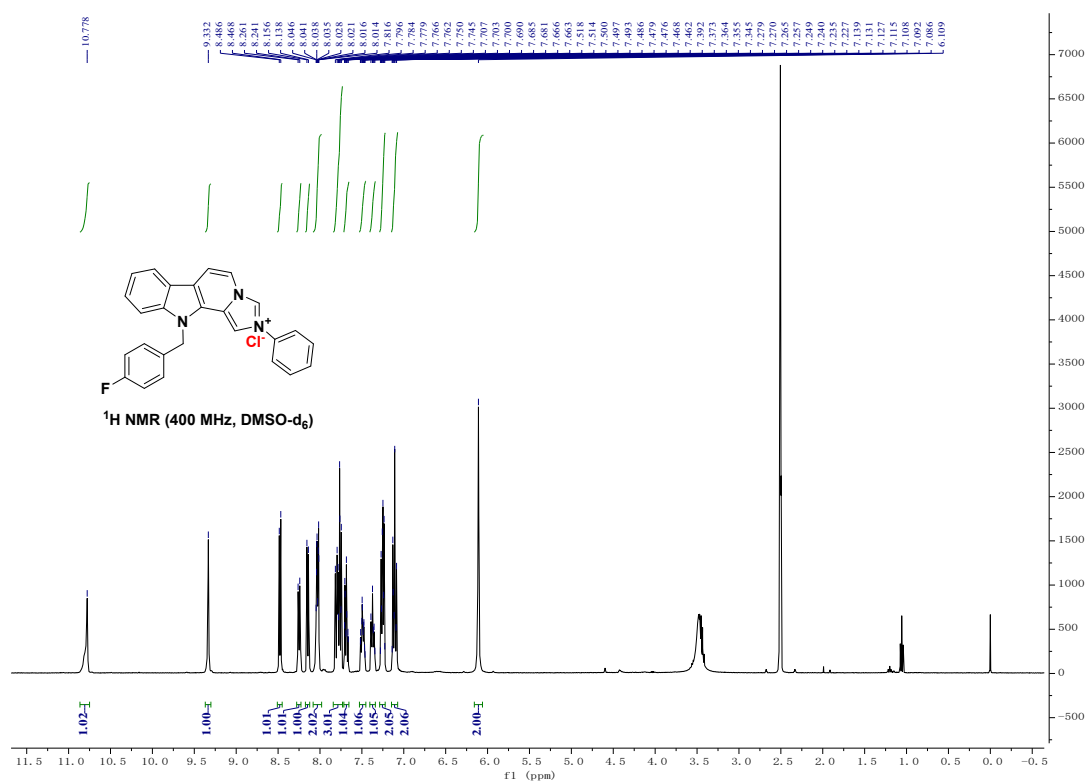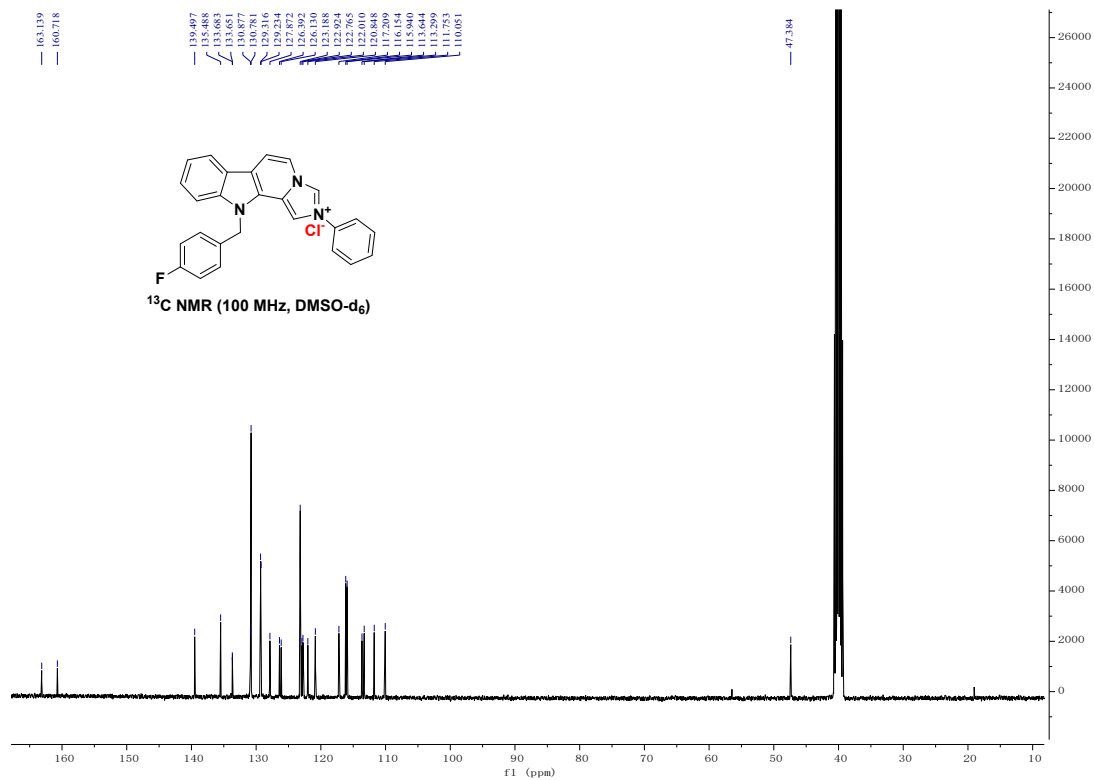

Figure S6-1 the <sup>1</sup>H NMR spectrum and <sup>13</sup>C NMR spectrum of compound 3f

108 #10 RT: 0.13 AV: 1 NL: 6.25E8  
T: FTMS + p ESI Full ms [150.00-2000.00]

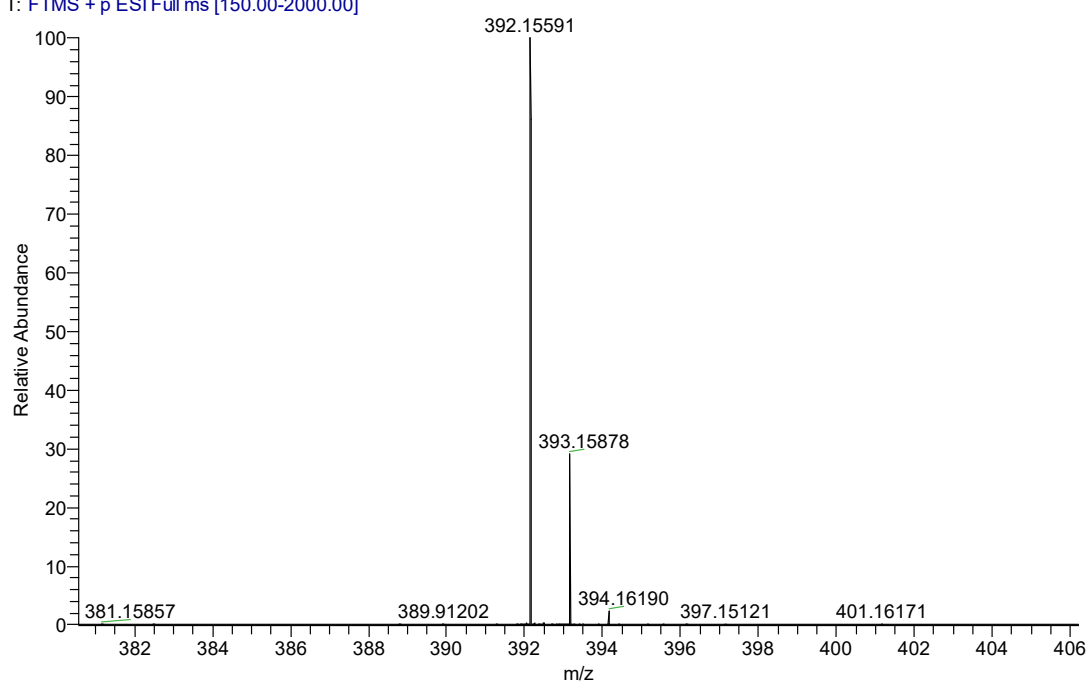

Figure S6-2 the HRMS data of compound 3f

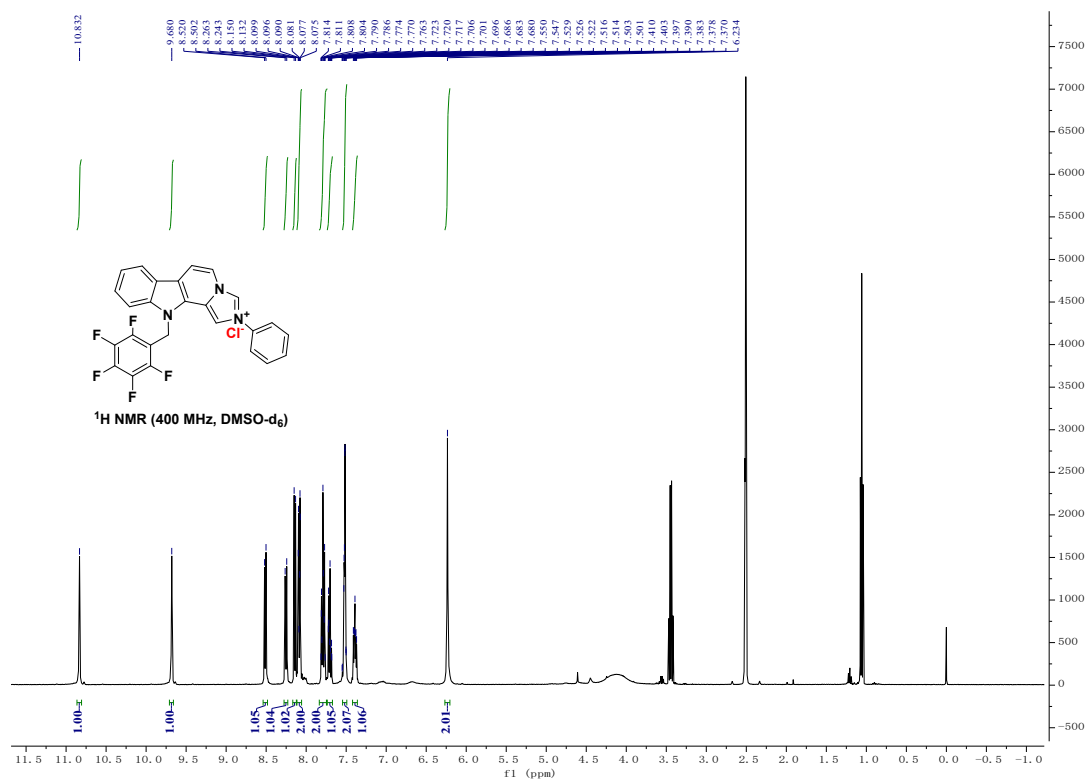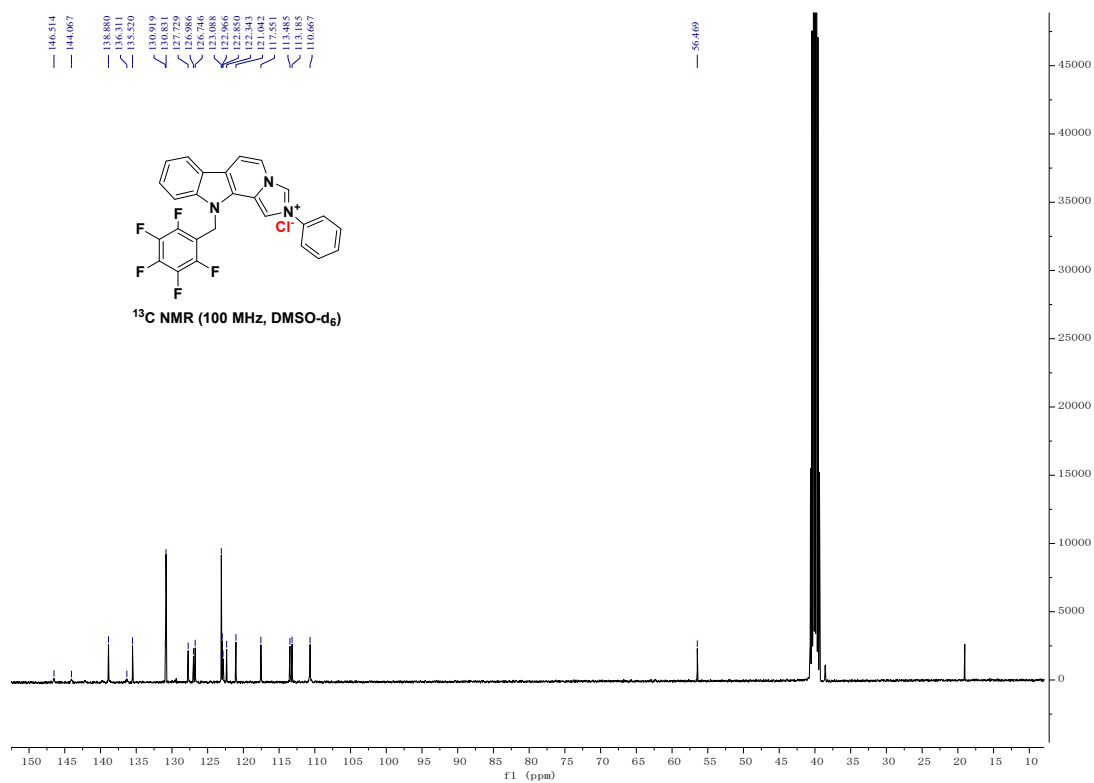

Figure S7-1 the <sup>1</sup>H NMR spectrum and <sup>13</sup>C NMR spectrum of compound 3g

110 #10 RT: 0.13 AV: 1 NL: 7.58E8  
T: FTMS + p ESI Full ms [150.00-2000.00]

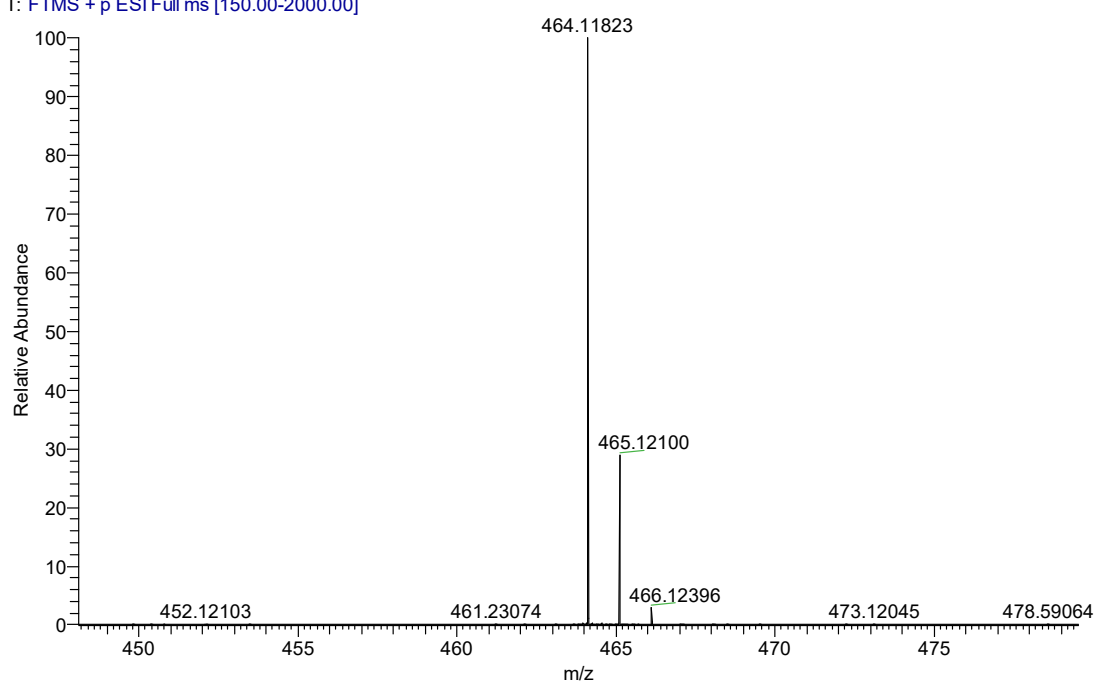

Figure S7-2 the HRMS data of compound 3g

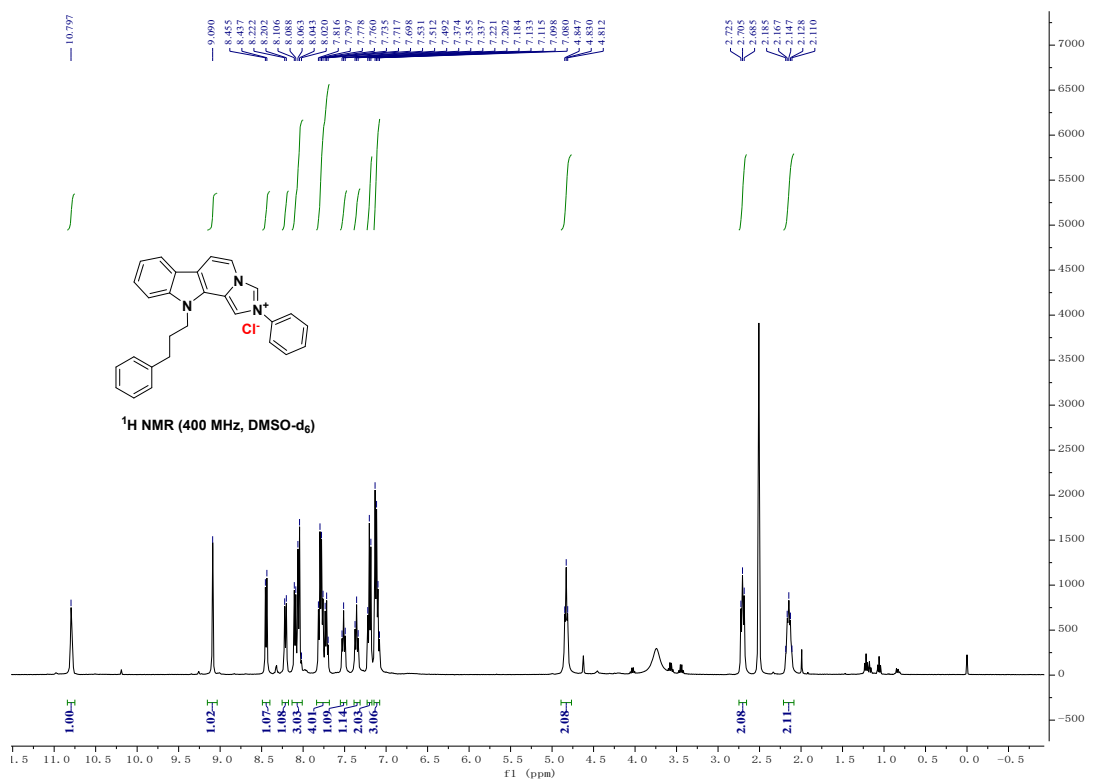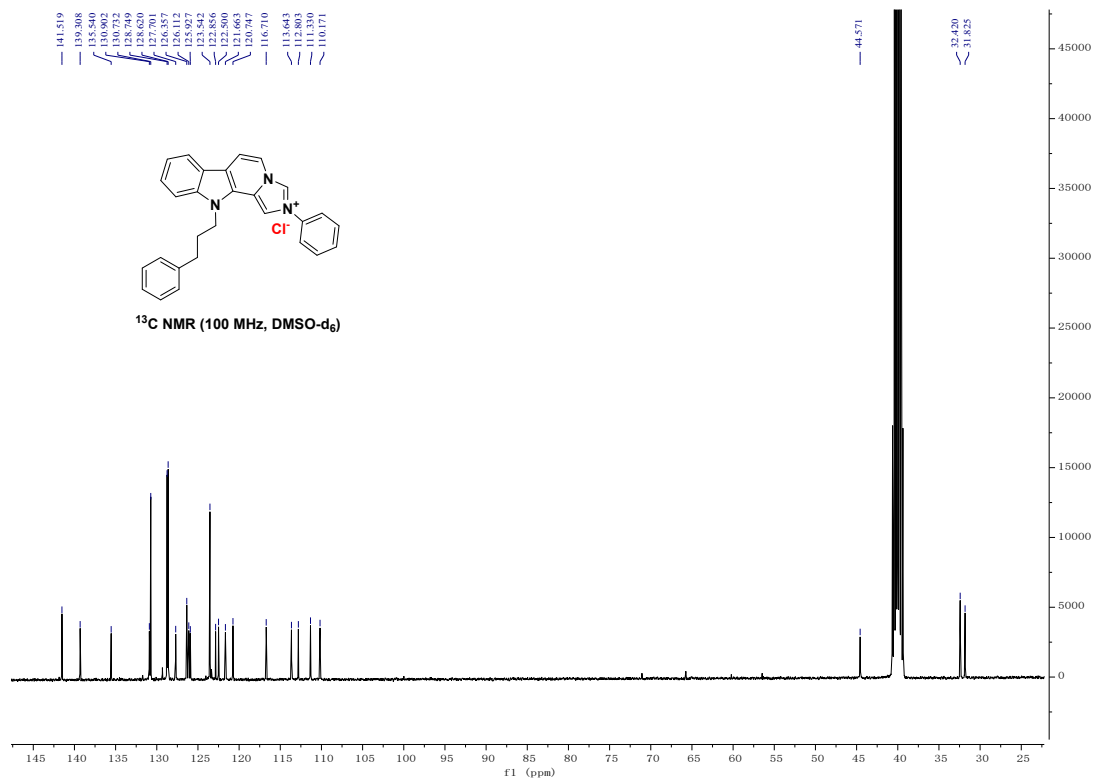

Figure S8-1 the <sup>1</sup>H NMR spectrum and <sup>13</sup>C NMR spectrum of compound 3h



114 #11 RT: 0.14 AV: 1 NL: 6.80E8  
T: FTMS + p ESI Full ms [150.00-2000.00]

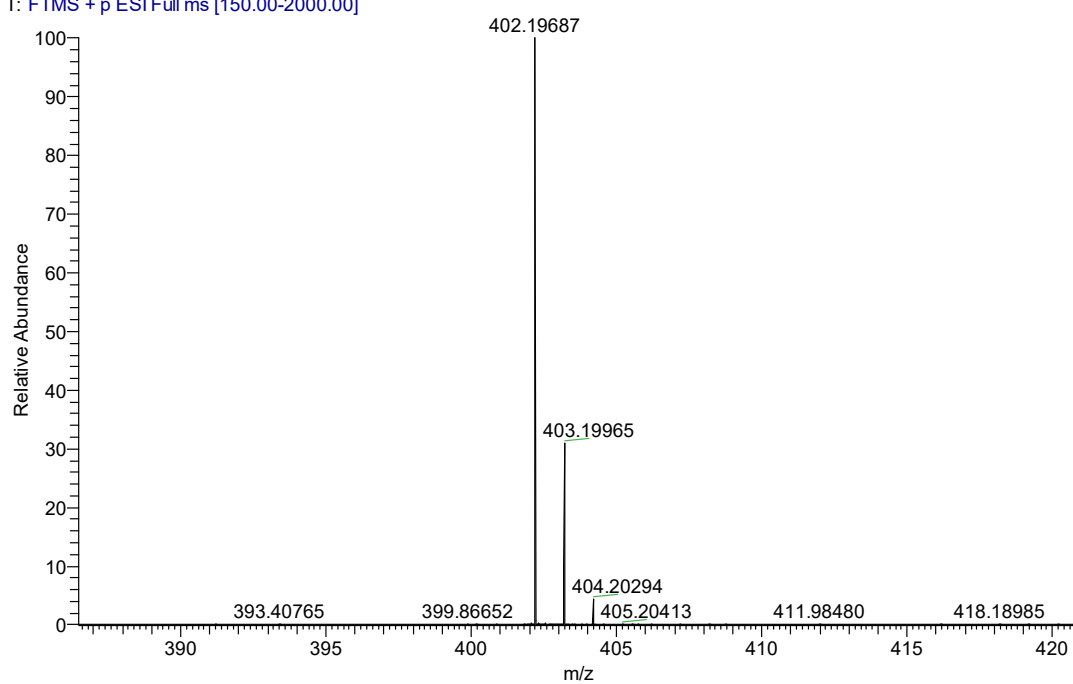

**Figure S8-2** the HRMS data of compound **3h**

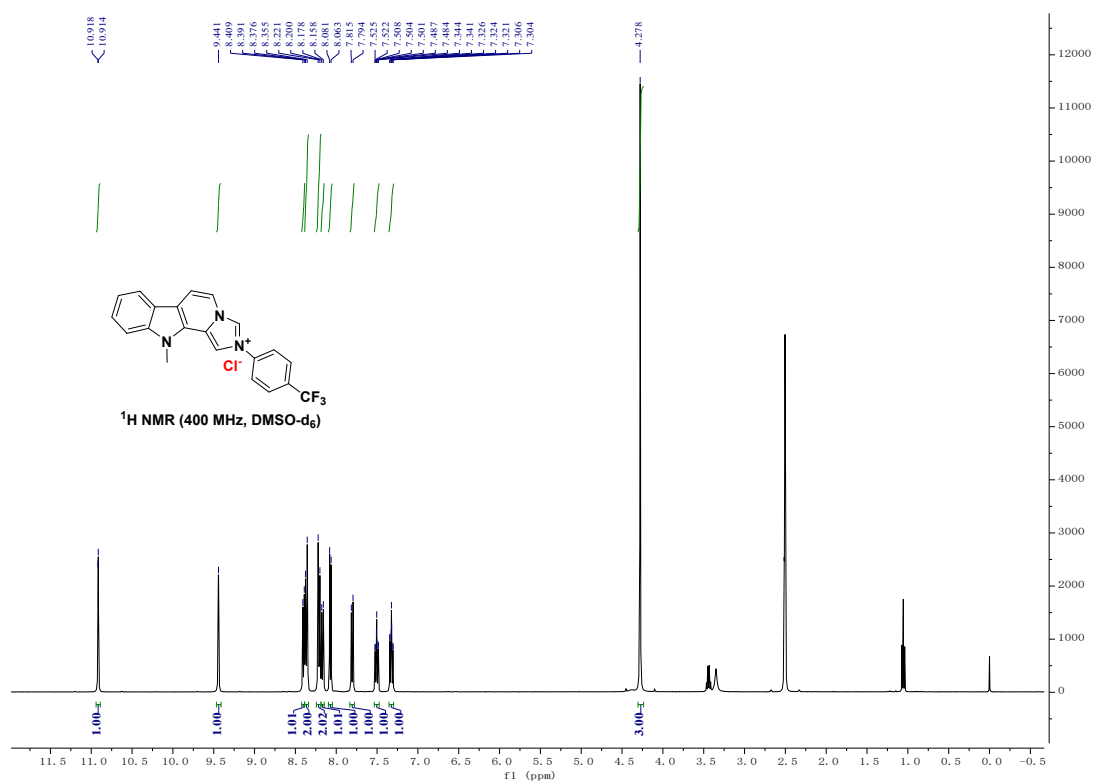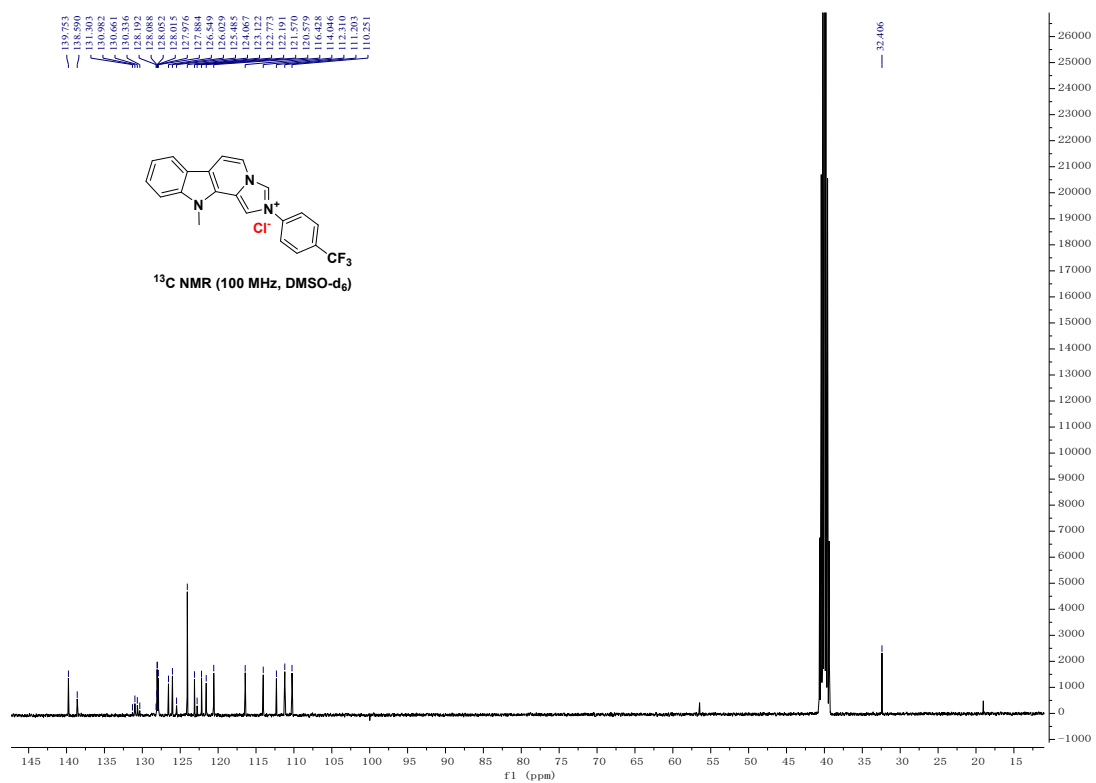

Figure S9-1 the <sup>1</sup>H NMR spectrum and <sup>13</sup>C NMR spectrum of compound **3i**

119 #12 RT: 0.16 AV: 1 NL: 1.69E8  
T: FTMS + p ESI Full ms [150.00-2000.00]

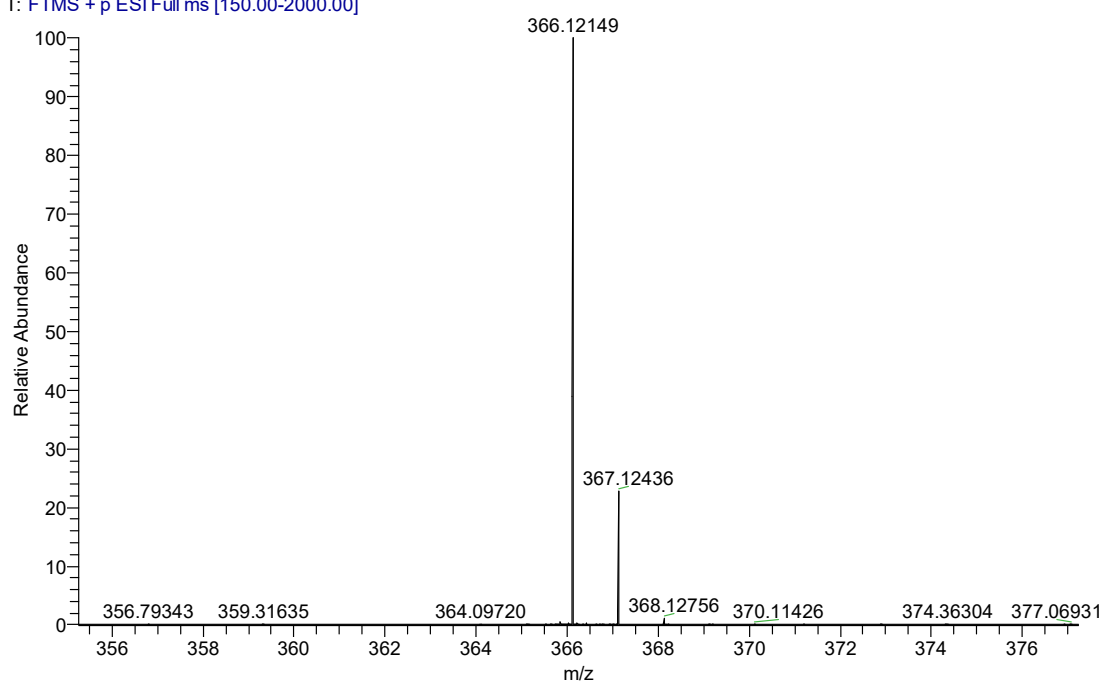

**Figure S9-2** the HRMS data of compound **3i**

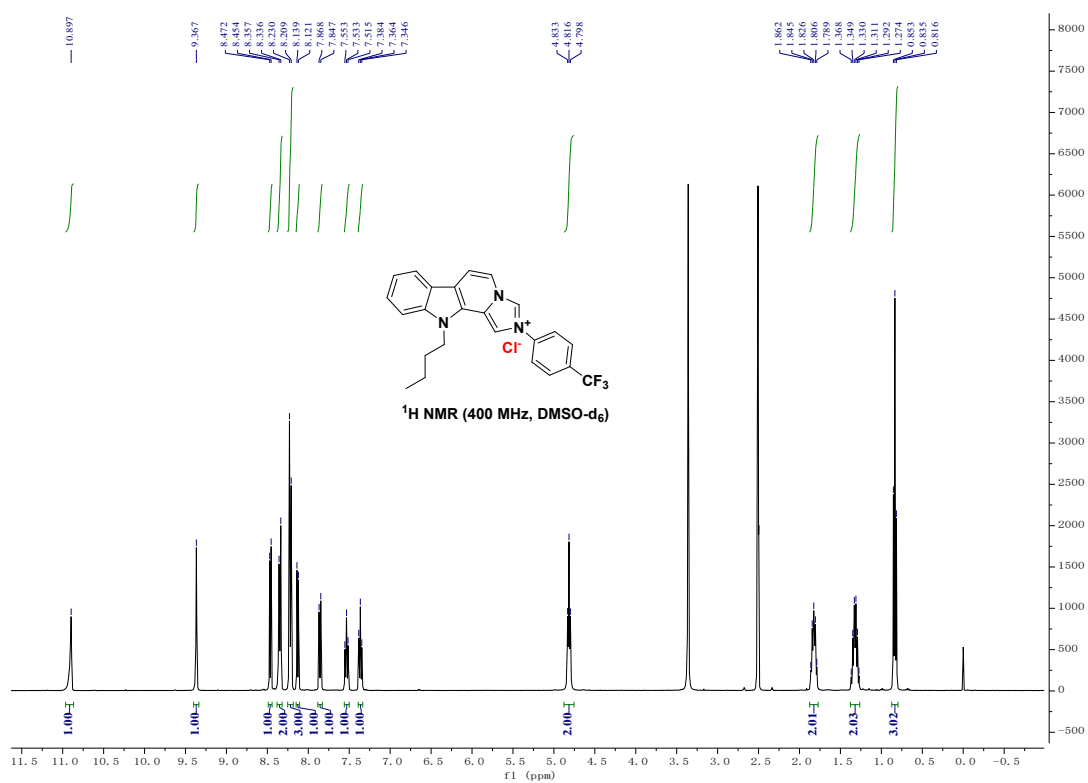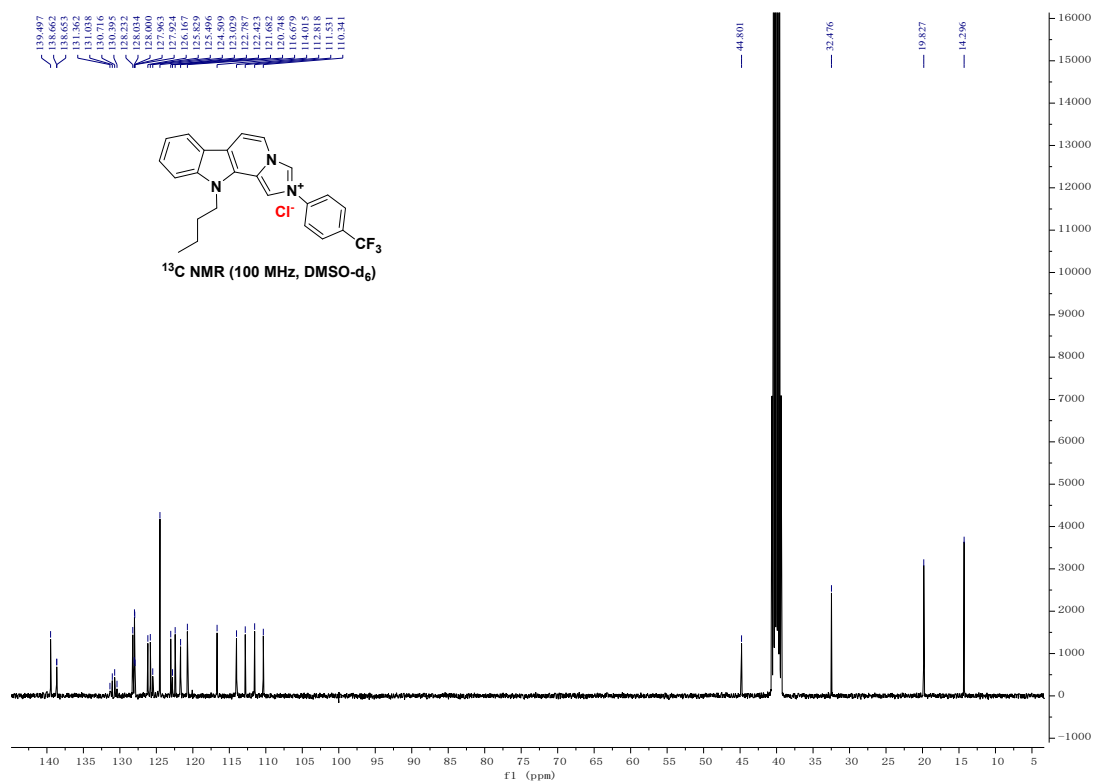

Figure S10-1 the <sup>1</sup>H NMR spectrum and <sup>13</sup>C NMR spectrum of compound **3j**

120 #10 RT: 0.13 AV: 1 NL: 1.05E9  
T: FTMS + p ESI Full ms [150.00-2000.00]

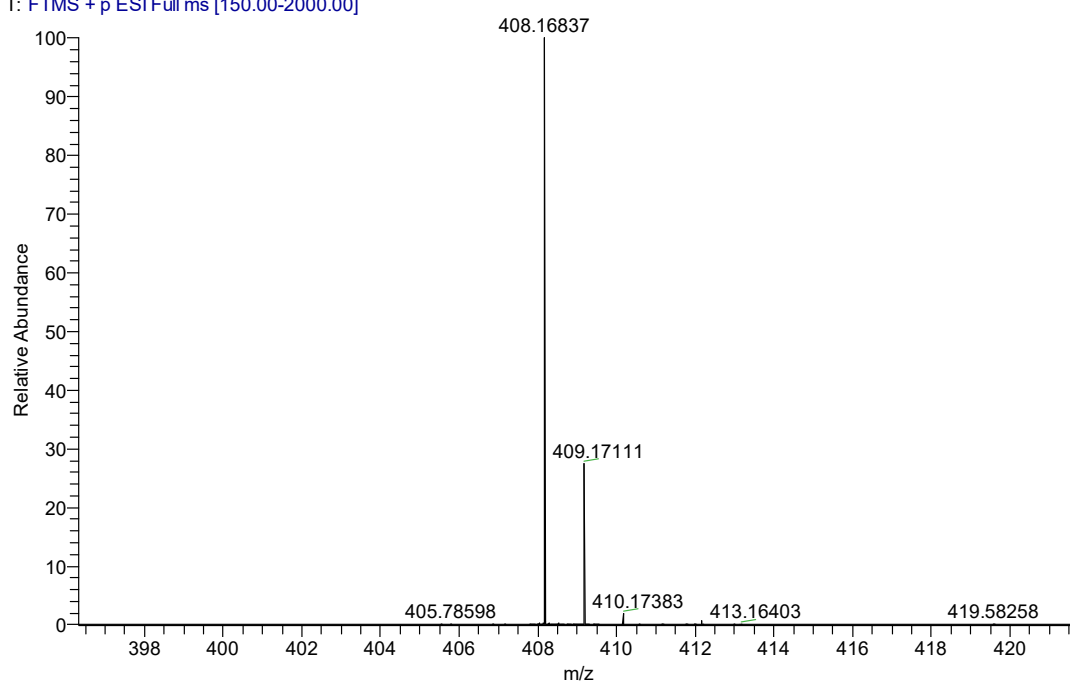

**Figure S10-2** the HRMS data of compound **3j**

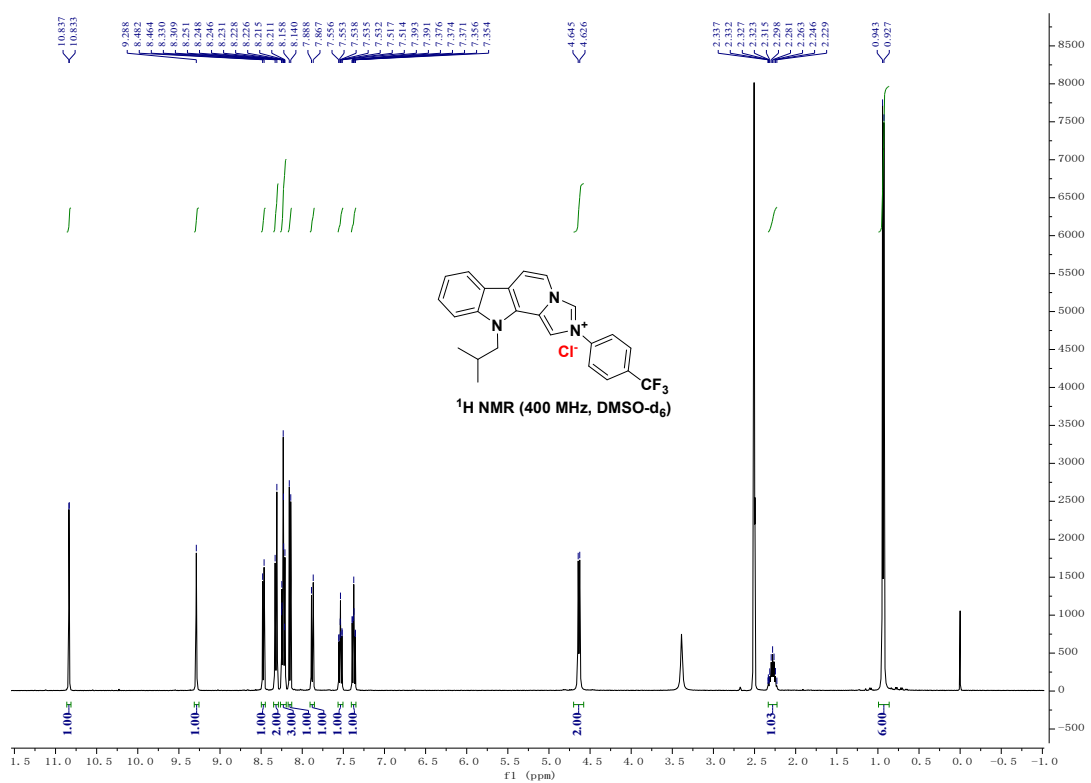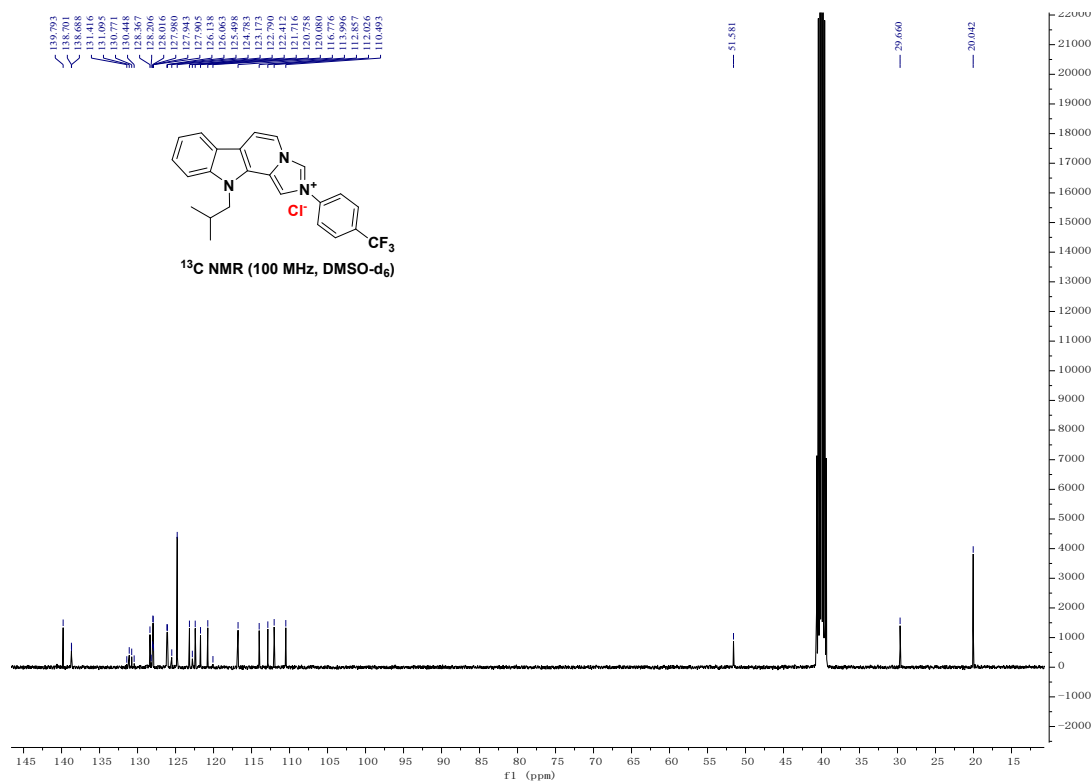

Figure S11-1 the <sup>1</sup>H NMR spectrum and <sup>13</sup>C NMR spectrum of compound 3k

121 #11 RT: 0.14 AV: 1 NL: 6.11E8  
T: FTMS + p ESI Full ms [150.00-2000.00]

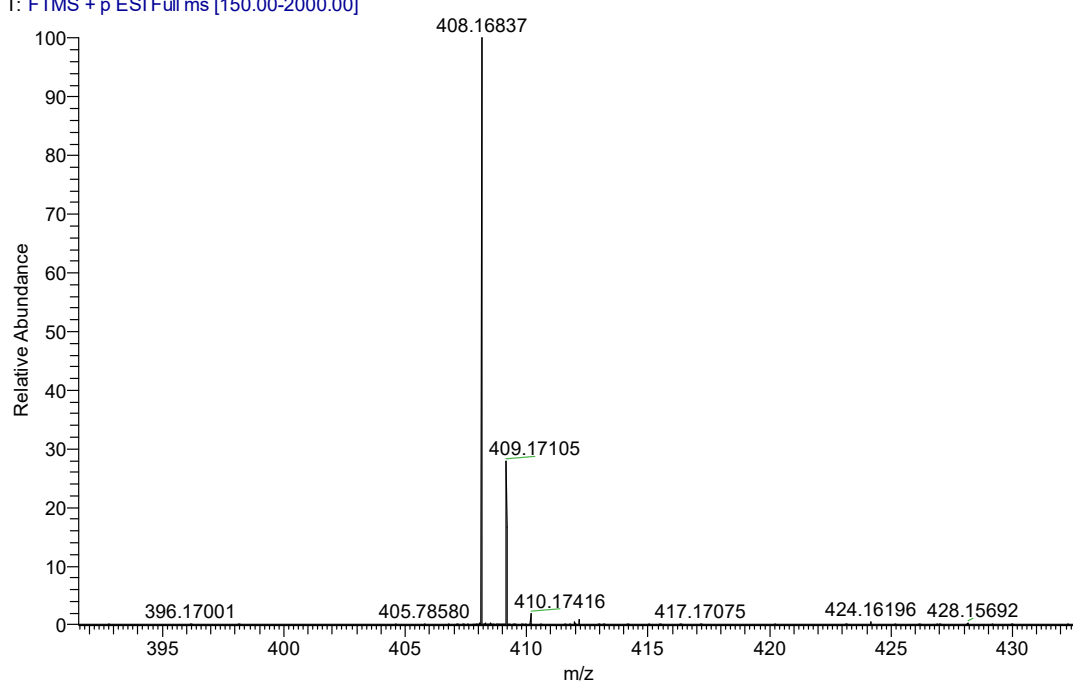

**Figure S11-2** the HRMS data of compound **3k**

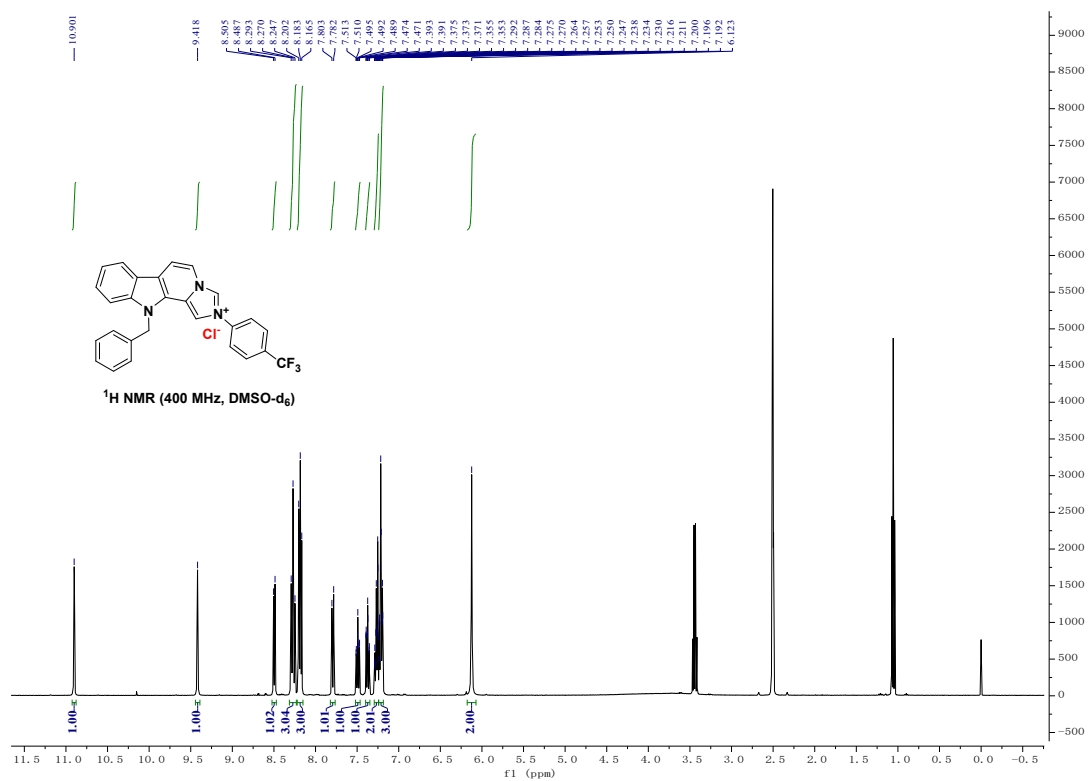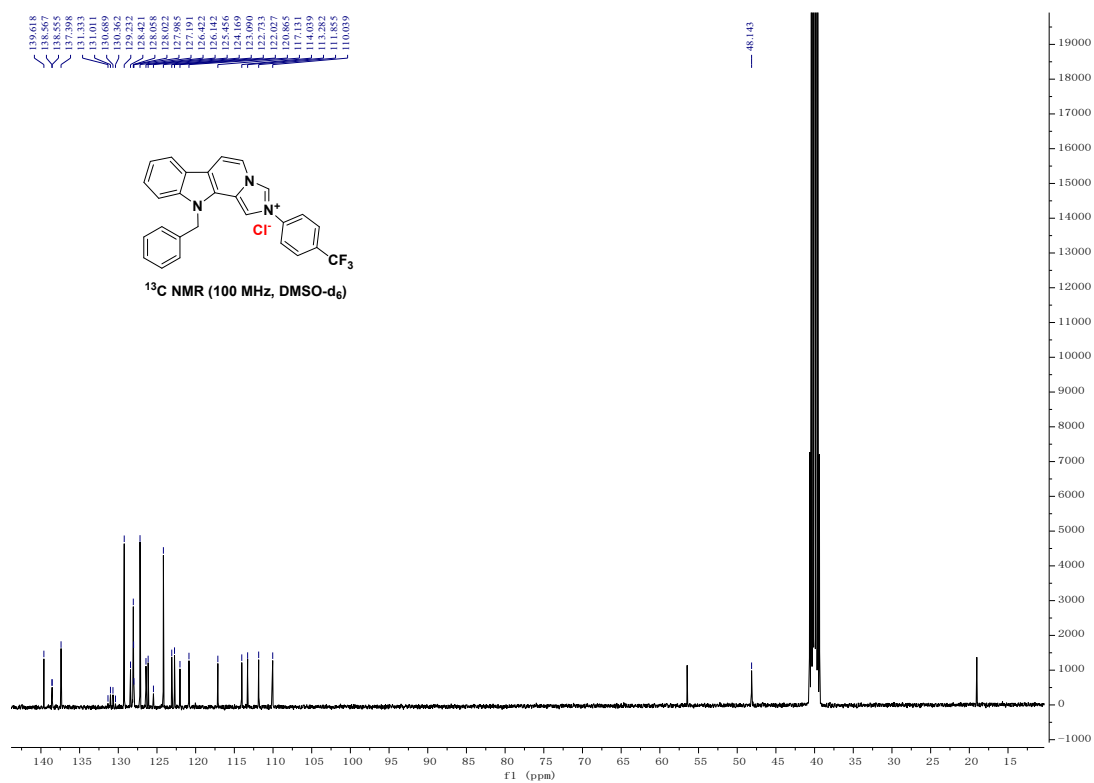

Figure S12-1 the <sup>1</sup>H NMR spectrum and <sup>13</sup>C NMR spectrum of compound 31



115 #10 RT: 0.12 AV: 1 NL: 7.00E8  
T: FTMS + p ESI Full ms [150.00-2000.00]

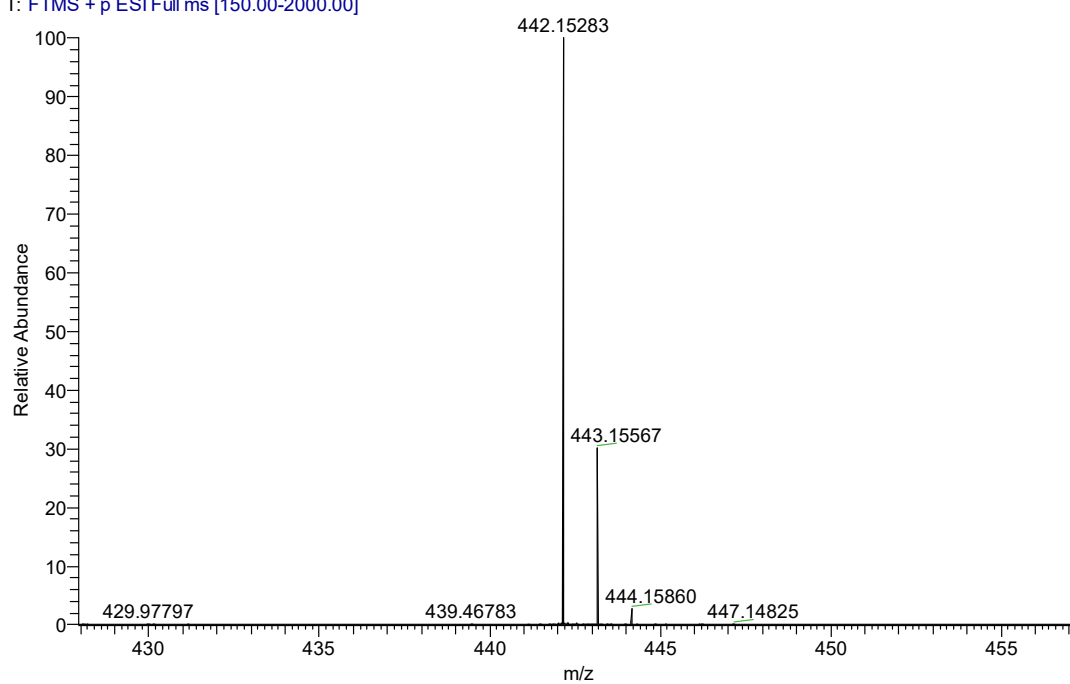

**Figure S12-2** the HRMS data of compound **31**

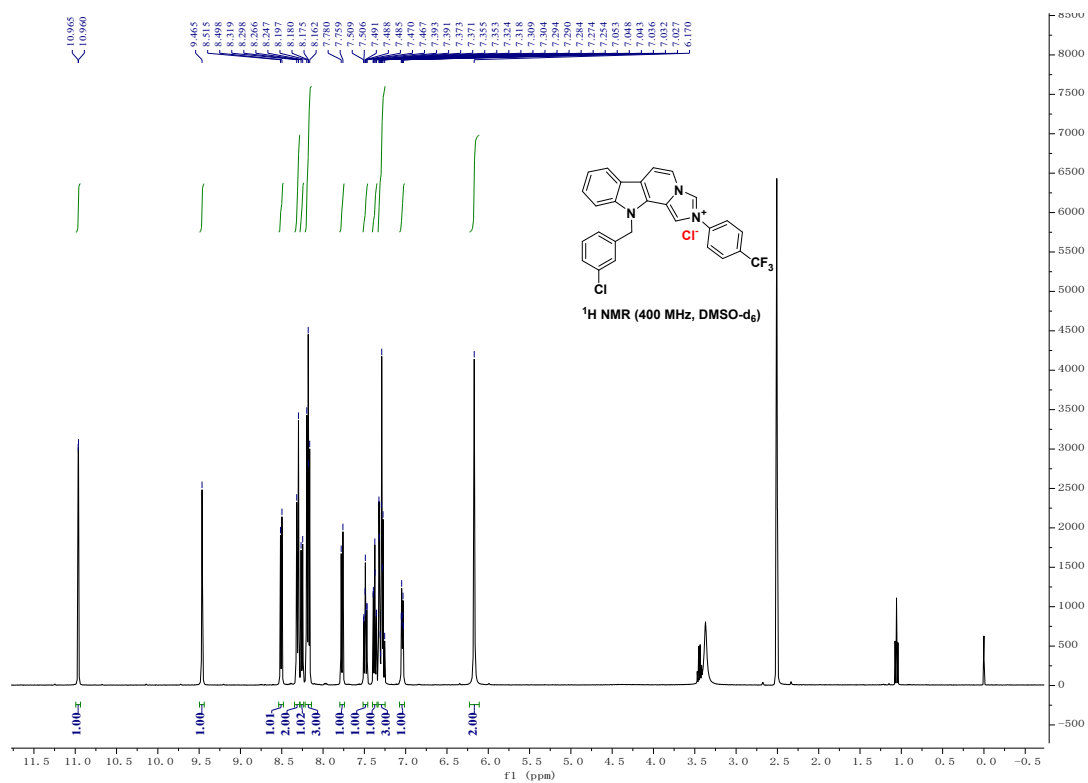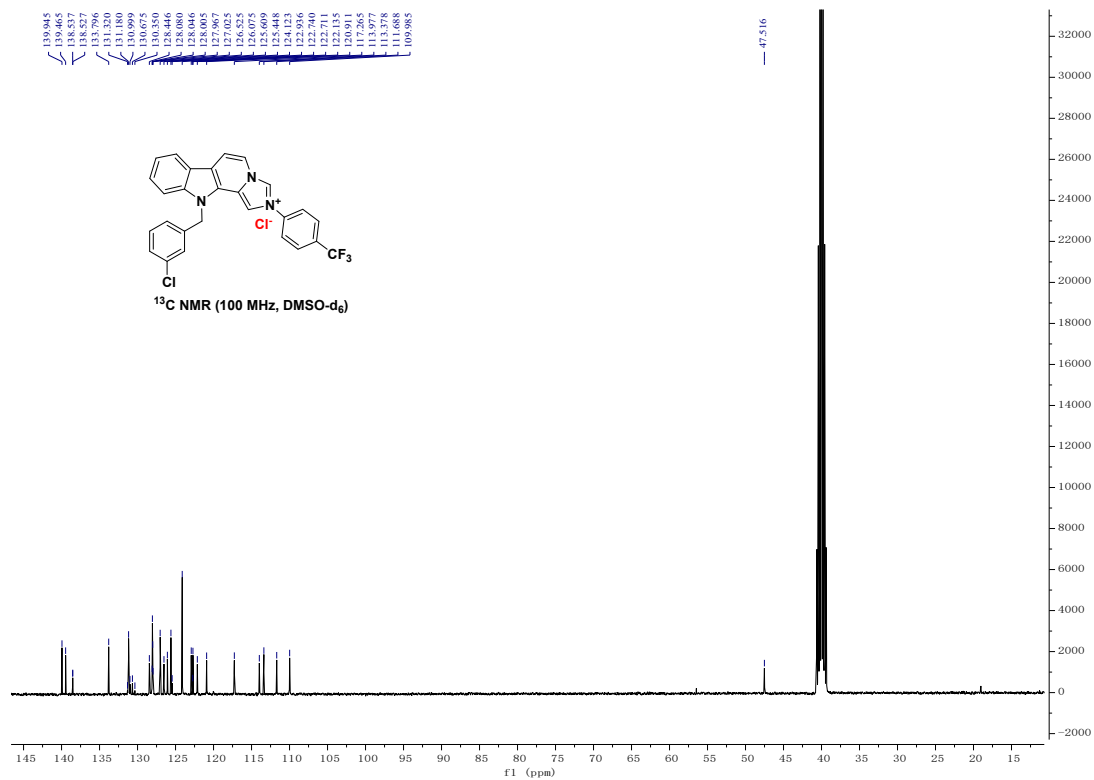

Figure S13-1 the <sup>1</sup>H NMR spectrum and <sup>13</sup>C NMR spectrum of compound **3m**

117 #20 RT: 0.27 AV: 1 NL: 4.62E7  
T: FTMS + p ESI Full ms [150.00-2000.00]

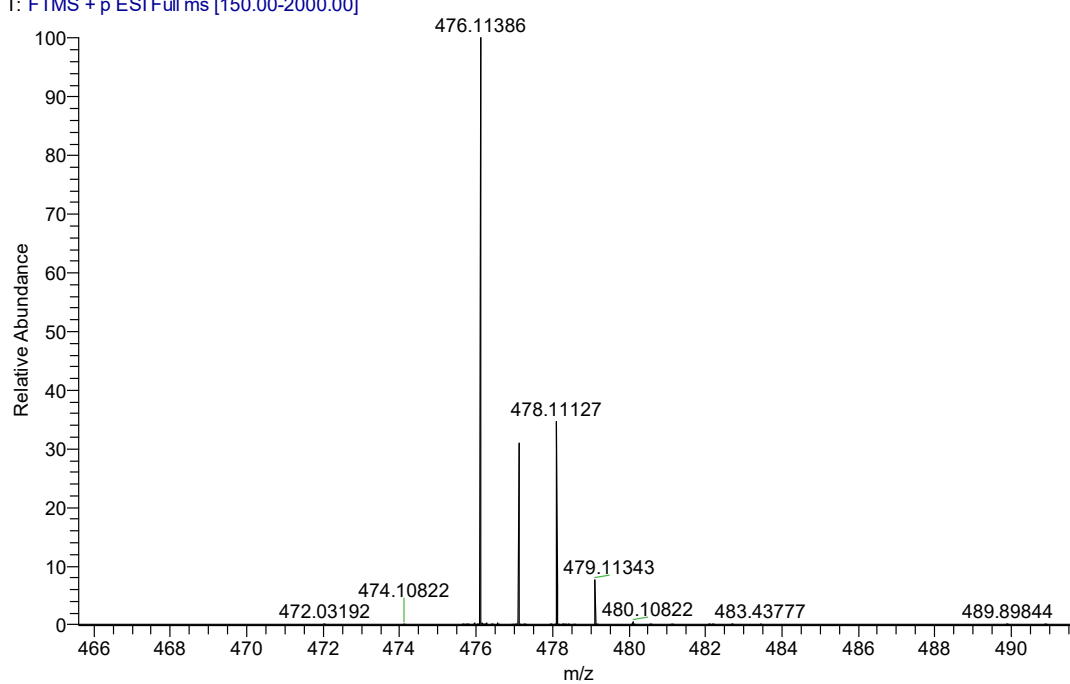

**Figure S13-2** the HRMS data of compound **3m**

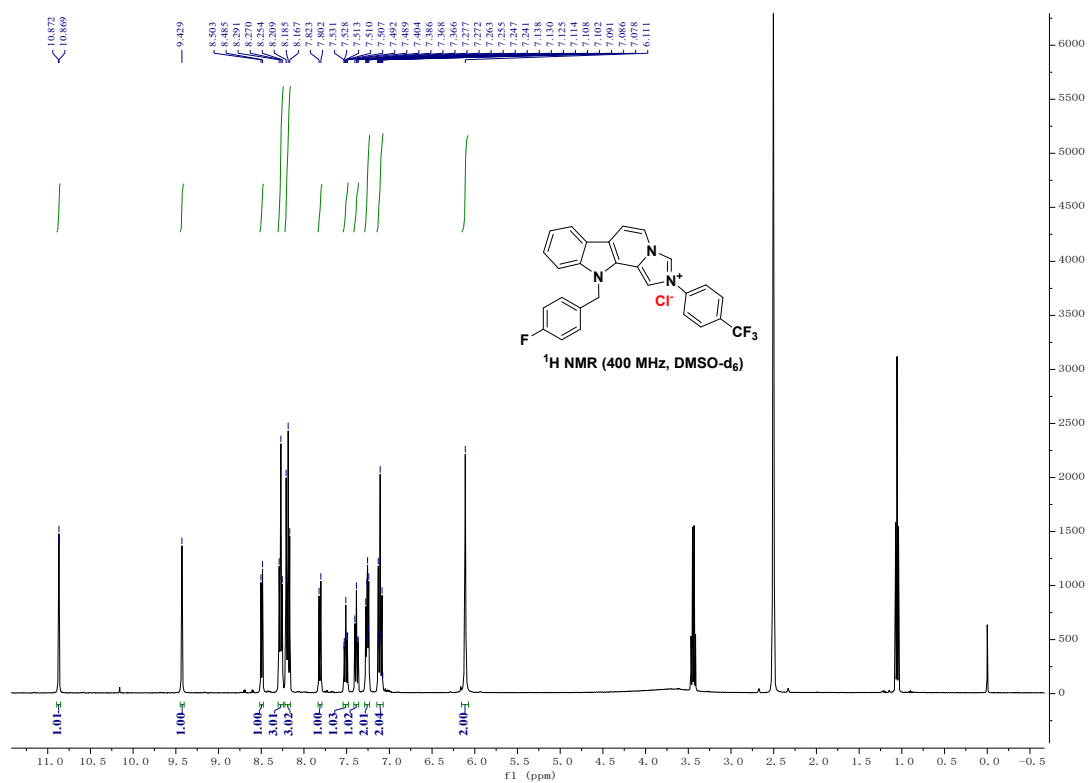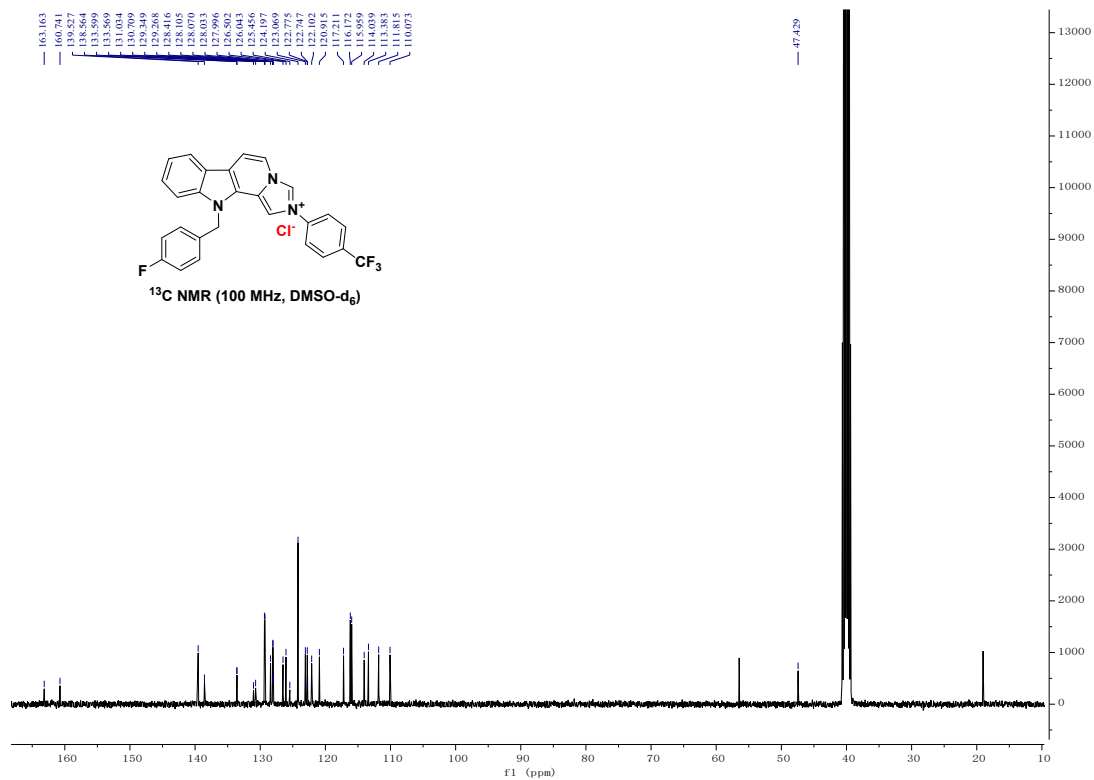

Figure S14-1 the <sup>1</sup>H NMR spectrum and <sup>13</sup>C NMR spectrum of compound 3n

116 #11 RT: 0.14 AV: 1 NL: 4.28E8  
T: FTMS + p ESI Full ms [150.00-2000.00]

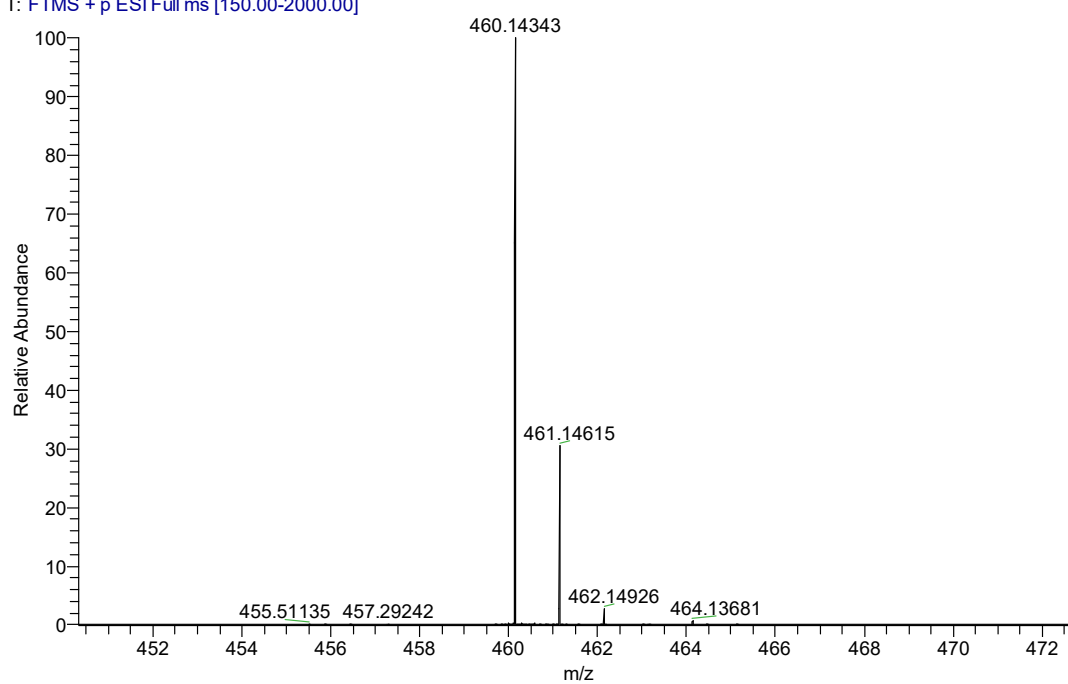

**Figure S14-2** the HRMS data of compound **3n**

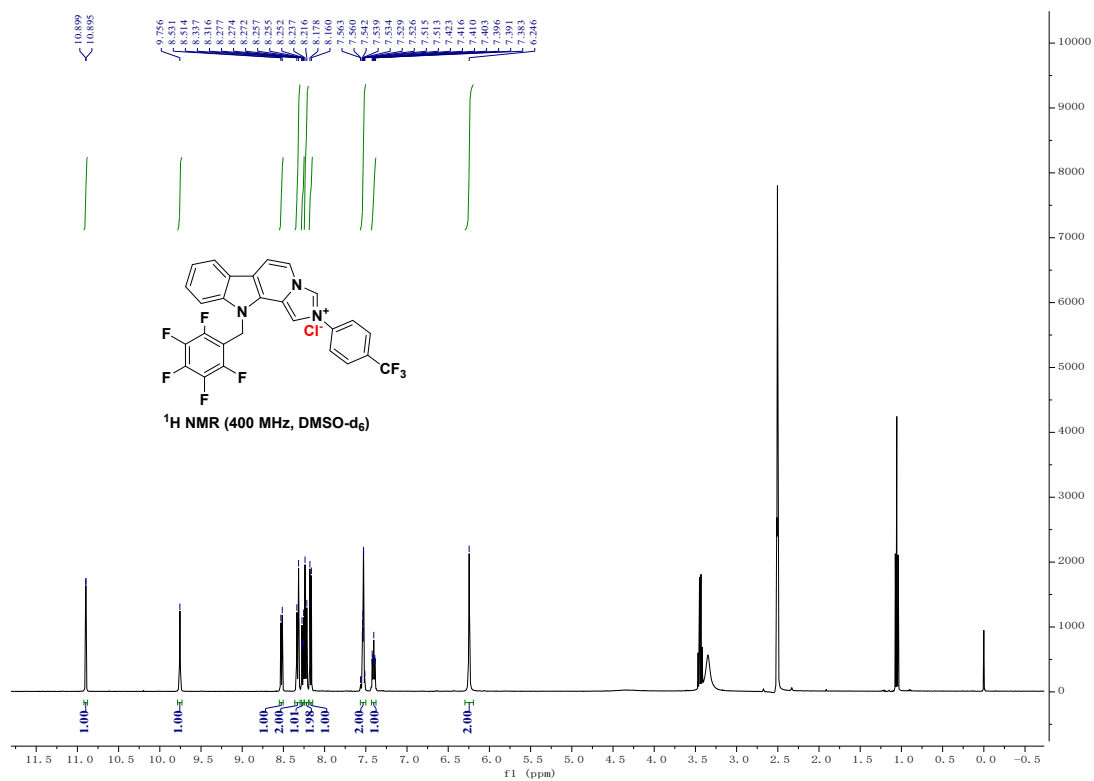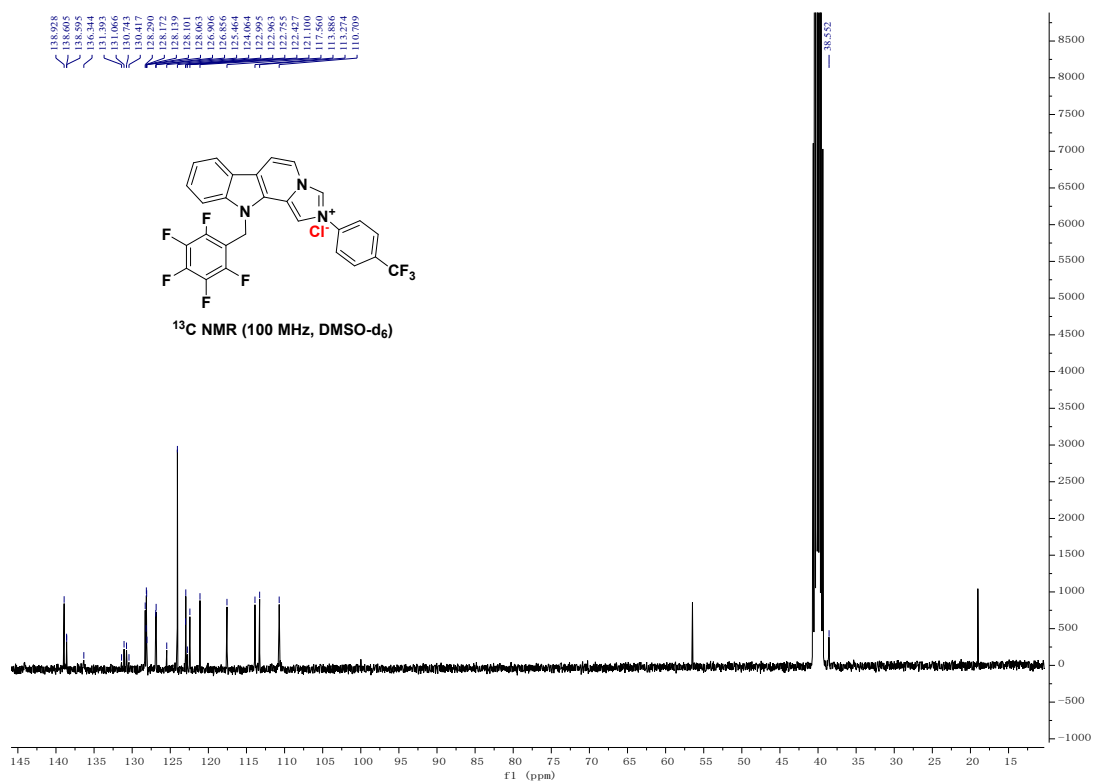

Figure S15-1 the <sup>1</sup>H NMR spectrum and <sup>13</sup>C NMR spectrum of compound **30**

118 #10 RT: 0.13 AV: 1 NL: 7.83E8  
T: FTMS + p ESI Full ms [150.00-2000.00]

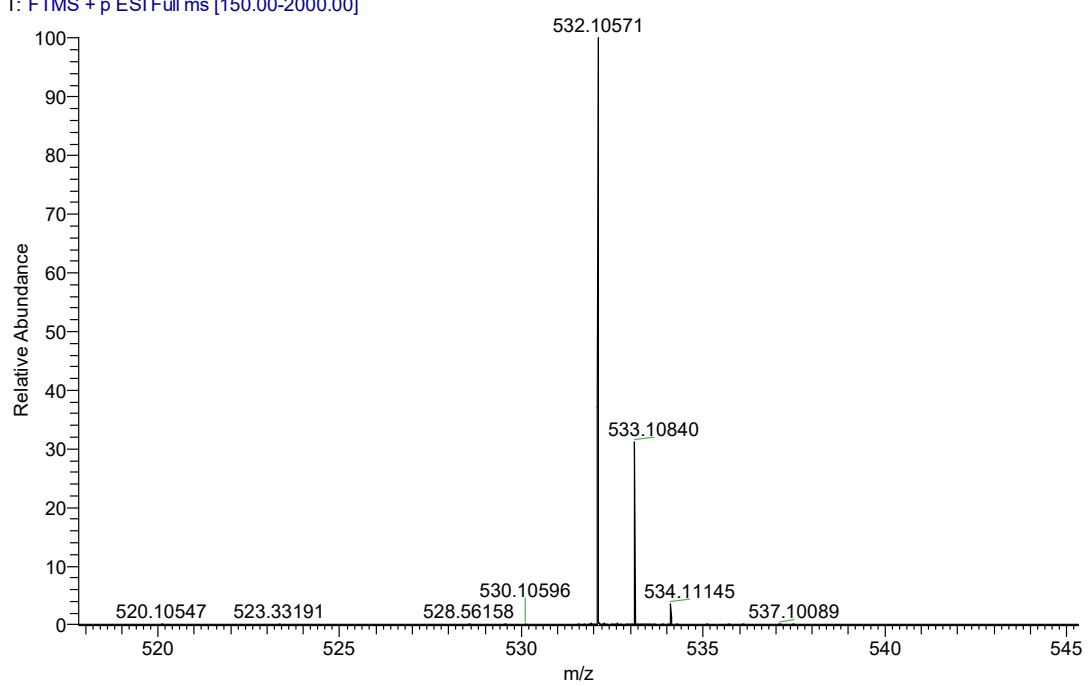

**Figure S15-2** the HRMS data of compound **3o**

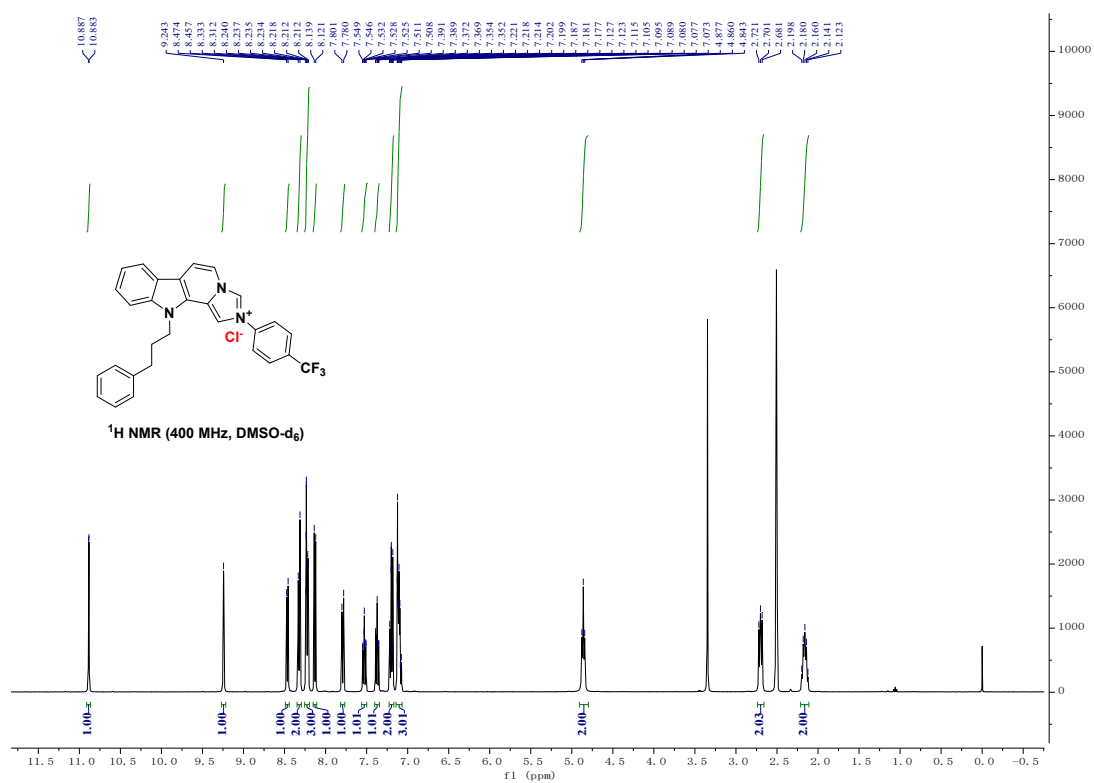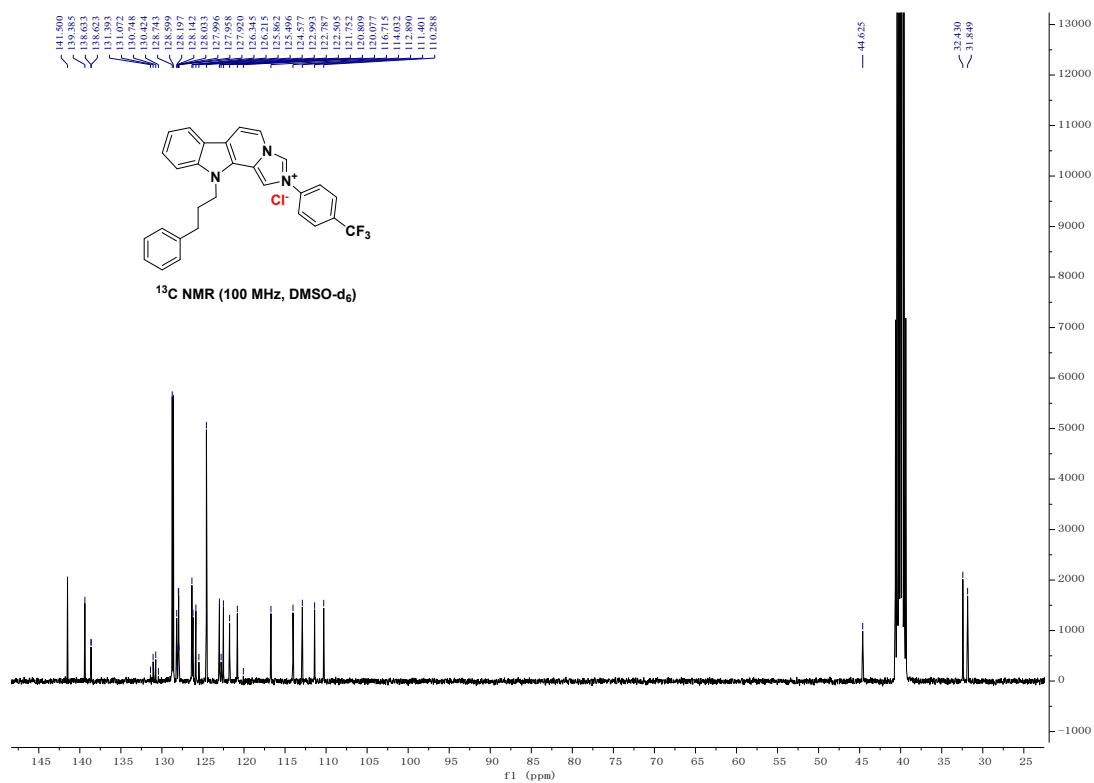

Figure S16-1 the <sup>1</sup>H NMR spectrum and <sup>13</sup>C NMR spectrum of compound 3p



128 #10 RT: 0.12 AV: 1 NL: 6.58E8  
T: FTMS + p ESI Full ms [150.00-2000.00]

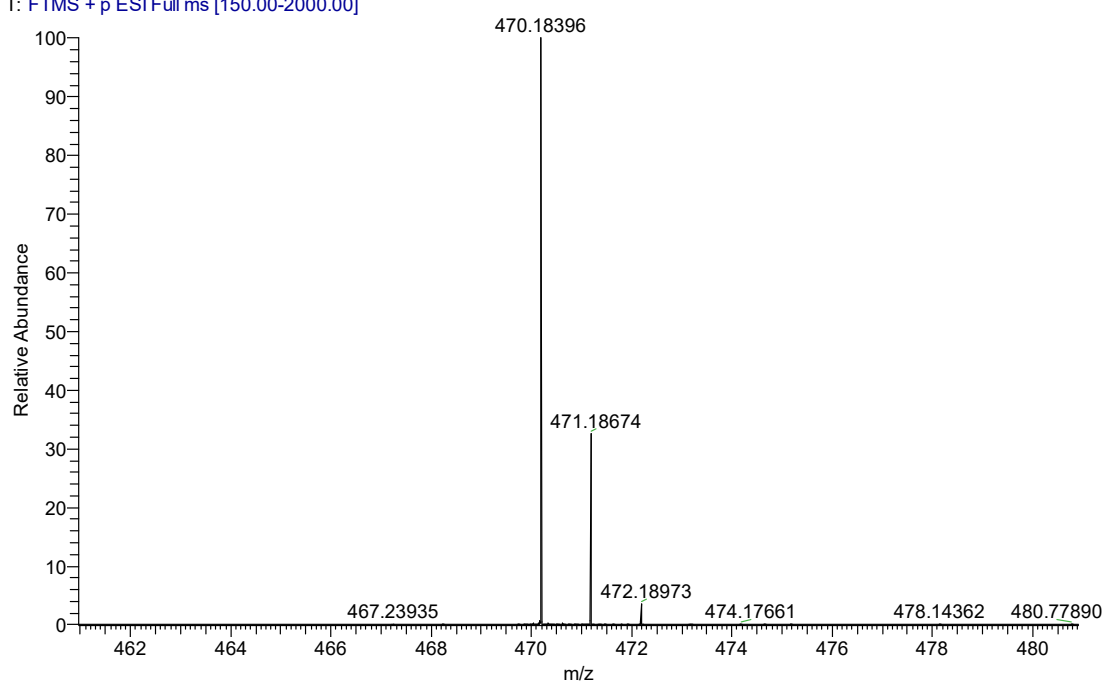

**Figure S16-2** the HRMS data of compound **3p**

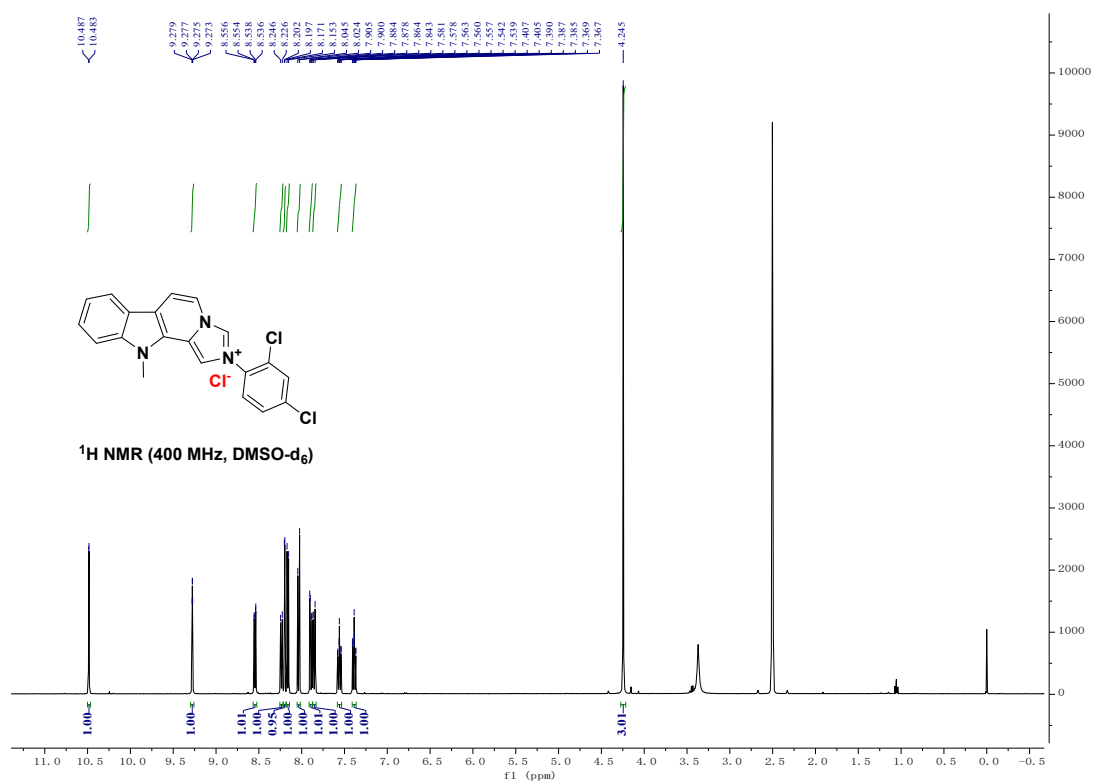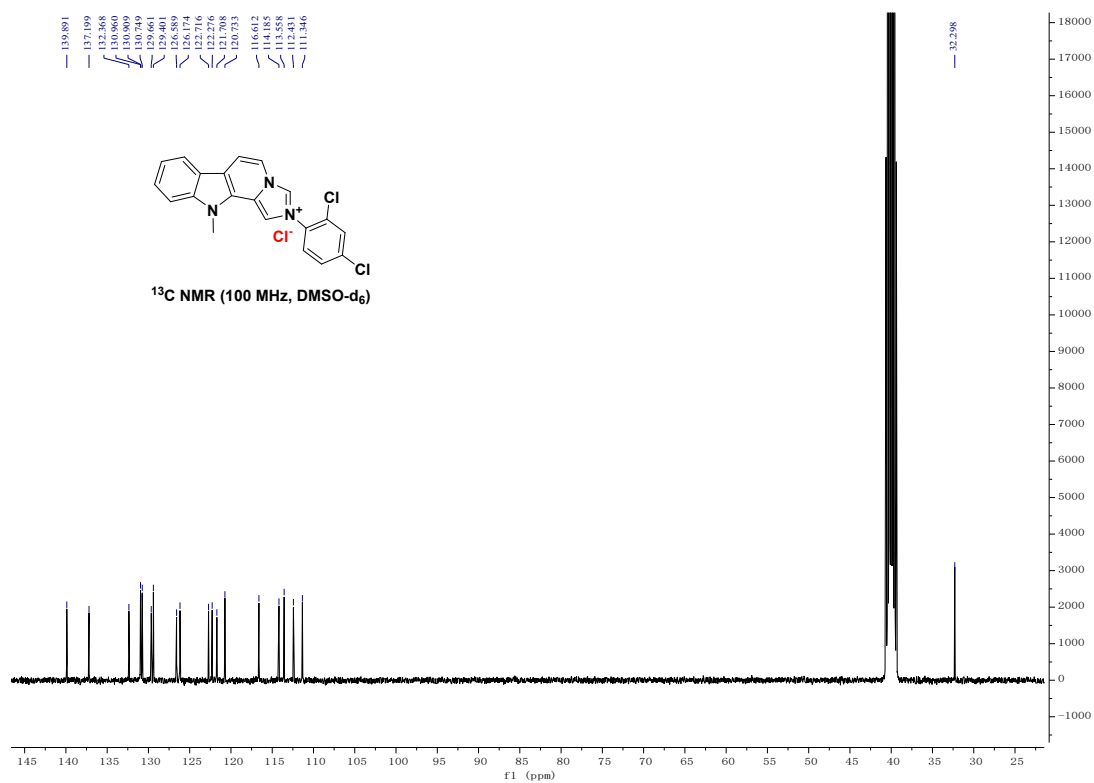

Figure S17-1 the <sup>1</sup>H NMR spectrum and <sup>13</sup>C NMR spectrum of compound 3q

124 #11 RT: 0.14 AV: 1 NL: 2.44E8  
T: FTMS + p ESI Full ms [150.00-2000.00]

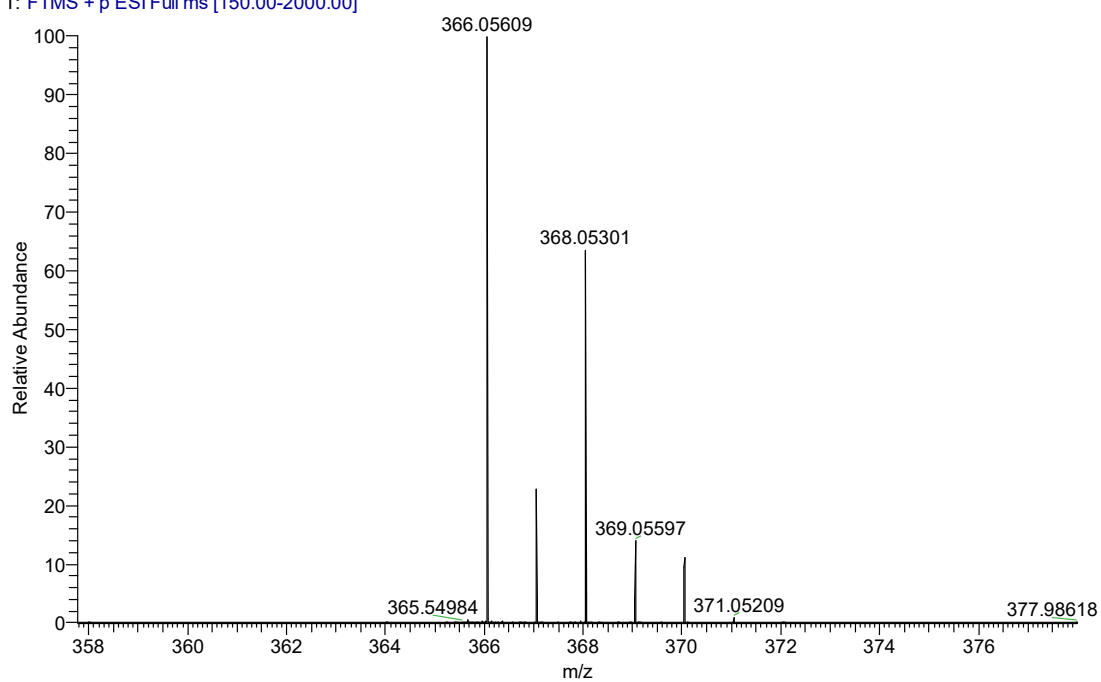

**Figure S17-2** the HRMS data of compound **3q**

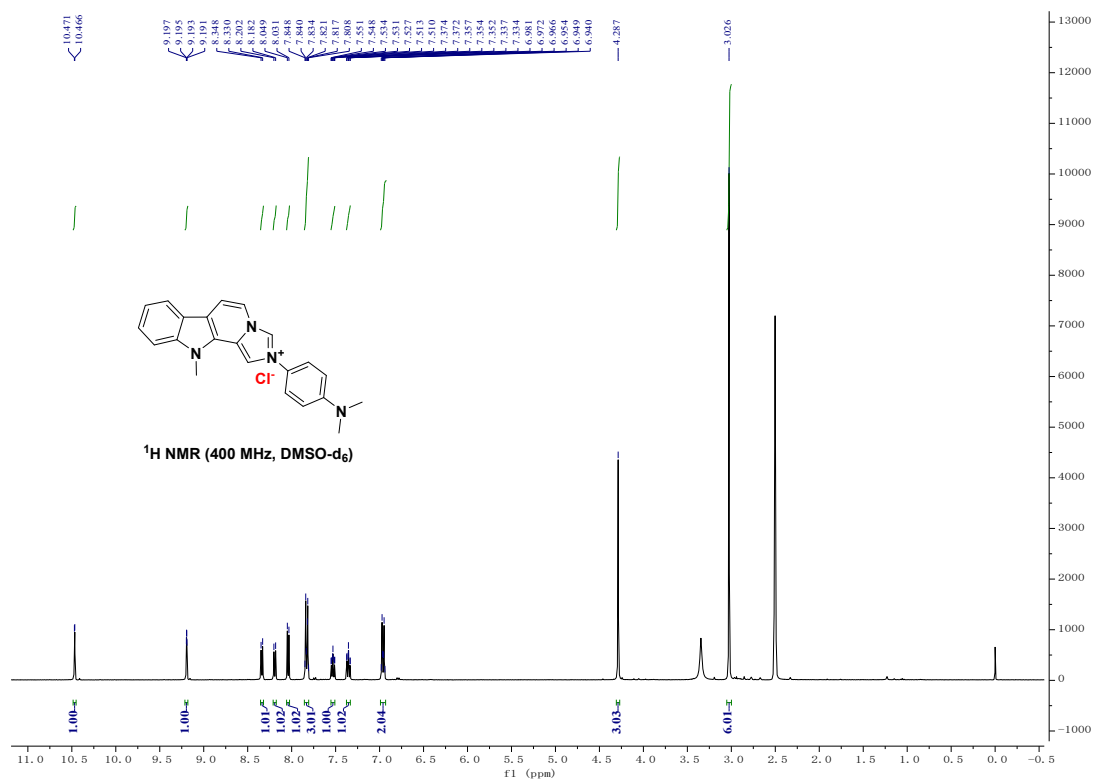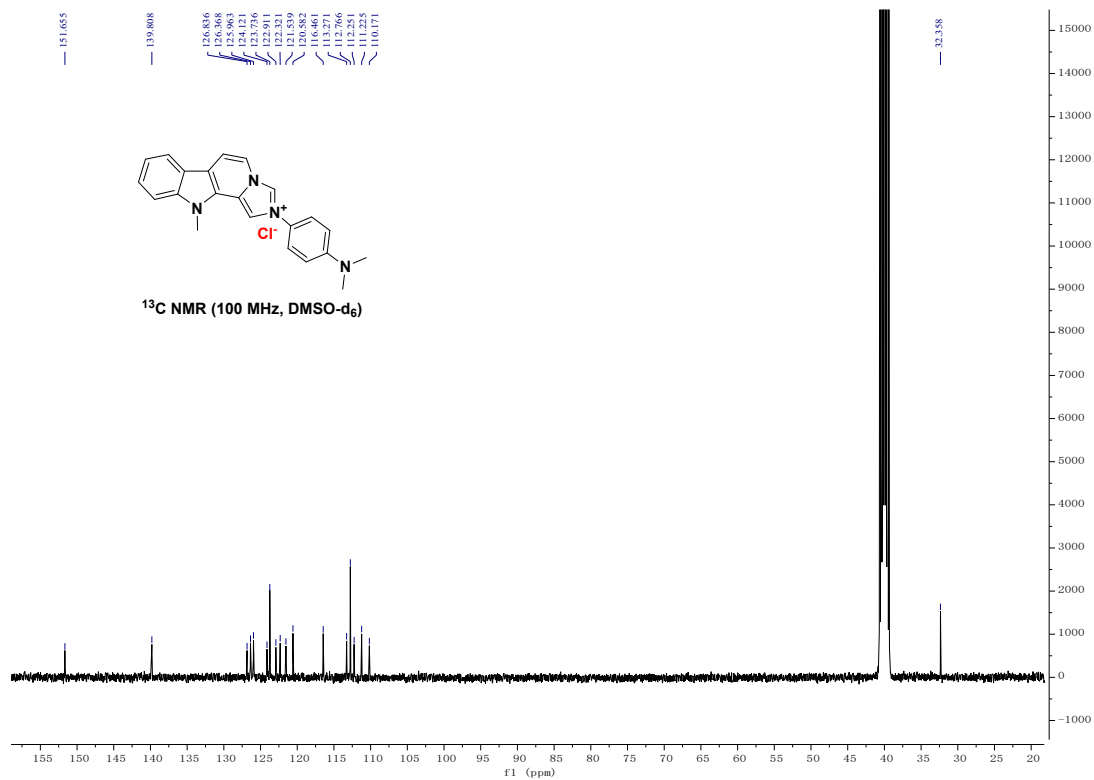

Figure S18-1 the <sup>1</sup>H NMR spectrum and <sup>13</sup>C NMR spectrum of compound 3r

125 #12 RT: 0.15 AV: 1 NL: 1.89E8  
T: FTMS + p ESI Full ms [150.00-2000.00]

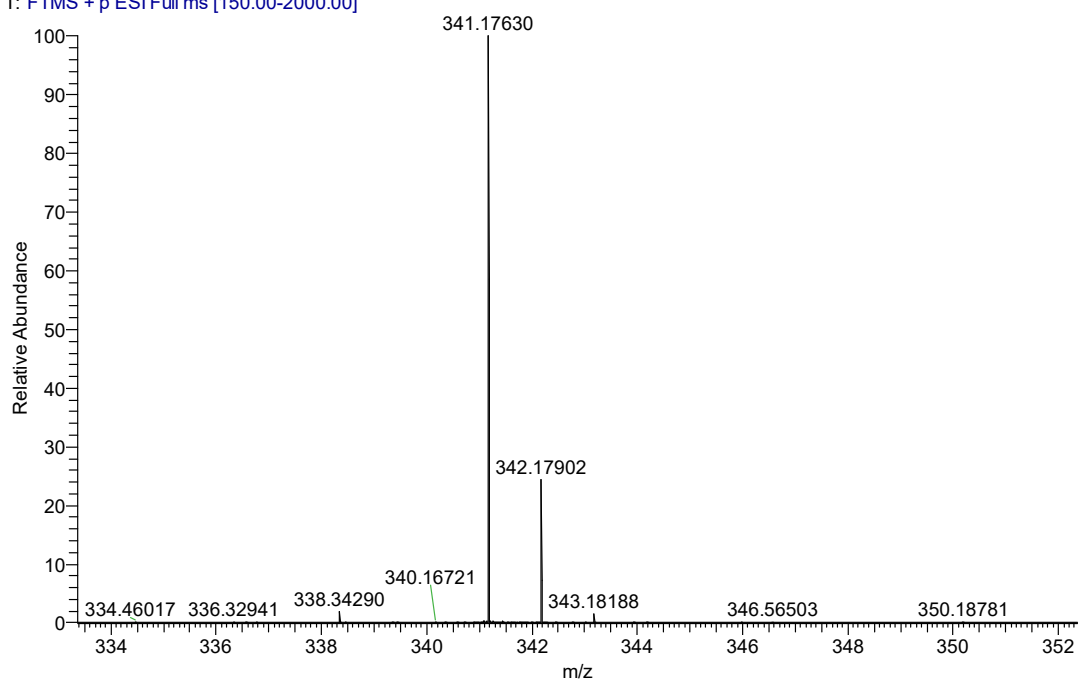

**Figure S18-2** the HRMS data of compound **3r**

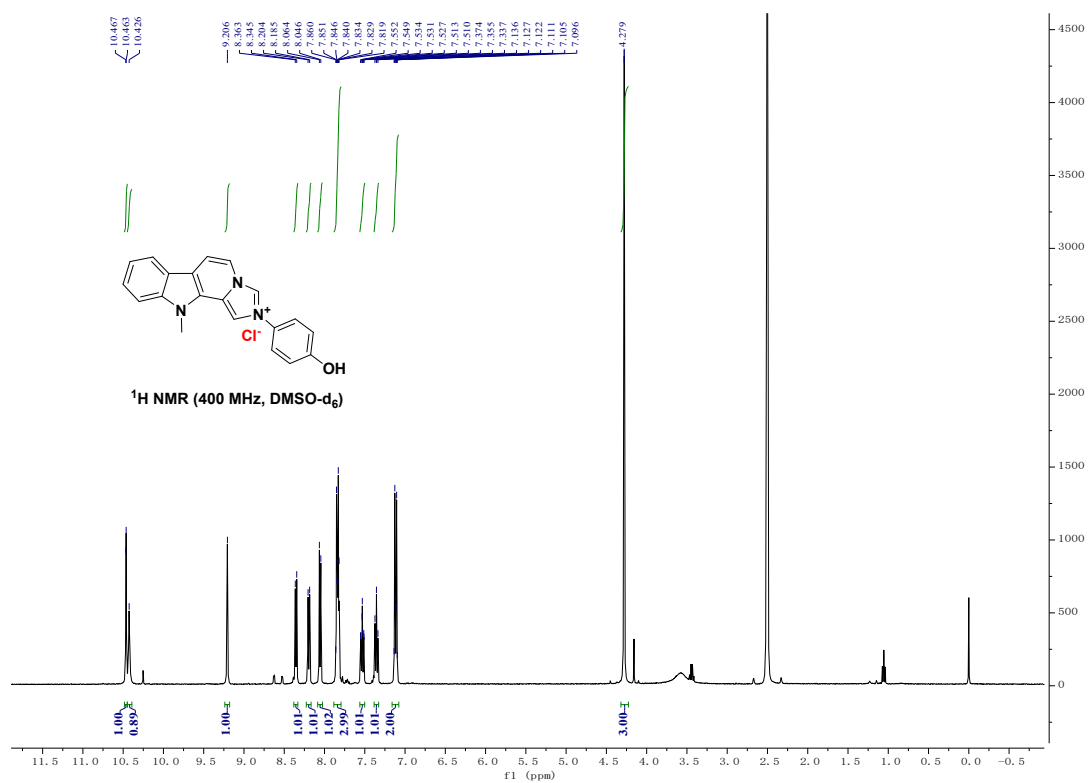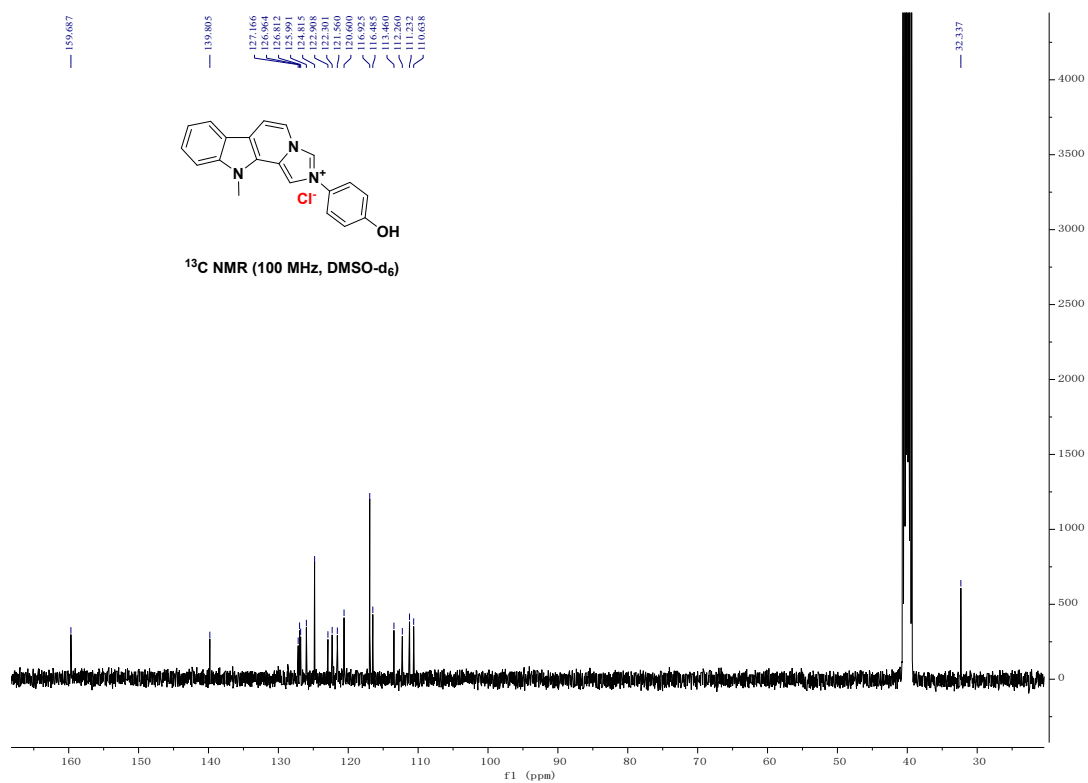

Figure S19-1 the <sup>1</sup>H NMR spectrum and <sup>13</sup>C NMR spectrum of compound 3s

64 #16 RT: 0.21 AV: 1 NL: 2.49E7  
T: FTMS + p ESI Full ms [150.00-2000.00]

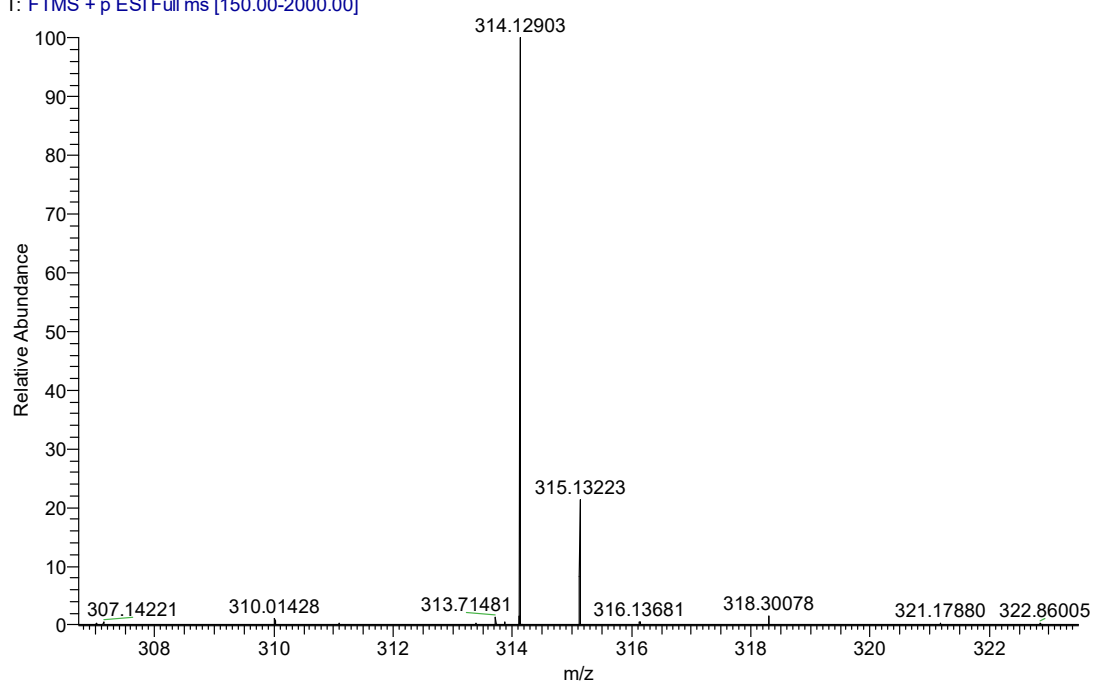

**Figure S19-2** the HRMS data of compound **3s**

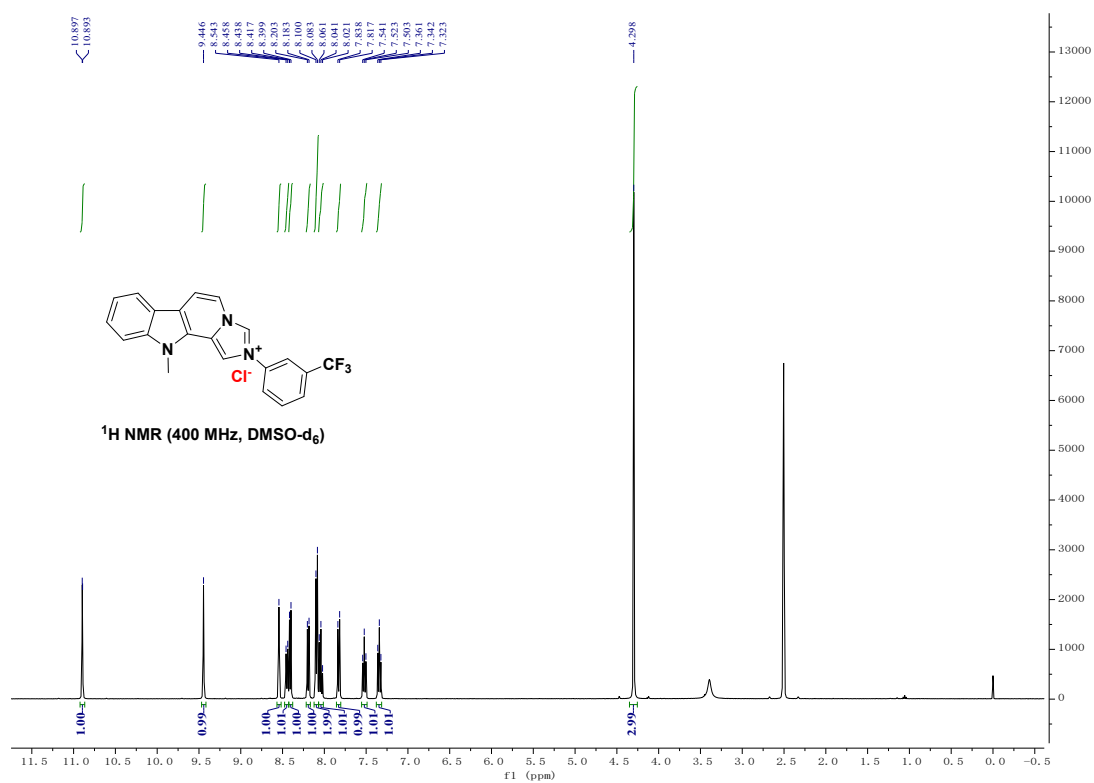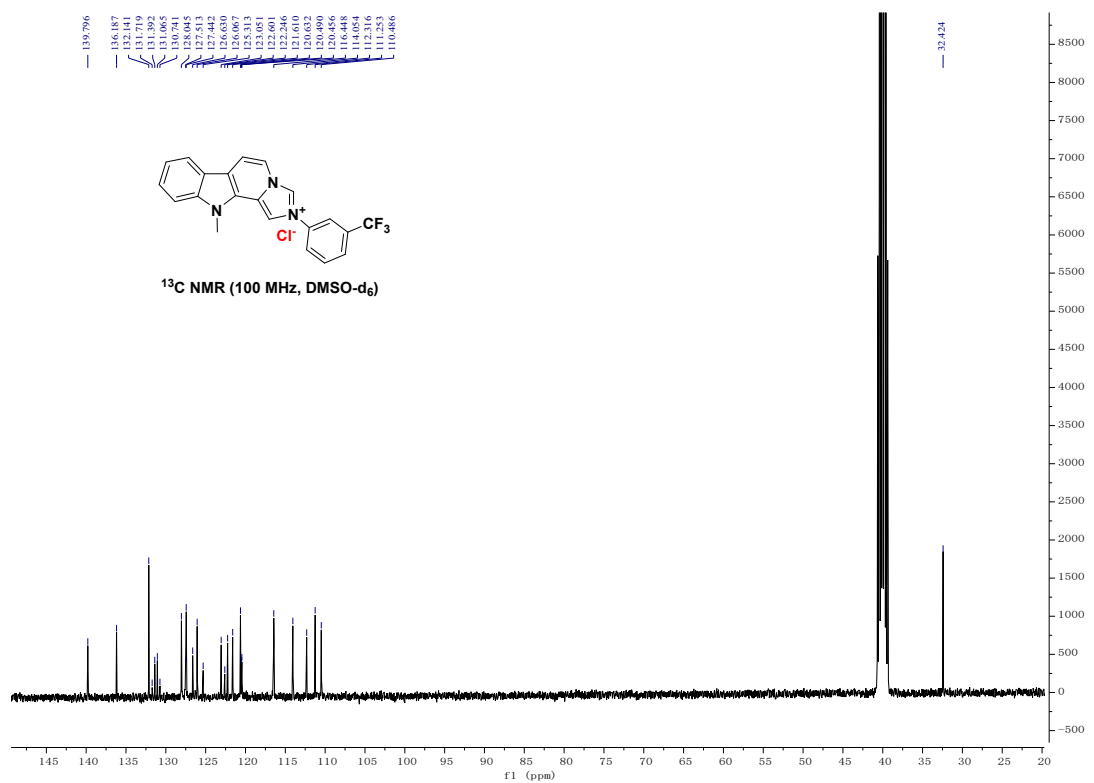

Figure S20-1 the <sup>1</sup>H NMR spectrum and <sup>13</sup>C NMR spectrum of compound 3t



126 #10 RT: 0.12 AV: 1 NL: 5.02E8  
T: FTMS + p ESI Full ms [150.00-2000.00]

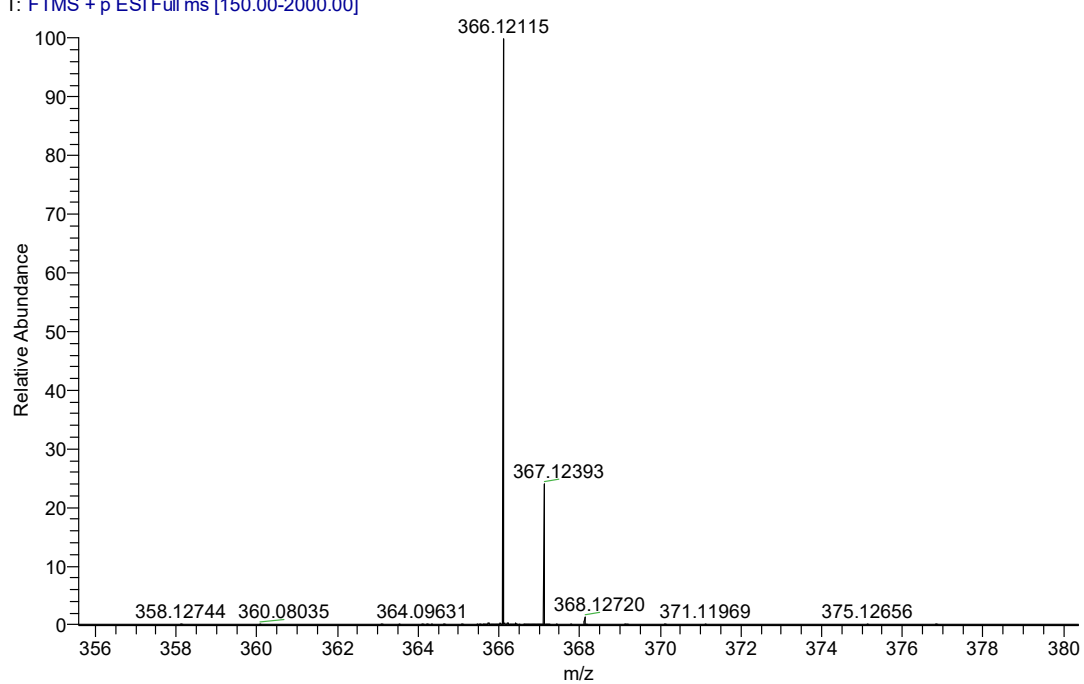

**Figure S20-2** the HRMS data of compound **3t**

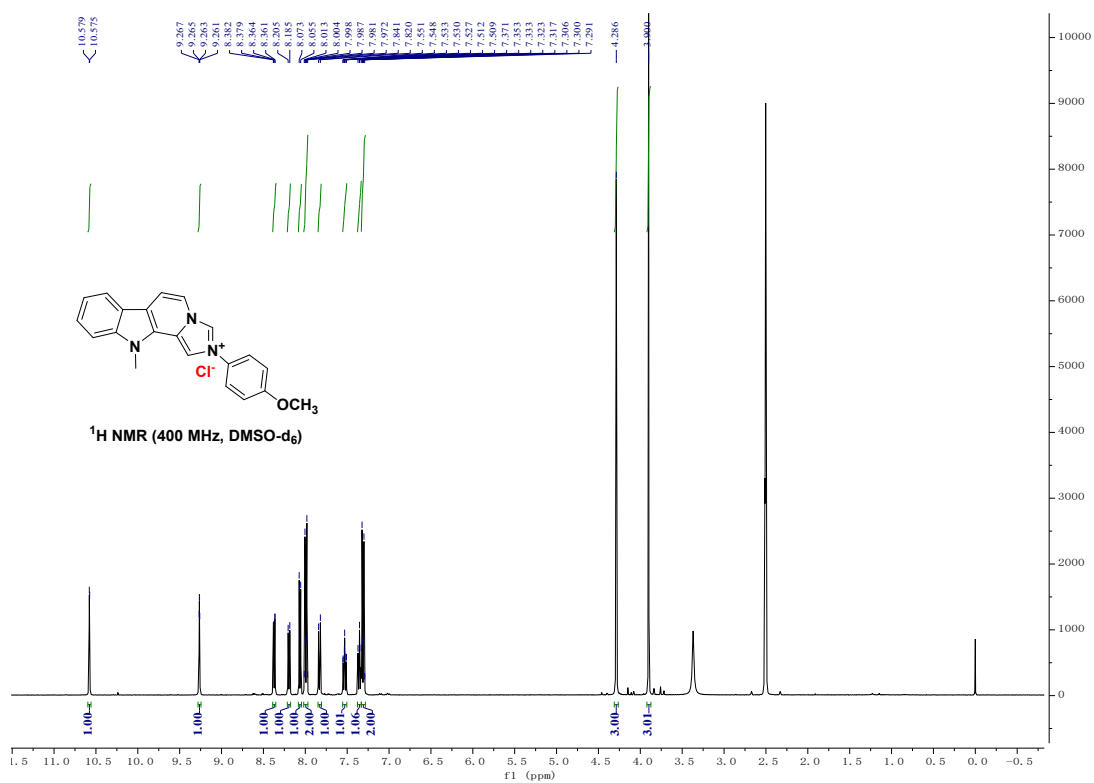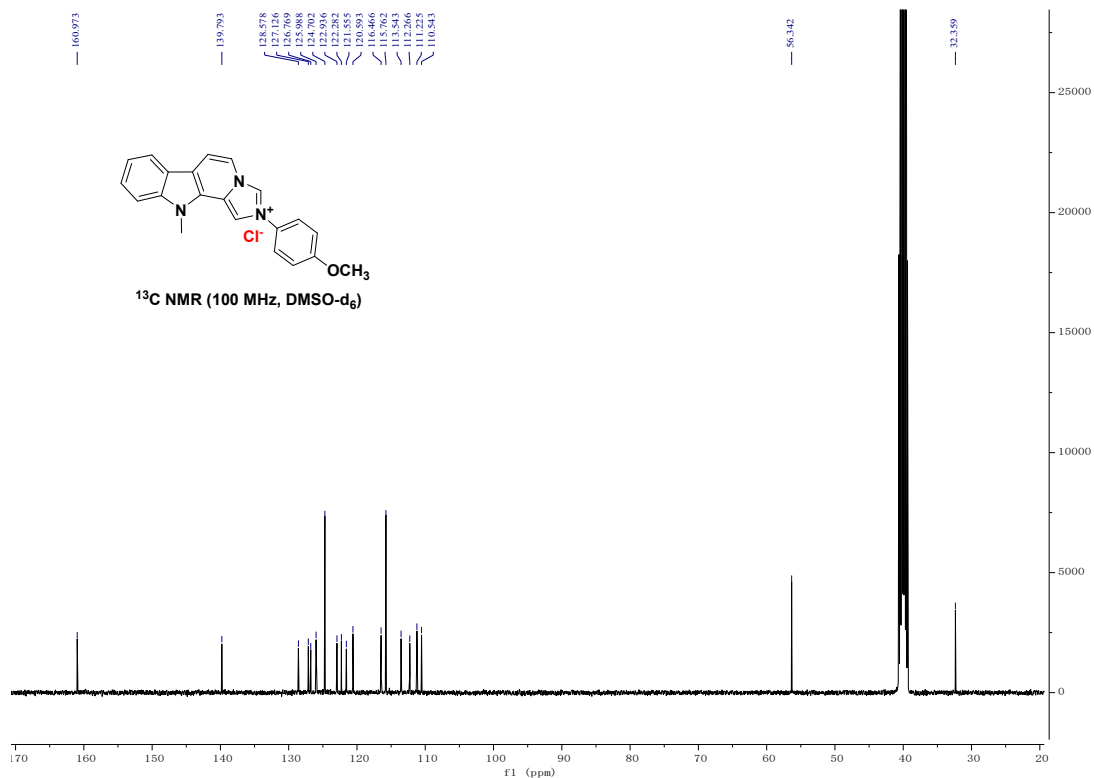

**Figure S21-1** the <sup>1</sup>H NMR spectrum and <sup>13</sup>C NMR spectrum of compound **3u**

129 #11 RT: 0.14 AV: 1 NL: 2.50E8  
T: FTMS + p ESI Full ms [150.00-2000.00]

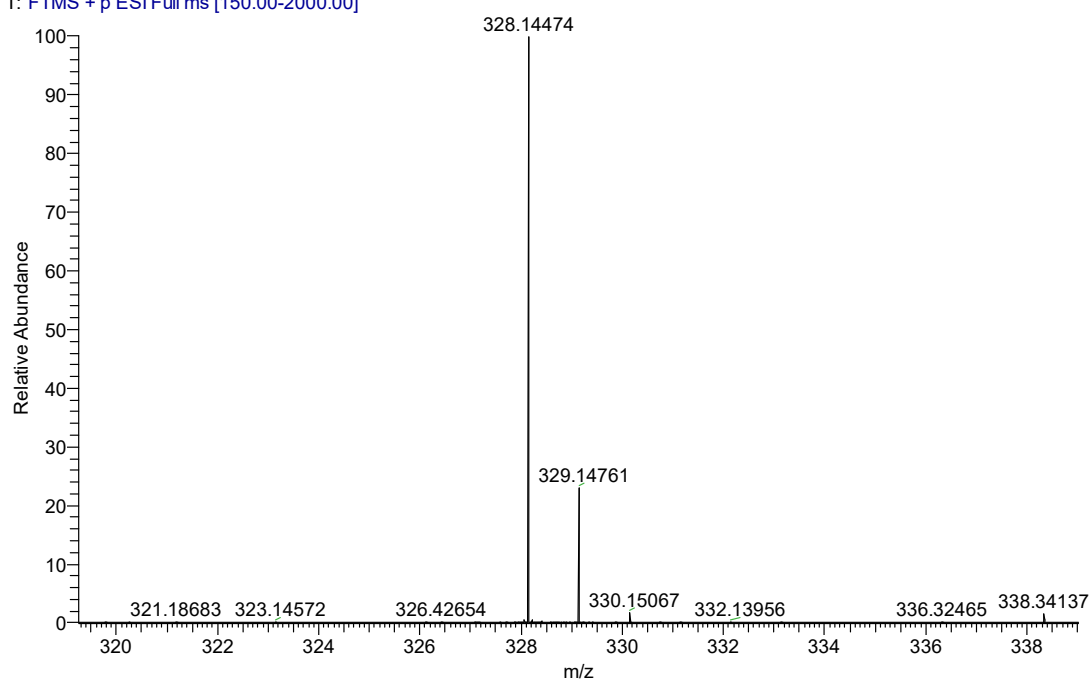

**Figure S21-2** the HRMS data of compound **3u**

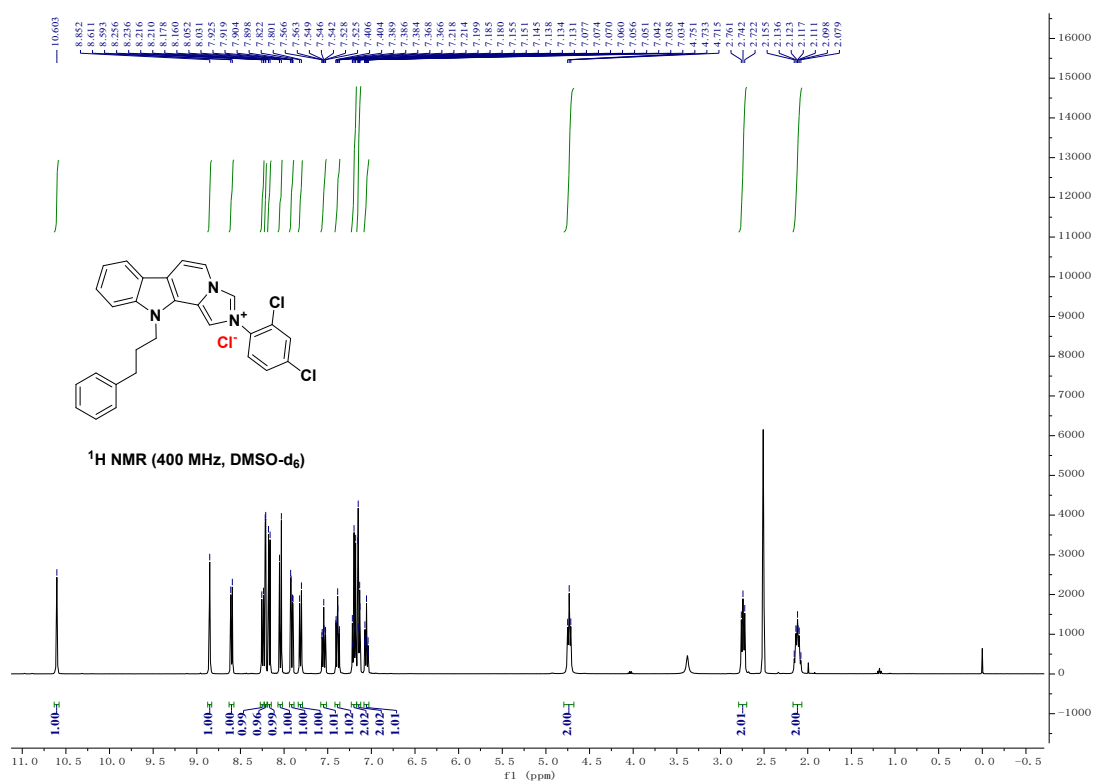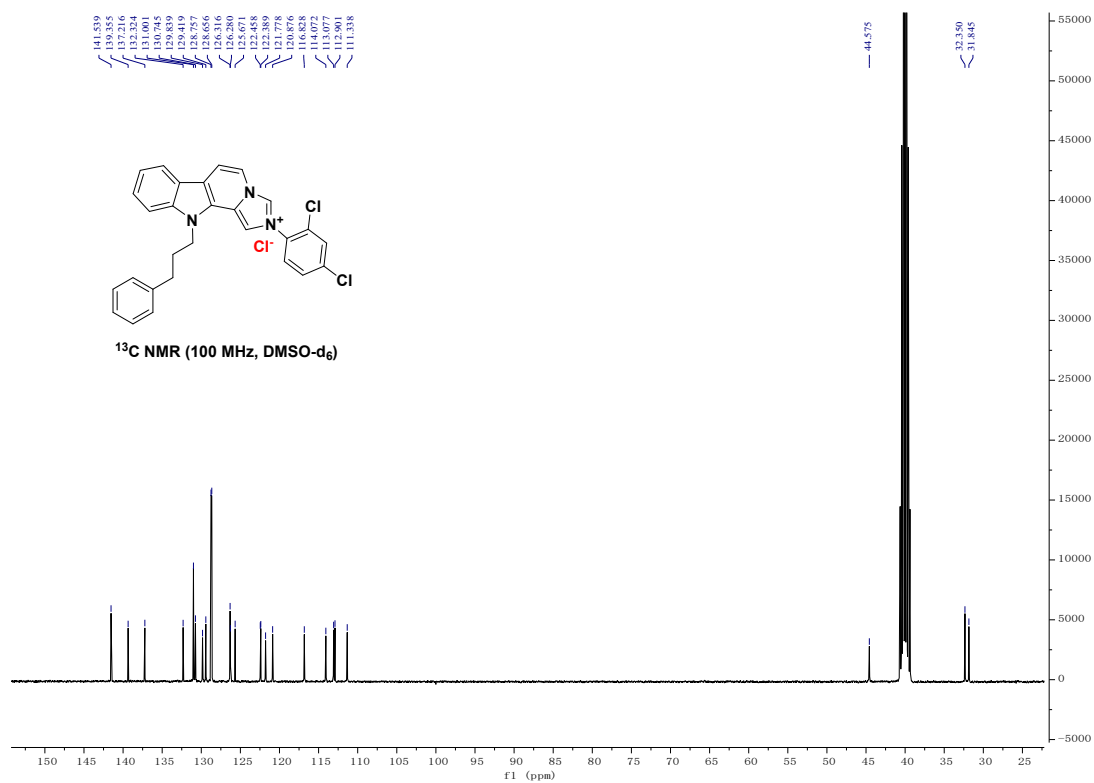

Figure S22-1 the <sup>1</sup>H NMR spectrum and <sup>13</sup>C NMR spectrum of compound **3v**

123 #11 RT: 0.14 AV: 1 NL: 6.60E8  
T: FTMS + p ESI Full ms [150.00-2000.00]

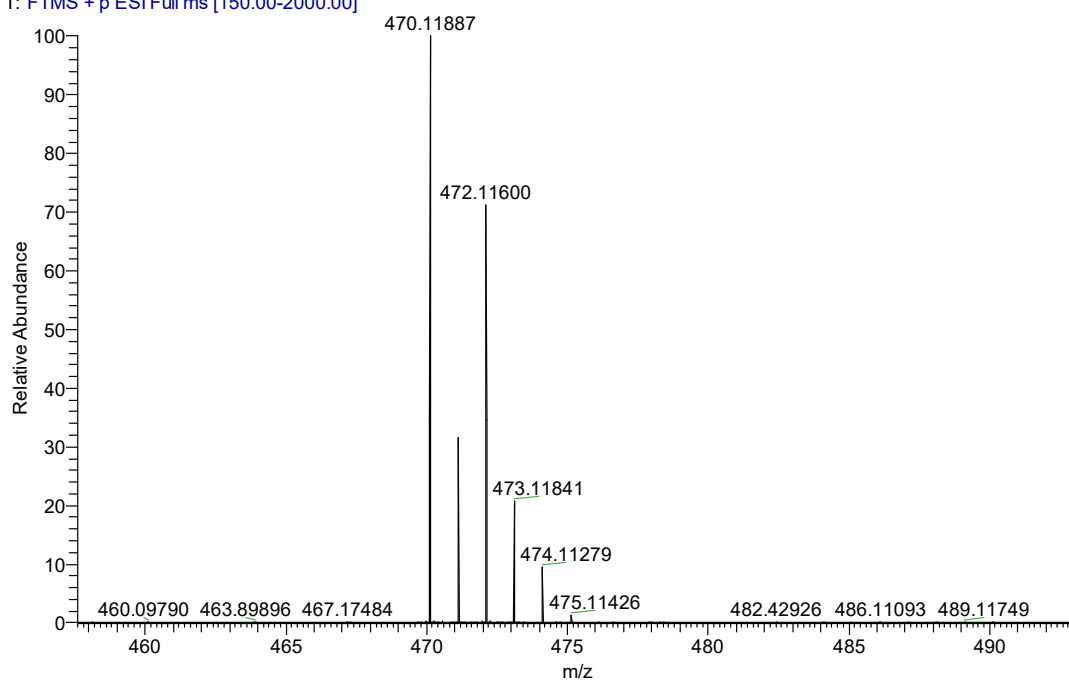

Figure S22-2 the HRMS data of compound **3v**

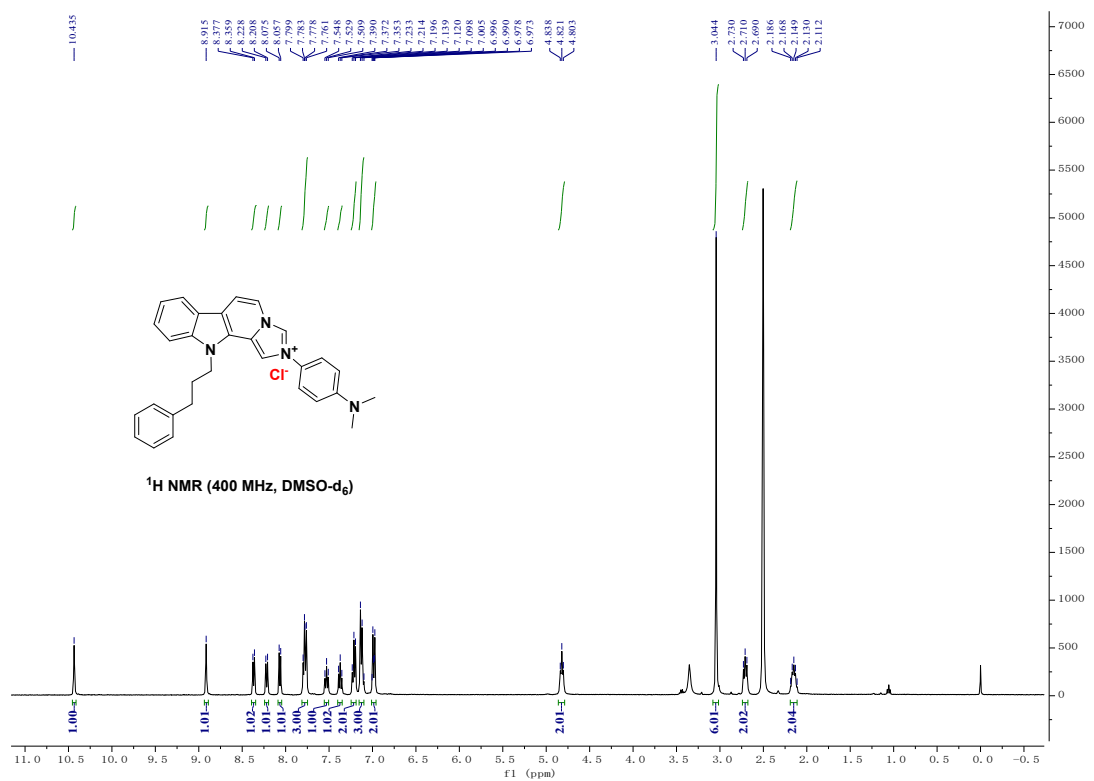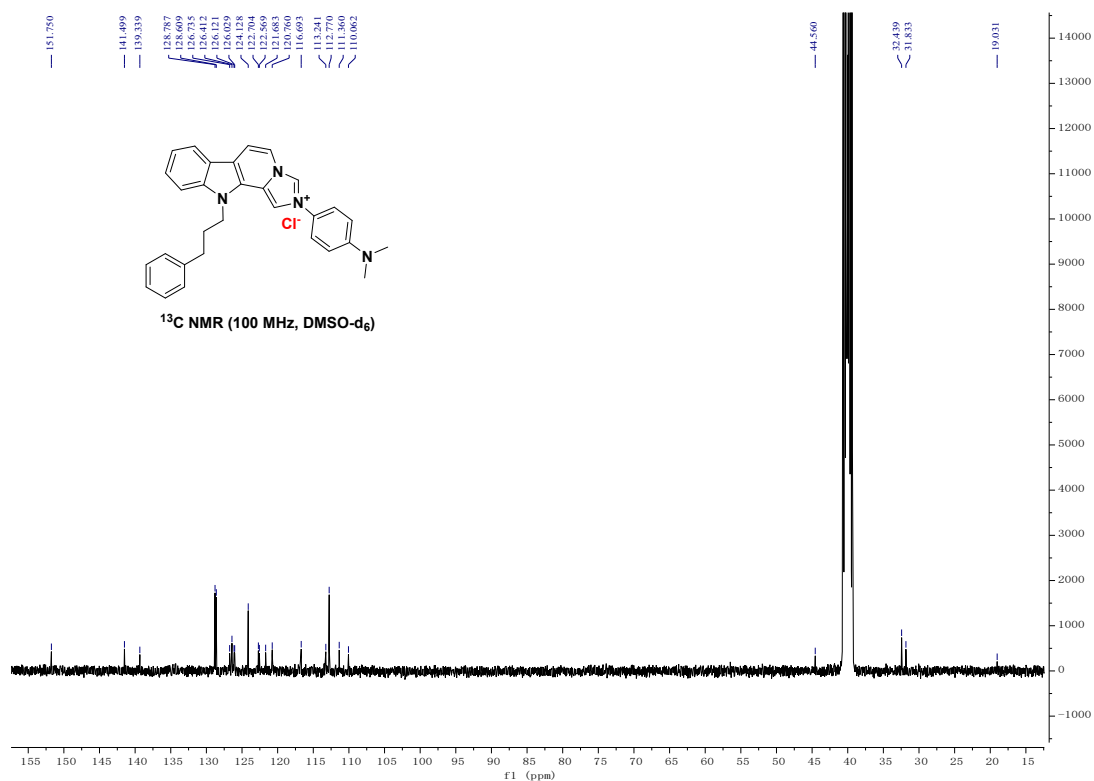

Figure S23-1 the <sup>1</sup>H NMR spectrum and <sup>13</sup>C NMR spectrum of compound 3w

130 #13 RT: 0.17 AV: 1 NL: 2.23E8  
T: FTMS + p ESI Full ms [150.00-2000.00]

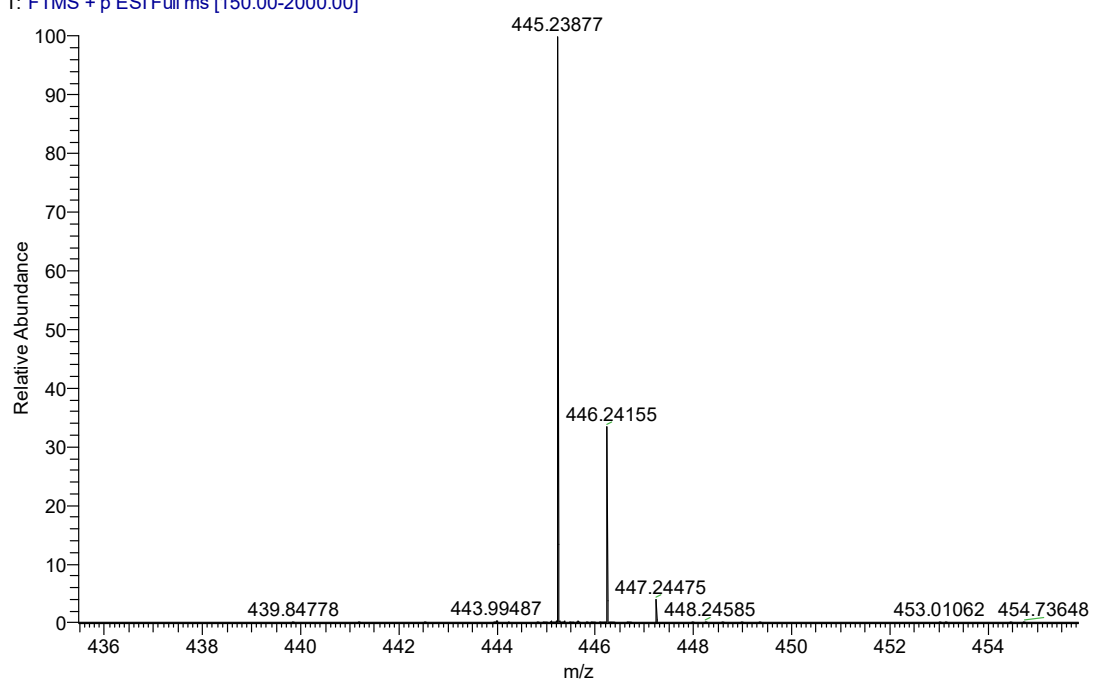

**Figure S23-2** the HRMS data of compound **3w**

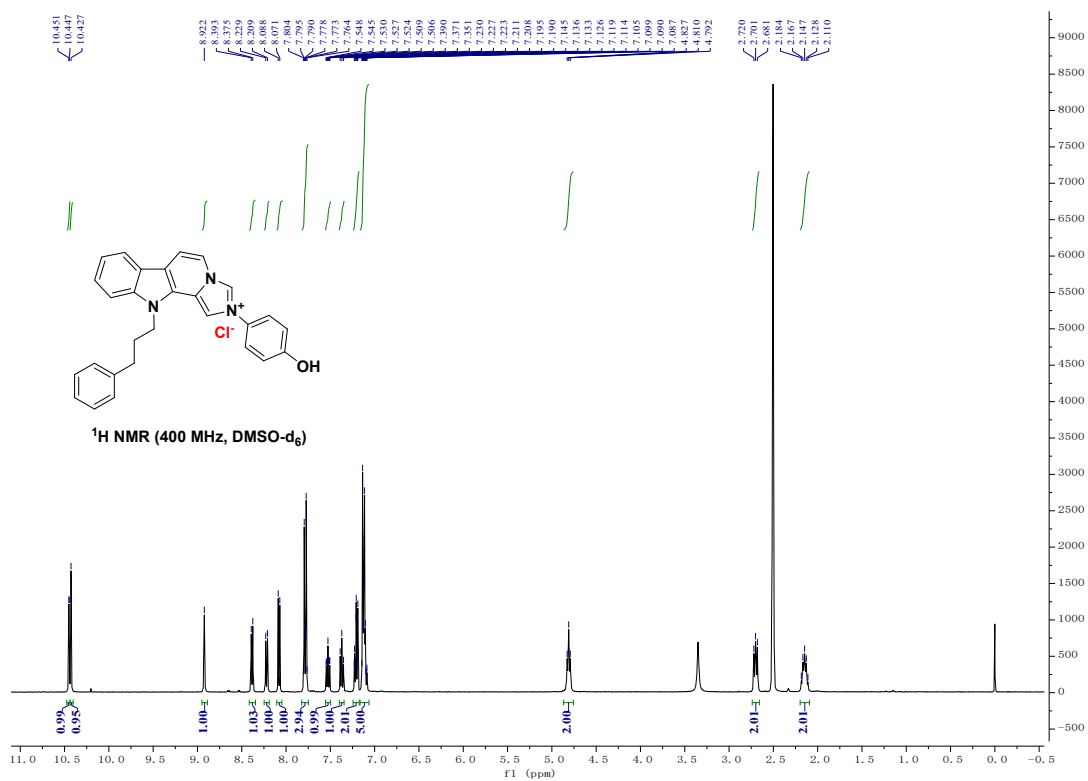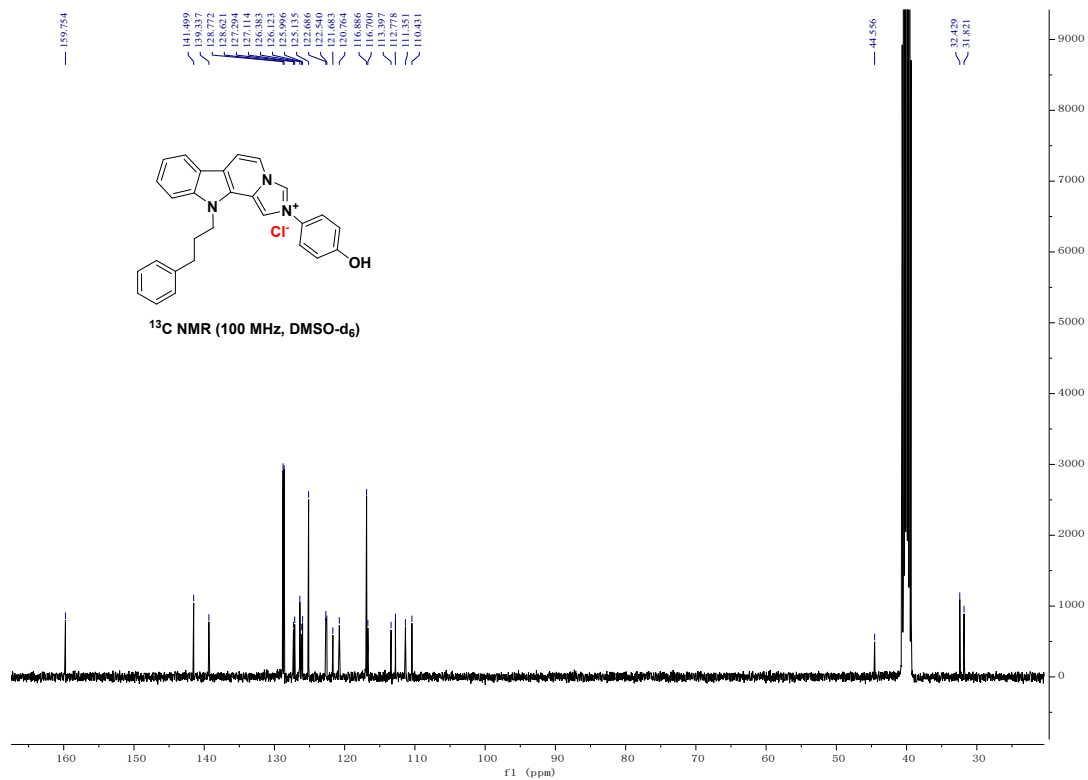

Figure S24-1 the <sup>1</sup>H NMR spectrum and <sup>13</sup>C NMR spectrum of compound 3x



131 #9 RT: 0.11 AV: 1 NL: 3.54E8  
T: FTMS + p ESI Full ms [150.00-2000.00]

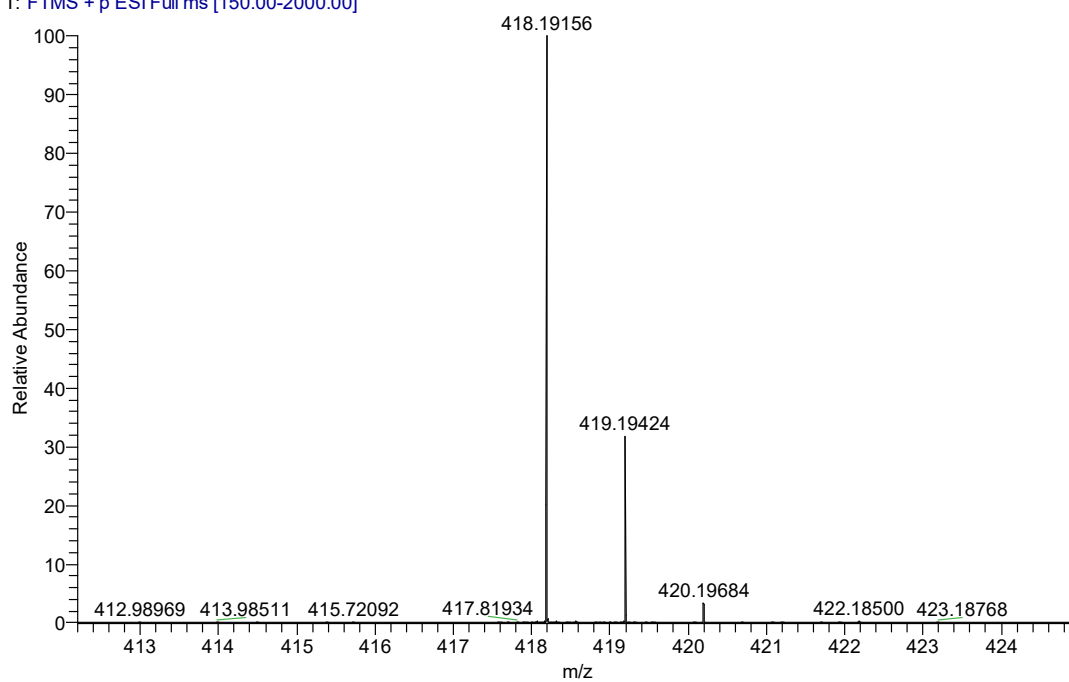

**Figure S24-2** the HRMS data of compound **3x**

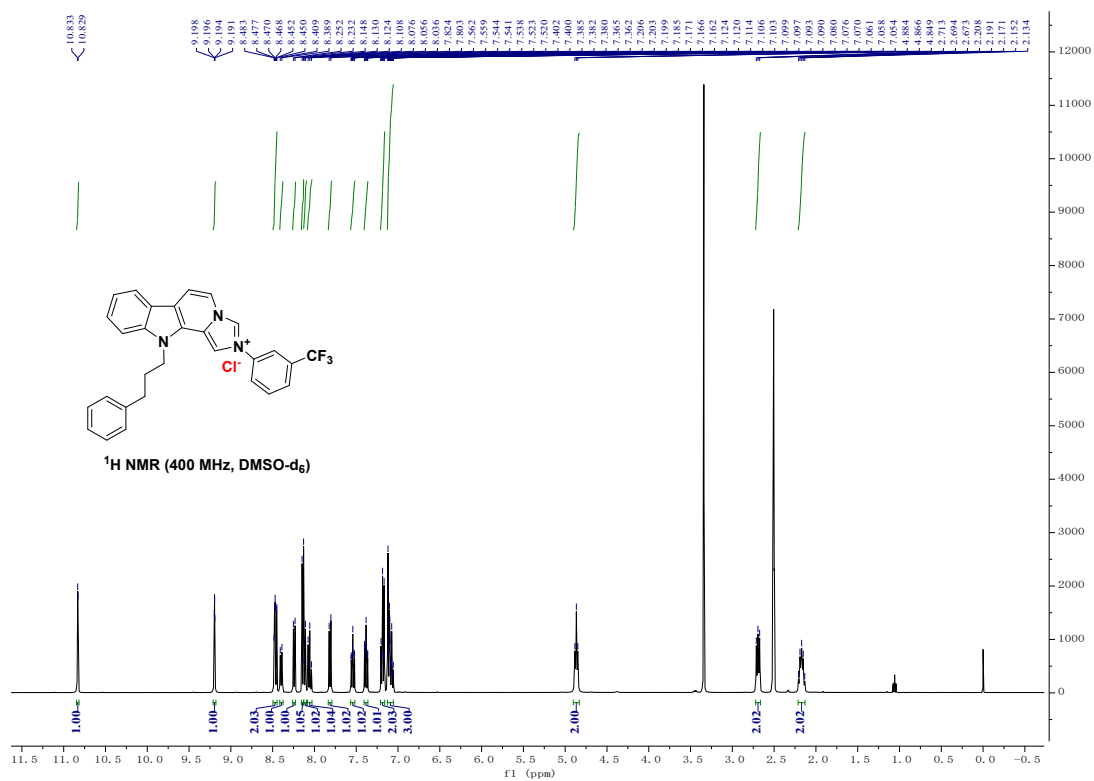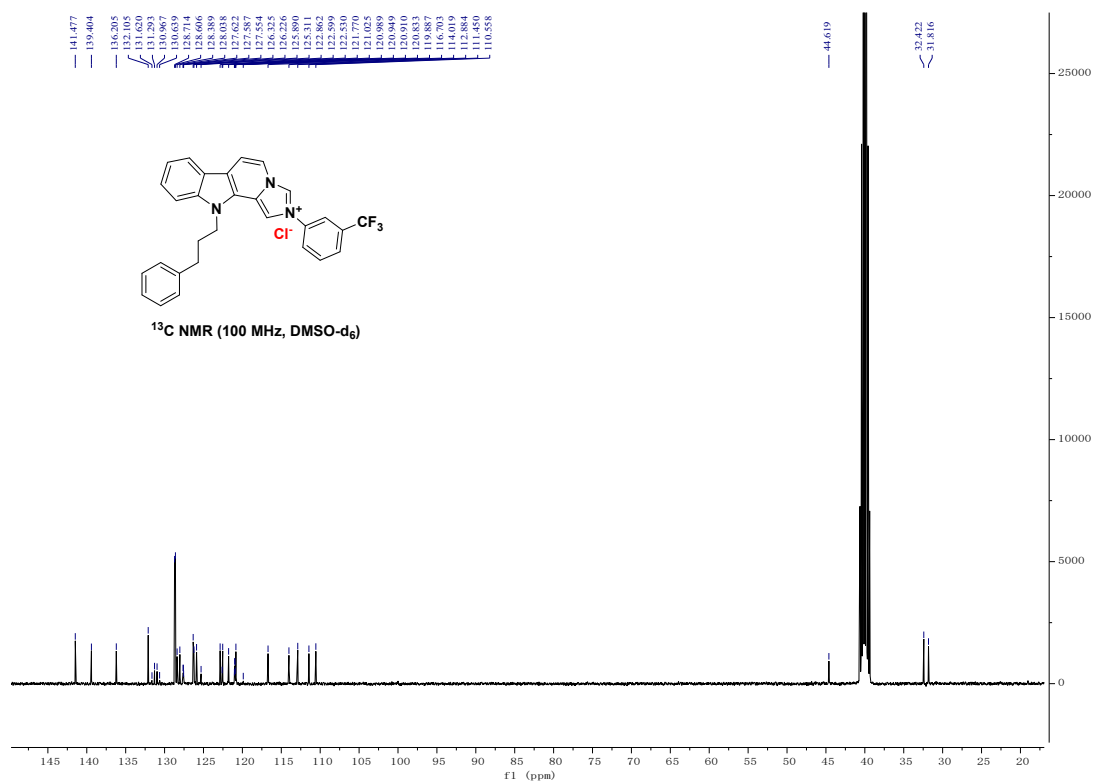

Figure S25-1 the <sup>1</sup>H NMR spectrum and <sup>13</sup>C NMR spectrum of compound **3y**

132 #10 RT: 0.13 AV: 1 NL: 1.01E9  
T: FTMS + p ESI Full ms [150.00-2000.00]

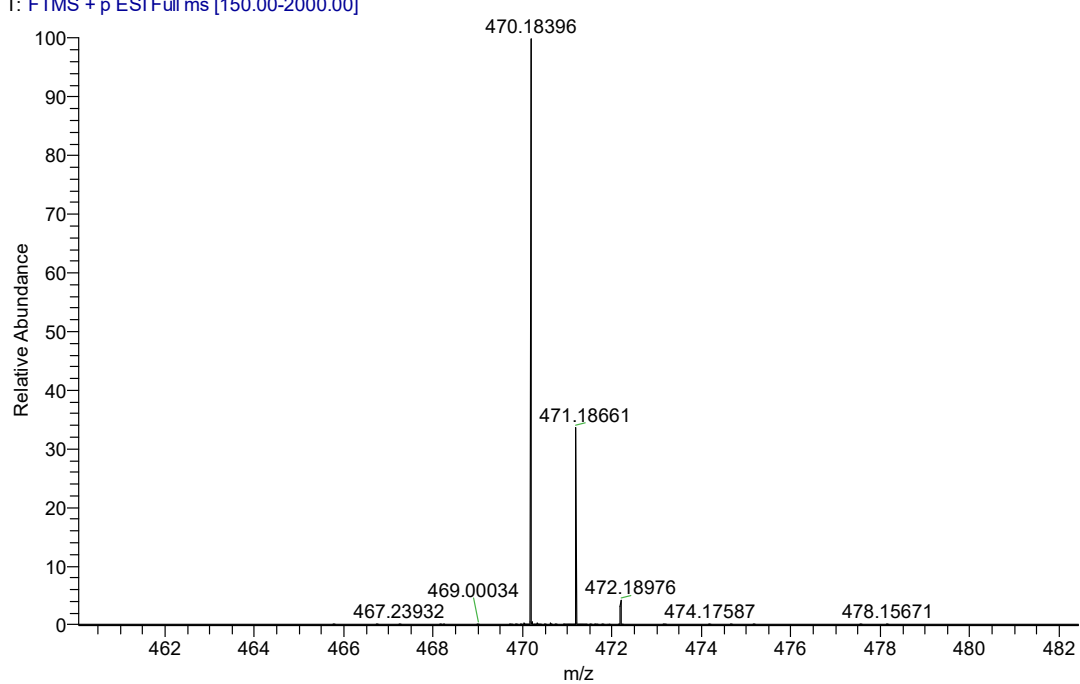

**Figure S25-2** the HRMS data of compound **3y**

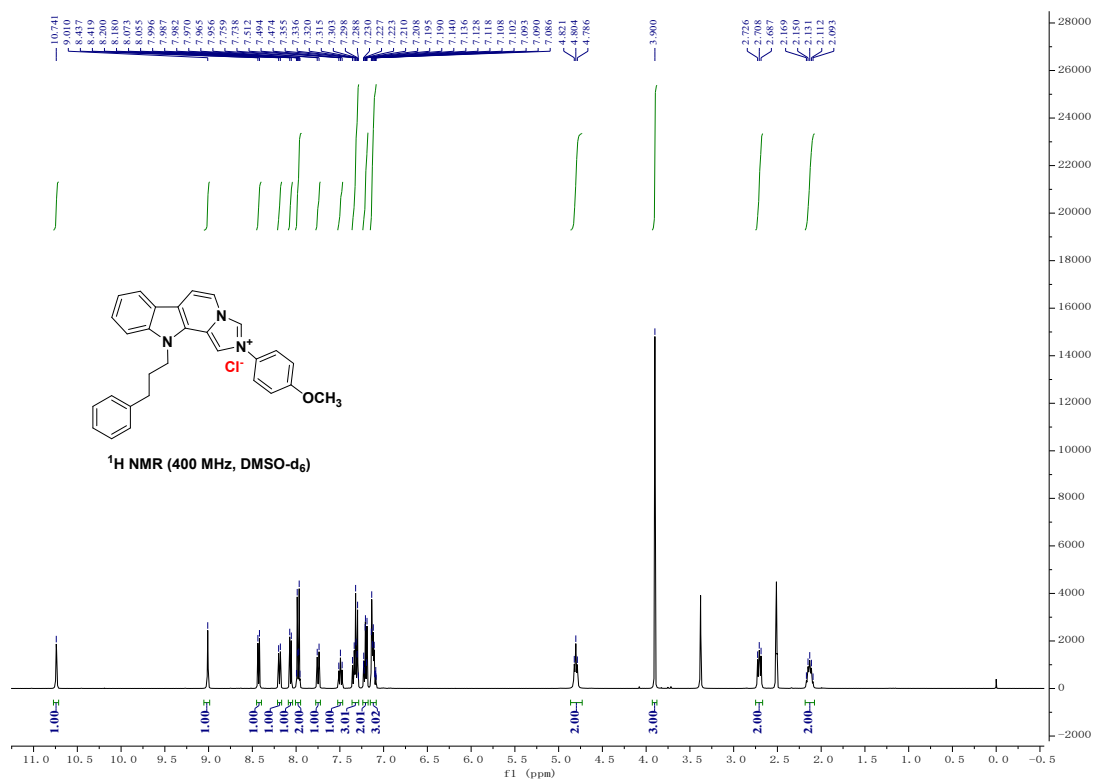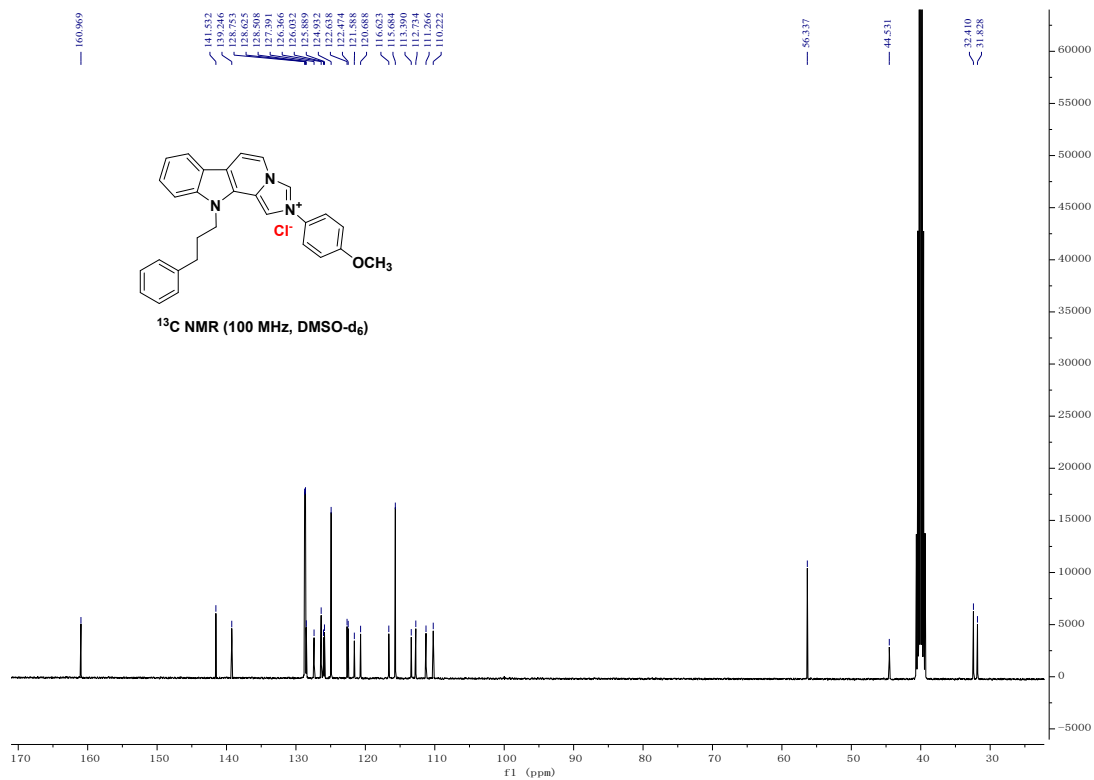

Figure S26-1 the <sup>1</sup>H NMR spectrum and <sup>13</sup>C NMR spectrum of compound 3z

122 #9 RT: 0.11 AV: 1 NL: 7.93E8  
T: FTMS + p ESI Full ms [150.00-2000.00]

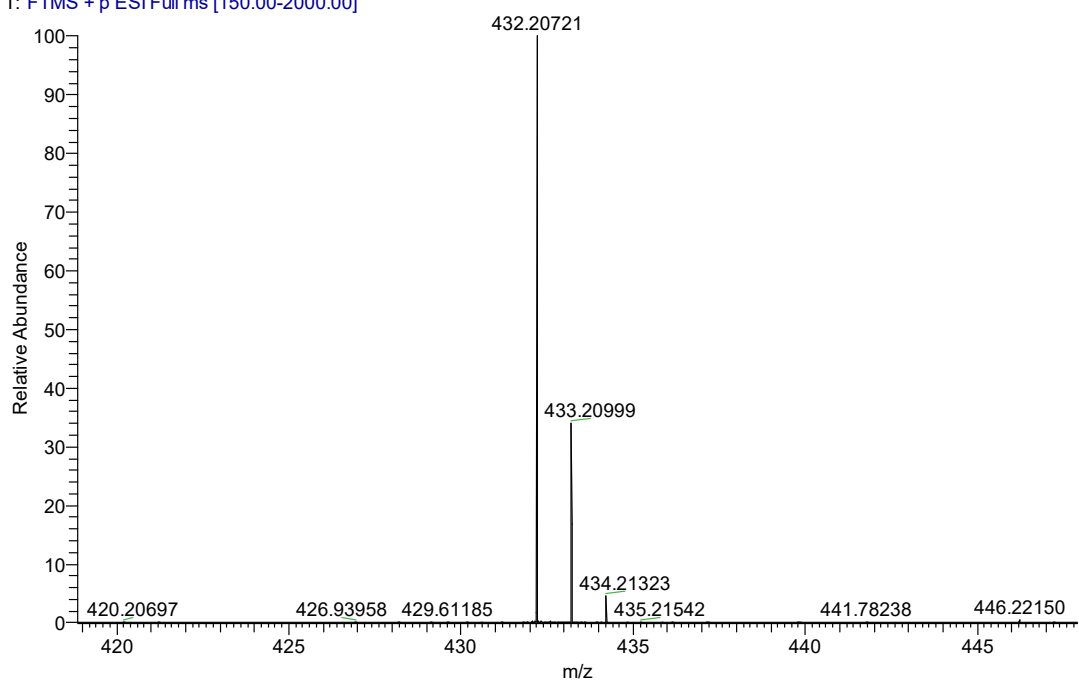

**Figure S26-2** the HRMS data of compound **3z**

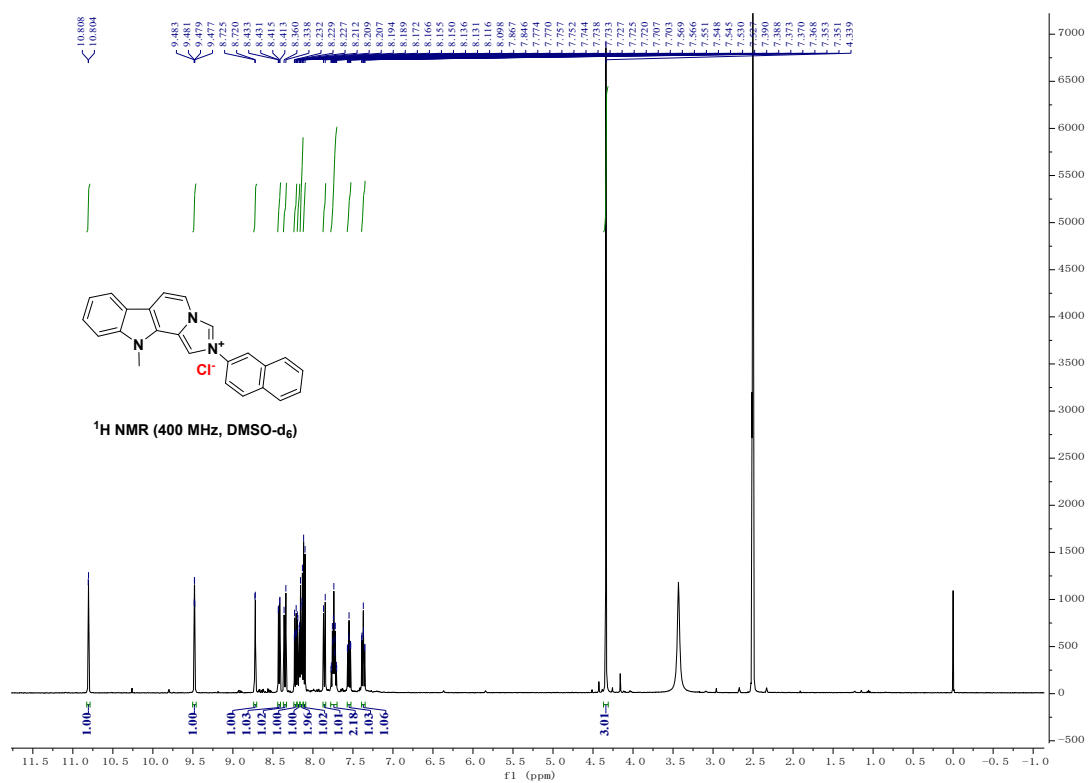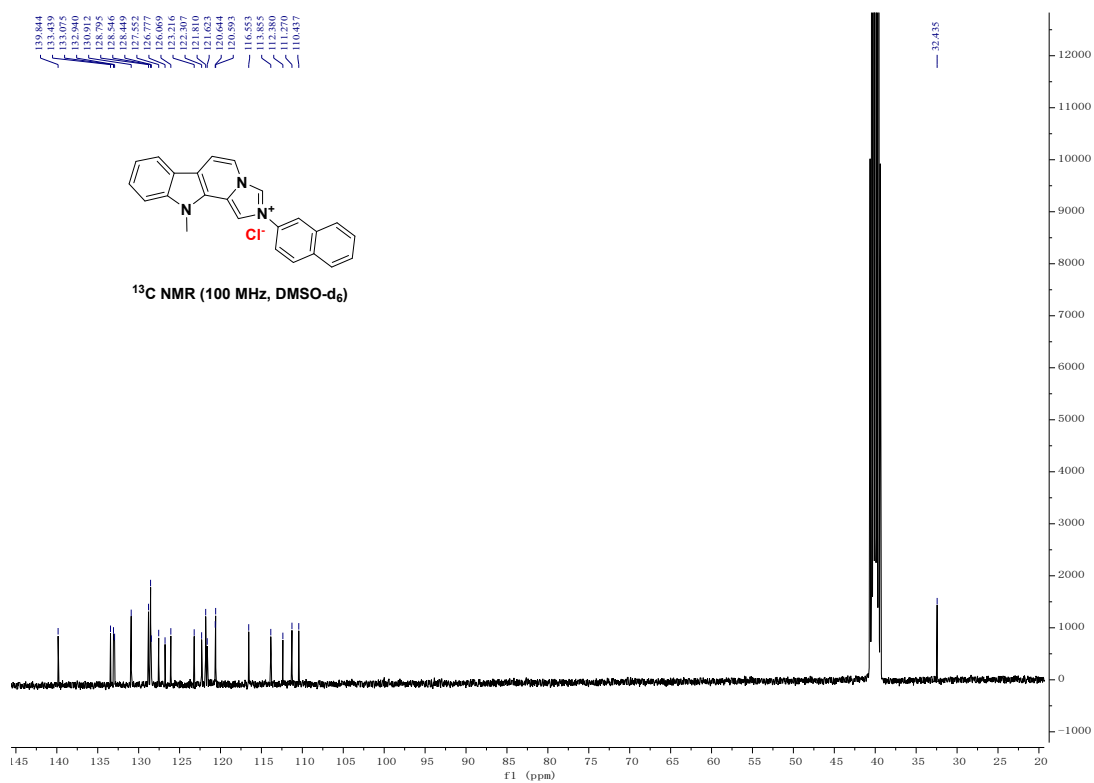

Figure S27-1 the <sup>1</sup>H NMR spectrum and <sup>13</sup>C NMR spectrum of compound 3aa

127 #14 RT: 0.19 AV: 1 NL: 1.41E8  
T: FTMS + p ESI Full ms [150.00-2000.00]

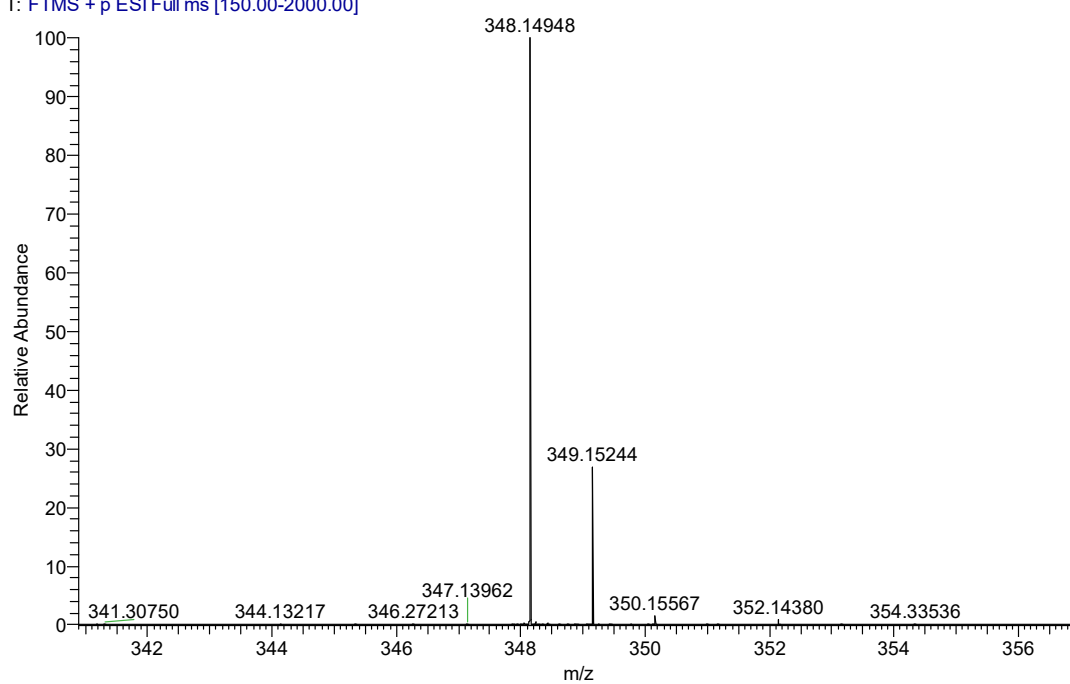

Figure S27-2 the HRMS data of compound **3aa**

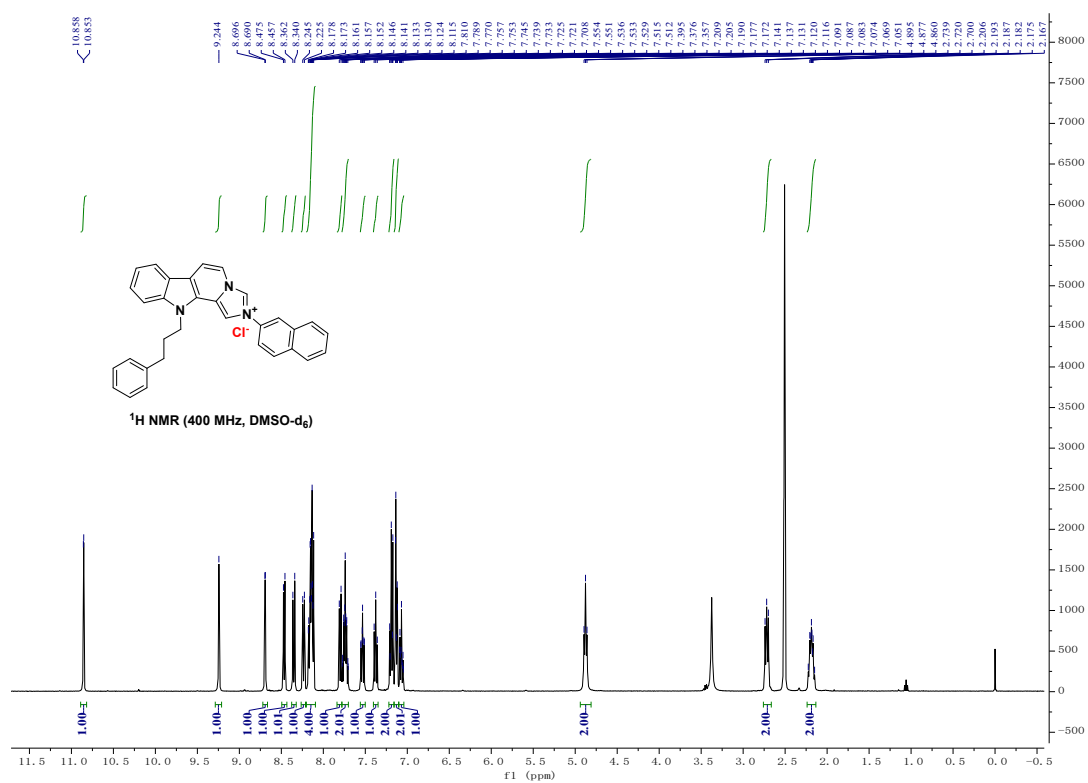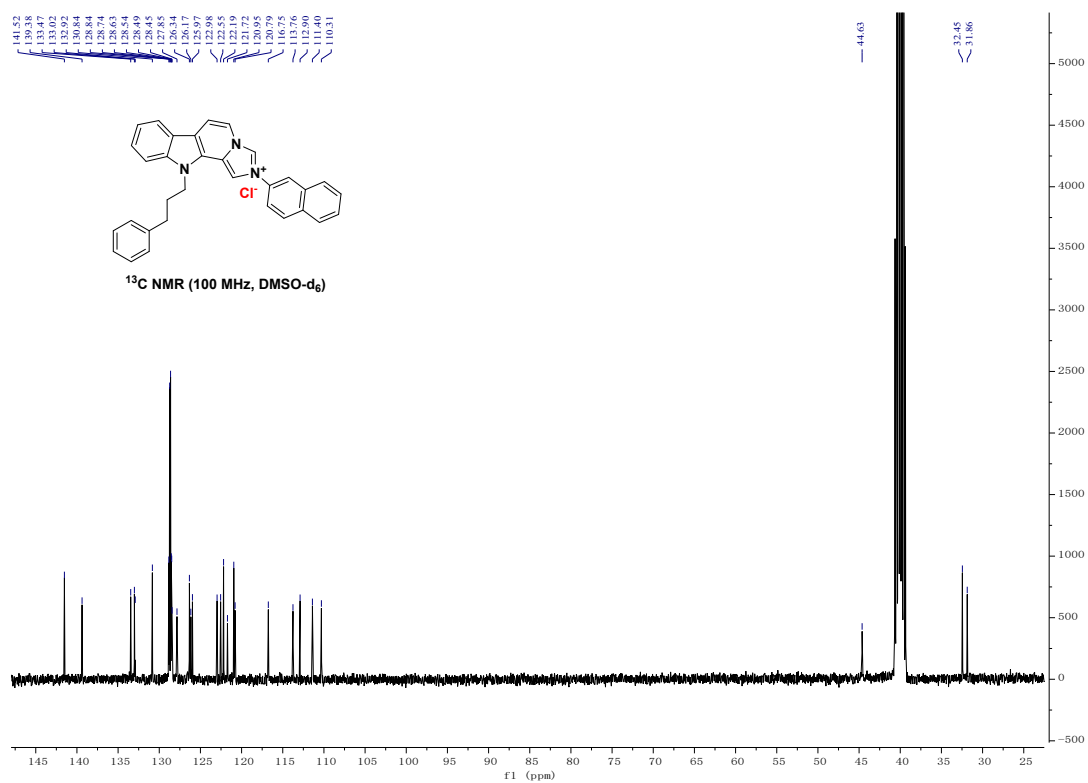

Figure S28-1 the <sup>1</sup>H NMR spectrum and <sup>13</sup>C NMR spectrum of compound **3ab**



133 #13 RT: 0.17 AV: 1 NL: 2.14E8  
T: FTMS + p ESI Full ms [150.00-2000.00]

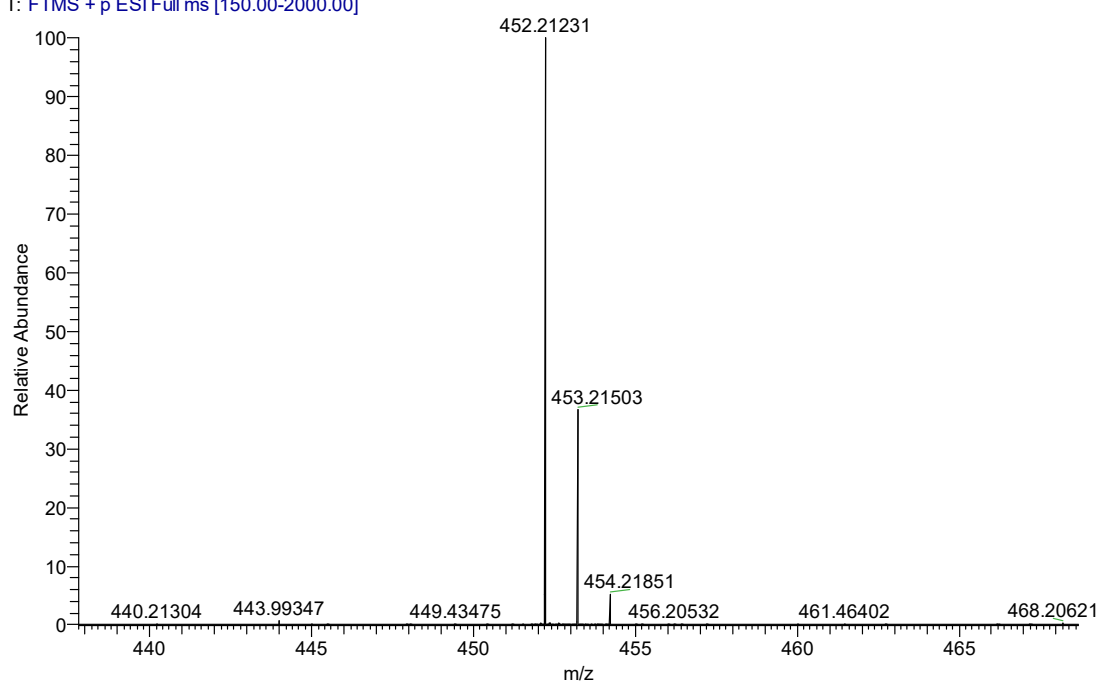

**Figure S28-2** the HRMS data of compound **3ab**
